1           Are dogs with congenital hearing and/or vision impairments so  
2                                   different from sensory normal dogs?

3           A survey of demographics, morphology, health, behaviour,  
4                                   communication, and activities.

5

6   Sophie Savel <sup>1\*</sup>, Patty Sombé <sup>2</sup>

7

8

9

10

11   <sup>1</sup> Aix Marseille University, CNRS, Centrale Marseille, LMA UMR 7031, Marseille, France

12

13   <sup>2</sup> Non-profit organisation “Blanc Comme Neige”, Saint-Denis-sur-Scie, France

14

15

16

17   \* Corresponding author

18   E-mail: [savel@lma.cnrs-mrs.fr](mailto:savel@lma.cnrs-mrs.fr) (SS)

20 **Abstract** [293 words]

21 The births of domestic dogs with pigment deletion and associated congenital hearing and/or  
22 vision impairments are increasing, as a result of mutations of certain genes expressing  
23 popular coat colour patterns (Merle, piebald, Irish spotting). The future of these dogs is often  
24 pessimistic (early euthanasia or placement in rescues/fosters, lack of interactions and  
25 activities for adults). These pessimistic scenarios result from popular assumptions predicting  
26 that dogs with congenital hearing/vision impairments exhibit severe Merle-related health  
27 troubles (cardiac, skeletal, neurological), impairment-related behavioural troubles  
28 (aggressiveness, anxiety), and poor capacities to communicate, to be trained, and to be  
29 engaged in leisure or work activities. However, there is no direct scientific testing, and hence  
30 no evidence or refutation, of these assumptions. We therefore addressed an online  
31 questionnaire to owners of 223 congenitally sensory impaired (23 vision impaired, 63 hearing  
32 impaired, 137 hearing and vision impaired) and 217 sensory normal dogs from various  
33 countries. The sensory normal cohort was matched in age, lifetime with owner, breed and sex  
34 with the sensory impaired cohort, and was used as a baseline. The questionnaire assessed  
35 demographics, morphology, sensory impairments, health and behavioural troubles, activities,  
36 and dog-owner communication. Most hearing and vision impaired dogs exhibited abnormal  
37 pigment deletion in their coat and irises. Vision impaired dogs additionally exhibited  
38 ophthalmic abnormalities related to Merle. The results refute all above-listed assumptions,  
39 except for neurological troubles. We however suggest that reports of neurological troubles  
40 could be partially accounted for by lacks of diagnosis of breed-related drug sensitivity and  
41 impairment-related compulsive behaviours. Results about communication and activities are  
42 particularly optimistic. The need for future studies of numerous dogs from various breeds  
43 tested for Merle, piebald and medical-drug-resistance genes, and the beneficial effects that  
44 present and future research may have on the future of sensory impaired dogs, are discussed.

## 45 **Introduction**

46 In order to meet an increasing demand for pet dogs, most countries report growing numbers  
47 of dog breeders, atypical phenotypes in either existing or novel dog breeds, and births of  
48 puppies with various genetic defects [1]. For example, the population of dogs with congenital  
49 hearing and/or vision impairments is increasing. This population, which is the focus of the  
50 present study, mostly results from mutations of the genes that express certain of the most  
51 popular coat colour patterns.

## 52 **Demographics and genetics of congenitally sensory impaired dogs**

53 One of the most popular coat patterns in dogs is Merle. The Merle coat can be described as a  
54 patchwork randomly composed of areas of full pigmentation combined with areas of lighter,  
55 diluted pigmentation. Originally, the Merle trait was essentially produced in certain breeds,  
56 mainly from the herding group. This trait has progressively been introduced in a growing  
57 number of, sometimes unexpected, breeds. To date, Merle can be found in the following  
58 breeds, listed in alphabetic order: Alapaha Blue Blood Bulldog, American Cocker Spaniel,  
59 American Pit Bull Terrier, American Staffordshire Terrier, Australian Koolie, Australian  
60 Shepherd, Border Collie, Boxer, Chihuahua, Collie, Dachshund, French Beauceron, French  
61 Bulldog, Great Dane, Hungarian Mudi, Labradoodle, Louisiana Catahoula, Lurcher,  
62 Miniature American Shepherd, Norwegian Dunkerhound, Schnauzer, Shetland Sheepdog,  
63 Pomeranian, Poodle, Pyrenean Shepherd, and Welsh Sheepdog [2-4]. The Merle coat is  
64 particularly frequent in Australian Shepherds, followed by Border Collies, Great Danes, and  
65 Shetland Sheepdogs. To note, Merle is not accepted for registration in kennel clubs for  
66 several of the breeds listed.

67 The Merle coat is expressed by the gene of same name located on the M locus, that is  
68 inherited in an autosomal, incomplete dominant manner [5]. Merle is, at the homozygous

69 “double Merle” state, one the four known pigment genes in dogs, along with piebald [2], Irish  
70 spotting [2] and KIT [6], whose mutation has the deleterious effect of deleting pigments in  
71 hairs, skin, nose and mucous, iris and tapetum lucidum, and stria vascularis of the inner ear.  
72 The lack of pigments in the stria vascularis causes early death of sensory hair cells in the  
73 scala media. As a result, dogs with mutated above-mentioned genes have excessive white  
74 coat, pink skin, nose and mucous, light blue irises, and congenital, sensorineural, irreversible  
75 hearing impairments.

76 As for Merle, piebald concerns various breeds, but this trait, located on the S locus, is  
77 recessive. Pigment deletion and hearing impairments mostly occur in homozygous piebalds.  
78 No genetic testing is yet available for Irish spotting, although this gene is assumed to be  
79 present in numerous breeds. The KIT mutation is less statistically problematic, because it  
80 exclusively concerns the German Shepherd breed and is early embryonic lethal at the  
81 homozygous state.

82 Contrary to piebald, Irish spotting and KIT, Merle is additionally associated with  
83 various congenital ophthalmic abnormalities, referred to as Merle Ocular Dysgenesis. The  
84 most severe ophthalmic abnormalities are observed in homozygous Merles [7-8]. Ophthalmic  
85 abnormalities in homozygous Merles can concern the eyeball (reduced size, called  
86 microphthalmia, or total absence), the cornea (microcornea), the iris (coloboma, hypoplasia),  
87 the size, shape, position or reaction of the pupil (starburst or misshapen pupil, dyscoria,  
88 corectopia), the pupillary membrane (persistence), the lens (cataract, microphakia, luxation),  
89 the sclera (coloboma, staphyloma), the retina (detachment, dysplasia), and the optic nerve.  
90 Depending on the severity of their ophthalmic abnormalities, homozygous Merles can exhibit  
91 moderate to severe vision impairments. These vision impairments related to Merle are  
92 susceptible to worsen, or even to appear, over the life course.

93           It has long been assumed that the M locus has two possible alleles, namely non-merle  
94 (m, expressing solid phenotype) and Merle (M, expressing Merle phenotype). Latest research  
95 has identified between four and six variations of the Merle allele, as a function of the length  
96 of the poly-A tail of its SINE insertion [9-10; 3]. The most detailed work is that conducted by  
97 Langevin and colleagues, who have tested hundreds of dogs from various breeds on the M  
98 locus and have determined six Merle allele variations [3-4]. Their goals were to accurately  
99 determine which SINE insertion lengths can express a Merle pattern, which phenotype is  
100 most typically associated with each possible genotype, which cases of mosaicism can occur,  
101 and which breeding between genotypes are susceptible to produce excess white, sensory  
102 impaired, double Merle puppies. However, these genetics studies of Merle are very recent.  
103 The state-of-the-art equipment needed for precise examination of SINE insertion length and  
104 mosaicism is recent and expensive. Therefore, only two of the 16 laboratories that propose  
105 Merle testing in dogs can currently provide this detailed information in their test results. Few  
106 of the remaining laboratories provide state-of-the-art information about Merle genetics on  
107 their public websites [11]. As a result, many dog breeders and owners are not fully aware of  
108 the complexity of Merle genetics and the conditions of at-risk breeding. Many countries have  
109 not yet strictly regulated Merle breeding. Comparable lacks of information and regulation are  
110 observed for different breeds with piebald trait.

111           For all the reasons mentioned above, births of excess white puppies with congenital,  
112 sensorineural, irreversible hearing and/or vision impairments are still frequently observed  
113 worldwide. There are different possible scenarios regarding the future of these puppies. Non-  
114 professional breeders and private individuals with little knowledge of the genetics of sensory  
115 impairments sell their puppies as exotic specimens without providing any adequate  
116 information to buyers. Numerous professional breeders with informed knowledge either have  
117 the puppies euthanized shortly after birth or entrust them after weaning to specialised rescue

118 centres or foster programs that have very restrictive adoption criteria for such dogs. Dogs that  
119 have been lucky enough to be adopted and to become adults often live in controlled –  
120 sometimes “overprotective” – environments, and do not often have access to canine activities.  
121 All these pessimistic scenario result from a series of popular assumptions about deaf and/or  
122 blind dogs, that are detailed below.

## 123 **Assumptions about sensory impaired dogs**

124 It is often assumed that excess white dogs, particularly double Merles, exhibit severe, or even  
125 lethal, health issues in their neurological, cardiac, skeletal and reproductive systems. We  
126 propose below three possible origins of these possibly false assumptions.

127         First, the assumption of lethality in excess white, double Merle dogs may originate  
128 from the fact that, in horses, the mutation of the Overo gene causes both abnormal white coat  
129 and early death of the foal [12]. A popular belief has incorrectly extended this relatively well-  
130 known fact to all mammalian animal species. Accordingly, many websites and social media  
131 relative to canine genetics refer to excess white dogs as “lethal white dogs”. In fact, there are  
132 only four canine genes that have proved to be – early embryonic – lethal at the homozygous  
133 state (KIT in German Shepherds, “Natural Bobtail” in various breeds, Harlequin in Great  
134 Danes, and “Hairless” in Chinese, Mexican and Peruvian hairless breeds) [4]. Merle is not  
135 one of them.

136         Second, the assumption of neurological issues in doubles Merles may originate in part  
137 from the fact that the most common neurological disorder in dogs, namely primary idiopathic  
138 epilepsy, is frequent in certain breeds from the herding group, such as Australian Shepherds  
139 and Border Collies [13]. As specified above, these two breeds are most frequently concerned  
140 by the homozygous Merle genotype. The assumption of neurological issues may additionally,  
141 or even above all, result from the fact that Australian Shepherds and Border Collies are also

142 frequently concerned by mutations of the medical drug resistance (MDR1) gene [14-15]. As  
143 detailed further below, mutated MDR1 gene elicits neurotoxic, sometimes epileptiform  
144 reactions to common chemical agents (*e.g.*, parasite control products) that are well tolerated  
145 by dogs with normal MDR1 gene. In other words, whether the neurological signs observed in  
146 double Merle Australian Shepherds and Border Collies are linked to Merle, as frequently  
147 assumed, or to breed-dependent disorders and MDR1 mutation, is undetermined.

148 Third, assumptions of cardiac, skeletal and reproductive issues in doubles Merles may  
149 essentially originate from multiple citations of a single study, that just contained the  
150 following short statement in the Introduction: “*In all breeds, the double merle genotype can*  
151 *be sublethal and is associated with multiple abnormalities of the skeletal, cardiac, and*  
152 *reproductive systems*” [5]. However, this study was on genetic testing of Merle, not on health,  
153 and cited three studies to support the statement [16-18]. These three studies were conducted  
154 long before genetic testing of Merle was available, examined either small or poorly  
155 genetically diversified dog cohorts (*i.e.*; total of 32 dogs or single genealogical branch), and  
156 never clearly referred to the types of health issues that are nonetheless listed in the statement  
157 quoted above.

158 Moreover, it is often assumed that congenitally deaf and/or blind dogs exhibit  
159 behavioural troubles (see foreword by Strain in [19]). Principally, their severe sensory  
160 impairment(s) are believed to increase frustration, and to elicit resultant aggressiveness and  
161 anxiety troubles. Also, it is assumed that deaf and/or blind dogs are particularly susceptible to  
162 bite because they are easily startled when they are approached. Abnormal brain structures,  
163 and concomitant abnormal mental capacities, have also been assumed in congenitally deaf  
164 dogs. However, this assumption is based on a single neuro-imagery study that just reported a  
165 reduction in size of the auditory cortex in congenitally deaf Dalmatians [20].

166 For dogs as for many social species, hearing and vision are two important sensory  
167 modalities for conspecific and interspecific communication [21]. Thus, deaf and/or blind dogs  
168 are believed to have poorer communication capacities, in particular with their human  
169 caregivers. As a result, it is often assumed that deaf and/or blind dogs cannot be trained, and  
170 cannot be safely and efficaciously engaged in any – individual or collective, conspecific or  
171 interspecific, leisure or work – activity.

## 172 **Aims and methodological choices of the study**

173 In summary, above-mentioned assumptions predict that congenitally hearing and/or vision  
174 impaired dogs frequently exhibit health and behavioural troubles, and are poorly capable of  
175 communicating and practicing activities. These assumptions are so popular that they have  
176 drastic consequences on the future of sensory impaired puppies. However, there is to date no  
177 scientific evidence or refutation of these assumptions. Precisely, there is no study that we are  
178 aware of that directly assessed either health, behaviour, communication or activities in  
179 congenitally sensory impaired dogs, or that compared sensory impaired and sensory normal  
180 dogs on these points. One exception is the study by Farmer-Dougan and colleagues, who  
181 addressed a survey of behavioural traits to owners of hearing/vision impaired and sensory  
182 normal dogs [22]. They found lower scores of aggressiveness and anxiety in the former  
183 cohort, which is opposite to the assumption.

184 The aims of the present study were therefore to examine health, behaviour,  
185 communication and activities for a cohort of congenitally hearing and/or vision impaired  
186 dogs, and to compare the results with those from a “baseline” cohort of sensory normal dogs  
187 that was matched in breed, age, sex and lifetime with owner with the sensory impaired cohort.  
188 Additionally, we aimed to gain insight concerning the diagnosis of sensory, particularly  
189 hearing, impairments. The sole way to assess unilateral hearing impairment in dogs is to



190 conduct objective measurements of brainstem auditory evoked responses (BAER). However,  
191 animal BAER testing sites are infrequent (*e.g.*, see list in [19]). Little is known about how  
192 exactly hearing is subjectively evaluated by veterinaries, breeders, owners, *etc.*, in the  
193 numerous dogs that have no access to BAER testing. Finally, we aimed to verify whether  
194 congenital sensory impairments were frequently associated with pigment deletion in the coat  
195 and irises and with ophthalmic abnormalities. As such, the genetic cause of the sensory  
196 impairments was indirectly explored.

197         To assess these different points, we chose to conduct an owner survey, a method that  
198 is frequently employed to assess, for example, health [23] and behaviour [22], in dogs.  
199 Surveys of dog owners have some disadvantages relative to the degrees of interest,  
200 understanding, recall and impartiality of the respondents, but have above all multiple  
201 advantages. They allow the inclusion of dogs with much wider characteristics compared to  
202 surveys of veterinaries or animal insurances for questions on health, dog behaviourists for  
203 questions on behaviour, or canine clubs for questions on activities. In other words, owner  
204 surveys are not restricted to dogs *with* health/behavioural issues and activities. We chose the  
205 online diffusion of the questionnaire in two languages, namely French and English, in order  
206 to expand its geographic distribution.

## 208 **Materials and methods**

### 209 **Questionnaire content**

210 The questionnaire contained 30 questions about dogs, divided into 7 sections:

211 • **Demographics:** country; date of birth; date of acquisition; site of acquisition; sex; breed;  
212 presence of other dog(s) at home.

213 • **Morphology:** surface of white coat on body and head; colour of irises; ophthalmic  
214 abnormalities; for sensory impaired dogs only: is there indication, from either genetic testing  
215 or parental phenotypes, that the dog is double Merle?

216 • **Determination of sensory impairments:** sensory status (*i.e.*, normal, partially impaired,  
217 totally impaired) at each ear and each eye; type of diagnosis test (*i.e.*, objective or subjective);  
218 operator of the subjective test; for hearing impairments only: stimuli and conditions of the  
219 subjective test.

220 • **Health:** has the dog ever suffered from neurological, heart, bones/joints, skin, digestive or  
221 other health troubles? has the dog been tested for the MDR1 gene? if so, did the test indicate  
222 MDR1 mutation, and hence abnormal drug sensitivity?

223 • **Behaviour:** has the dog ever suffered from aggressiveness, anxiety, attention  
224 deficit/hyperactivity disorder (ADHD), obsessive compulsive disorder (OCD), or other  
225 behavioural troubles? who diagnosed the behavioural trouble(s)? have drugs been prescribed  
226 for this/these trouble(s)?

227 • **Activities:** frequency of practice of a series of leisure/sport activities; level at which each  
228 reported activity is practiced; is the dog engaged in assistance/therapy activities with either  
229 elderly, blind, or diabetic/epileptic persons?

230 ● **Interspecific communication:** types of vocalisations produced by the dogs to  
231 communicate with their owners; types of signs used by the owners to communicate with, and  
232 train, their dogs.

233 All respondents gave their informed consent for the anonymous use and publication of  
234 their responses. They were proposed to send a picture of their dog to the first author by email.  
235 We received 88 pictures, that are presented in **S1 Fig** as illustrative examples of coat colour  
236 and ophthalmic abnormalities. The study was carried out in accordance with the ethical  
237 standards of the institutional review board at the Aix-Marseille University.

## 238 **Survey distribution**

239 The questionnaire was published online using Google forms in two languages: French and  
240 English (see screenshot of the English online questionnaire in **S2 Fig**). Both versions were  
241 operational online from 19<sup>th</sup> April 2019 until 30<sup>th</sup> September 2019. Calls for participation,  
242 that included a short description of the survey and a direct link to the google form, were  
243 published on a variety of social media. The social media dealt with various canine themes,  
244 such as breeding, genetics, sensory impairments, training methods, activities, veterinary  
245 medicine, and behaviour. Calls for participation specified that the questionnaire was  
246 addressed to owners of dogs:

- 247 ● aged between 9 months and 12 years
  - 248 ● with either no or congenital hearing and/or vision impairments
  - 249 ● that belonged to breeds for which the Merle coat is – frequently or occasionally – observed.
- 250 Dogs with acquired, late onset sensory impairments resulting from trauma, age, medication,  
251 surgery, *etc*, were explicitly excluded. Owners had the possibility to fill the questionnaire  
252 several consecutive times for different individual dogs.

## 254 **Size and geographic dispersion of the sample**

255 Following data collection, responses to the French version of the questionnaire were  
256 translated in their English equivalent. Responses to French and English versions were then  
257 gathered. Overall, owners of 510 individual dogs completed the survey. The responses  
258 relative to 75 dogs were excluded from data analysis because mandatory questions were  
259 inadequately responded and/or one above-mentioned criterion was not fulfilled. For example,  
260 33 dogs were aged less than 9 months, 24 were aged more than 12 years, and 20 were from  
261 “out-of-subject” breeds (*e.g.*, Beagle, Dalmatian, Yorkshire, Golden Retriever, unidentified  
262 mix of breeds, *etc.*). The final sample therefore included 440 individual dogs, whose  
263 geographic dispersion between continent and countries is presented in **Table 1**. About 85% of  
264 the dogs were from either France or United States of America. The remaining dogs were  
265 spread between 15 countries.

266 **Table 1. List of countries and corresponding number of dogs.**

| <b>Continent</b> | <b>Country</b> | <b>Number of dogs</b>    |
|------------------|----------------|--------------------------|
| <b>Europe</b>    | France         | 240                      |
|                  | Belgium        | 16                       |
|                  | Switzerland    | 7                        |
|                  | Netherlands    | 4                        |
|                  | United Kingdom | 4                        |
|                  | Germany        | 3                        |
|                  | Finland        | 2                        |
|                  | Italy          | 2                        |
|                  | Spain          | 1                        |
|                  | Slovakia       | 1                        |
|                  | <b>America</b> | United States of America |
| Canada           |                | 9                        |
| Mexico           |                | 2                        |
| Brazil           |                | 1                        |
| <b>Oceania</b>   | Australia      | 5                        |
|                  | New Zealand    | 3                        |
| <b>Africa</b>    | South Africa   | 4                        |

267 Continent and countries are sorted by descending number of dogs.

## 268 **Constitution of groups based on sensory status**

269 Responses about the hearing and vision sensory status of the dog (*i.e.*, normal, partially  
270 impaired, or totally impaired) were used to classify the 440 dogs in four groups:

271 • **HNVI (Hearing Normal Vision Impaired) = 23 dogs:** response “normal” for hearing at  
272 both ears, and response “partially/totally impaired” for vision at either one or both eyes

273 • **HIVN (Hearing Impaired Vision Normal) = 63 dogs:** response “partially/totally  
274 impaired” for hearing at either one or both ears, and response “normal” for vision at both eyes

275 • **HIVI (Hearing Impaired Vision Impaired) = 137 dogs:** response “partially/totally  
276 impaired” for hearing at either one or both ears and for vision at either one or both eyes

277 • **HNVN (Hearing Normal Vision Normal) = 217 dogs:** response “normal” for hearing at  
278 both ears and for vision at both eyes.

279 In summary, the study included 223 sensory impaired dogs, classified in three groups,  
280 and 217 sensory normal dogs. The first two sensory impaired groups had one – either hearing  
281 or vision – impairment, while the third sensory impaired group had both hearing and vision  
282 impairments. In the Figures and Tables below, the three sensory impaired groups were  
283 frequently gathered in a single “IMP” (impaired) cohort. The HNVN, sensory normal group  
284 was used as a baseline for comparison with the sensory impaired groups/cohort.

## 285 **Statistical analysis**

286 Owners were asked to report the exact dates of birth and acquisition of their dog. These two  
287 dates were used to determine the dog’s age and lifetime with owner, respectively, in years, at  
288 the day of participation in the survey. The normal distributions of individual age and lifetime  
289 values for each group and for the IMP cohort were assessed using Shapiro-Wilk tests. All  
290 distributions differed significantly from normal ( $p < 0.05$ ). Between-group comparisons in

291 both age and lifetime with owner were therefore assessed using non-parametric, Kruskal-  
292 Wallis tests.

293 The frequency of each categorical response under study was obtained for each group  
294 by dividing the number of times the response was reported in the group by the total number of  
295 dogs in that group and then multiplying by 100. The response frequencies obtained are  
296 presented below either in Figures (ordinate) or in Tables. Chi<sup>2</sup> tests for unpaired data were  
297 used to statistically assess two-by-two differences between groups in categorical responses.  
298 Each Chi<sup>2</sup> test compared the raw numbers of reported/A and non-reported/B responses  
299 obtained in one group (*e.g.*, numbers of “yes” and “no” responses, numbers of “male” and  
300 “female” responses, *etc.*) with those obtained in the other group. The list of comparisons  
301 assessed using Chi<sup>2</sup> tests is provided in **Table 2**.

302 Two-tailed *p* values reported in text and Figures were adjusted using the Holm’s  
303 correction for multiple comparisons. In Figures, *p* values for significant tests are emboldened  
304 and are followed by either four ( $p < 0.0001$ ), three ( $p \geq 0.0001$  and  $< 0.001$ ), two ( $p \geq 0.001$   
305 and  $< 0.01$ ) or one ( $p \geq 0.01$  and  $< 0.05$ ) asterisk(s). *p* values for non-significant tests are  
306 reported in plain and are followed by “(ns)”.

307 *[TABLE 2 IS ON NEXT PAGE]*

309 **Table 2. List of two-by-two comparisons between groups assessed using Chi<sup>2</sup> tests.**

| Response category                                           | Groups compared |              |              |              |              |             |
|-------------------------------------------------------------|-----------------|--------------|--------------|--------------|--------------|-------------|
|                                                             | HNVI<br>HIVN    | HNVI<br>HIVI | HIVN<br>HIVI | HNVN<br>HIVN | HNVN<br>HIVI | HNVN<br>IMP |
| <b>Demographics</b>                                         |                 |              |              |              |              |             |
| Breed ( <i>Australian Shepherd or Border Collie/other</i> ) |                 |              |              |              |              | X           |
| Sex ( <i>male/female</i> )                                  | X               |              |              |              |              |             |
| Other dog(s) at home ( <i>yes/no</i> )                      |                 |              |              |              |              | X           |
| <b>Morphology</b>                                           |                 |              |              |              |              |             |
| White on body (< 50%/≥ 50%)                                 | X               | X            | X            |              |              |             |
| White on head (< 50%/≥ 50%)                                 | X               | X            | X            |              |              |             |
| Iris colour ( <i>normal/abnormal</i> )                      | X               | X            | X            |              |              |             |
| Ophthalmic abnormalities ( <i>yes/no</i> )                  |                 |              |              |              |              |             |
| <i>Microphthalmia</i>                                       | X               | X            | X            |              |              |             |
| <i>Misshapen pupil</i>                                      | X               | X            | X            |              |              |             |
| <i>Cataract</i>                                             | X               | X            | X            |              |              |             |
| <i>Absence of eyeball</i>                                   | X               | X            | X            |              |              |             |
| <i>Other than listed</i>                                    | X               | X            | X            |              |              |             |
| <i>None</i>                                                 | X               | X            | X            |              |              |             |
| <b>Health troubles (<i>yes/no</i>)</b>                      |                 |              |              |              |              |             |
| Neurological                                                |                 |              |              |              |              | X           |
| Heart                                                       |                 |              |              |              |              | X           |
| Bones and joints                                            |                 |              |              |              |              | X           |
| Skin                                                        |                 |              |              |              |              | X           |
| Digestive                                                   |                 |              |              |              |              | X           |
| Other than listed                                           |                 |              |              |              |              | X           |
| None                                                        |                 |              |              |              |              | X           |
| Tested for MDR1 gene                                        |                 |              |              |              |              | X           |
| MDR1 test showed drug sensitivity                           |                 |              |              |              |              | X           |
| <b>Behavioural troubles (<i>yes/no</i>)</b>                 |                 |              |              |              |              |             |
| Aggressiveness                                              |                 |              |              |              |              | X           |
| Anxiety                                                     |                 |              |              |              |              | X           |
| ADHD                                                        |                 |              |              |              |              | X           |
| OCD                                                         |                 |              |              |              |              | X           |
| Other than listed                                           |                 |              |              |              |              | X           |
| None                                                        |                 |              |              |              |              | X           |
| <b>Activities (<i>yes/no</i>)</b>                           |                 |              |              |              |              |             |
| Canicross/bike/scootering                                   |                 |              |              |              |              | X           |
| Agility                                                     |                 |              |              |              |              | X           |
| Dog Dancing                                                 |                 |              |              |              |              | X           |
| Sheep Herding                                               |                 |              |              |              |              | X           |
| Tracking of objects or persons                              |                 |              |              |              |              | X           |
| Frisbee/flyball/treiball                                    |                 |              |              |              |              | X           |
| Other than listed                                           |                 |              |              |              |              | X           |
| None                                                        |                 |              |              |              |              | X           |

| <b>Dog vocalisations (yes/no)</b> |   |   |   |   |
|-----------------------------------|---|---|---|---|
| Barks                             | x | x | x | x |
| Growls/Grunts                     | x | x | x | x |

310 The categorical responses under comparison are given between brackets in italics, separately  
 311 by a slash, in the left column. For data on morphology, comparisons between groups focused  
 312 on sensory impaired groups (HNVI, HIVN and HIVI). For data on health, behaviour and  
 313 activities, the three sensory impaired groups were gathered in a single IMP cohort and then  
 314 compared with the HNVN group. For data on sex and dog vocalisations, comparisons were  
 315 selected from the results.

## 316 **Results and discussion**

### 317 **Demographics**

#### 318 **Age**

319 Box-plots of age values for each group and for the IMP cohort are presented in **Fig 1a**. There  
 320 was no significant two-by-two difference in age between sensory impaired groups (median  
 321 ages for HNVI, HIVN and HIVI groups = 2.6, 3.0 and 3.3 years, respectively;  $H < 0.25$ ,  $p =$   
 322 1.0) or between IMP and HNVN (median ages = 3.1 and 3.5 years, respectively;  $H = 3.87$ ,  $p$   
 323 = 0.34). The five distributions had comparable lower quartiles (between 1.4 and 2.1 years),  
 324 upper quartiles (between 5.0 and 5.8 years) and inter-quartile distances (between 3.1 and 3.8  
 325 years), and had few outlier values (frequencies  $\leq 5\%$ ). Age has therefore unlikely contributed  
 326 to between-group differences in the data examined in the different sections of the survey.

327 **Fig 1. Box-plots of individual values of (a) age and (b) lifetime with owner for each**  
 328 **group, and for the three sensory impaired groups gathered (IMP).** HNVI = hearing  
 329 normal vision impaired (grey), HIVN = hearing impaired vision normal (orange), HIVI =  
 330 hearing impaired vision impaired (red), HNVN = hearing normal vision normal (green), IMP  
 331 = impaired (purple), ns = not significant. The bold bar within the boxplot is the median, the  
 332 cross is the mean, the bottom and top of the box are the lower and upper quartiles,  
 333 respectively, and the dots are outlier values above the [upper quartile + 1.5 \* inter-quartile  
 334 distance] limit (top of upper vertical bars). Horizontal brackets indicate the two-by-two  
 335 comparisons between groups that were statistically assessed using Shapiro-Wilk tests.



## 336 **Lifetime with owner**

337 Box-plots of lifetime values for each group and for the IMP cohort are presented in **Fig 1b**.  
338 There was no significant two-by-two difference between sensory impaired groups (median  
339 lifetimes with owner for HNVI, HIVN and HIVI groups = 2.2, 2.4 and 2.3 years, respectively;  
340  $H < 0.24$ ,  $p = 1.0$ ), but the difference between IMP and HNVN cohorts was significant  
341 (median lifetimes with owner = 2.3 and 3.1 years, respectively;  $H = 13.50$ ,  $p = 0.002$ ). Both  
342 cohorts however had lower quartiles above one year. In behavioural studies of dog-owner  
343 communication that report the lifetime of the dyad, the smallest lifetime is one year [e.g., [24](#)].  
344 The difference in lifetime with owner between sensory impaired and sensory normal dogs in  
345 the present study have therefore unlikely contributed to differences between groups in the  
346 responses relative to interspecific activities and communication.

## 347 **Breed**

348 Owners were asked to report the breed of their dog using a list of purebred and mixed breeds  
349 followed by a field for manual report of non-listed breeds (see **S2 Fig**). The frequencies of the  
350 different responses obtained for each group are provided in **Table 3a**. The four groups were  
351 essentially composed of breeds from the herding group. Australian Shepherds and Border  
352 Collies, either purebred or mixed, represented 79% and 84%, respectively, of sensory  
353 impaired and sensory normal cohorts ( $X^2 = 0.22$ ,  $p = 1.0$ , ns). Potential effects of breed on the  
354 data examined below may have therefore been equally elicited in all groups.

355 All the breeds listed have standard coat colour patterns with only minor areas of white  
356 according to kennel clubs. Also, all breeds possibly carry three of the genes (Merle, piebald,  
357 Irish spotting) whose mutations are known to cause both pigment deletion in hairs and eyes  
358 and congenital hearing impairments (plus vision impairments for Merle) [[25](#); [3-4](#)].

359 **Table 3. Frequencies of responses, in percentages, obtained for each group and for the**  
 360 **IMP cohort for the following demographic data: (a) breed, (b) sex, (c) site of acquisition,**  
 361 **and (d) presence of other dog(s) at home.**

| <b>Demographic data</b>             | <b>HNVI</b> | <b>HIVN</b> | <b>HIVI</b> | <b>HNVN</b>   | <b>IMP</b>    |
|-------------------------------------|-------------|-------------|-------------|---------------|---------------|
| <b>(a) Breed</b>                    |             |             |             |               |               |
| <b>Herding group</b>                |             |             |             |               |               |
| Australian Shepherd                 | 39          | 49          | 41          | <b>51</b>     | <b>43</b>     |
| Australian Shepherd x Border Collie | 4           | 8           | 9           | <b>3</b>      | <b>8</b>      |
| Australian Shepherd x unknown       | 4           | 5           | 11          | <b>2</b>      | <b>9</b>      |
| Border Collie                       | 26          | 19          | 12          | <b>25</b>     | <b>15</b>     |
| Border Collie x unknown             | 9           | 3           | 4           | <b>3</b>      | <b>4</b>      |
| Shetland Sheepdog                   | --          | --          | 4           | <b>3</b>      | <b>2</b>      |
| Koolie                              | --          | --          | 1           | <b>2</b>      | <b>&lt; 1</b> |
| Miniature American Shepherd         | --          | 2           | --          | <b>2</b>      | <b>&lt; 1</b> |
| Beauceron                           | 4           | --          | --          | <b>3</b>      | <b>&lt; 1</b> |
| Beauceron x unknown                 | 4           | --          | --          | <b>2</b>      | <b>&lt; 1</b> |
| Rough Collie                        | --          | --          | 1           | --            | <b>1</b>      |
| Welsh Corgi                         | --          | 2           | --          | <b>&lt; 1</b> | <b>&lt; 1</b> |
| <b>Other breed groups</b>           |             |             |             |               |               |
| Great Dane                          | --          | 8           | 8           | <b>&lt; 1</b> | <b>7</b>      |
| Catahoula                           | --          | 2           | 4           | --            | <b>3</b>      |
| Dachshund                           | 4           | 2           | 2           | <b>1</b>      | <b>2</b>      |
| Chihuahua                           | 4           | 2           | 1           | <b>1</b>      | <b>2</b>      |
| American Cocker Spaniel             | --          | --          | 2           | --            | <b>1</b>      |
| <b>(b) Sex</b>                      |             |             |             |               |               |
| <b>male</b>                         | 39          | 56          | 55          | <b>51</b>     | <b>53</b>     |
| <b>female</b>                       | 61          | 44          | 45          | <b>49</b>     | <b>47</b>     |
| <b>(c) Site of acquisition</b>      |             |             |             |               |               |
| <b>rescue</b>                       | 57          | 46          | 59          | <b>8</b>      | <b>55</b>     |
| <b>breeder</b>                      | 9           | 5           | 2           | <b>47</b>     | <b>4</b>      |
| <b>private</b>                      | < 1         | 16          | 4           | <b>42</b>     | <b>7</b>      |
| <b>no response<sup>a</sup></b>      | 34          | 33          | 34          | <b>3</b>      | <b>34</b>     |
| <b>(d) Other dog(s) at home</b>     |             |             |             |               |               |
| <b>yes</b>                          | 83          | 70          | 85          | <b>62</b>     | <b>80</b>     |

362 In the list of breeds, the “x” symbols mean “mixed with”. Breed names without “x” symbol  
 363 are for purebred breeds. “--” means that no dog was concerned.

364 <sup>a</sup> “no response” was for owners who did not respond to the optional question regarding the  
 365 site of acquisition of their dog.

## 367 **Sex**

368 The frequencies of males and females for each group are listed in **Table 3b**. The group with  
369 the highest frequency of females (HNVI = 61%) did not significantly differ from that with the  
370 lowest frequency (HIVN = 44%;  $X^2 = 1.82$ ,  $p = 1.0$ ). Overall, males and females were  
371 likewise balanced in all groups. Thus, differences between genders in health troubles,  
372 aggressiveness, interspecific communication and cooperative activities (*e.g.*, [26]) may have  
373 been equally compensated for in all groups.

## 374 **Site of acquisition**

375 Owners were free to respond to the following optional question: “Site of acquisition of your  
376 dog – where does your dog come from?” The response choices were:

- 377 ● a rescue centre or a foster program
- 378 ● a professional, registered breeder
- 379 ● a private individual or a non-registered breeder.

380 The response frequencies obtained for each group are provided in **Table 3c**. No  
381 response was given for 34% of the sensory impaired dogs and 3% of the sensory normal ones.  
382 According to the responses for the 358 remaining dogs, sensory impaired dogs mostly came  
383 from rescues/fosters, while sensory normal dogs came from either professional, registered  
384 breeders or private individuals/non-registered breeders. The numerous missing responses and  
385 the low frequency of “professional breeder” responses for sensory impaired dogs can easily  
386 be explained. As described in the Introduction, both the sensory impairments and the  
387 morphological abnormalities (see section “Morphology” below) of these dogs result from  
388 inopportune, sometimes illegal, breeding practices. Consequently, these dogs cannot officially  
389 be sold by registered breeders.

## 390 **Presence of congeners at home**

391 Owners were asked to indicate whether they had other dog(s) at home than that concerned by  
392 their participation in the survey. This question was asked because many rescue centres and  
393 foster programs that propose sensory impaired dogs for adoption recommend the presence of  
394 at least one sensory normal dog at the adopter's home. According to these rescues/fosters, the  
395 sensory normal dog is expected to become a "referent" for the sensory impaired dog  
396 concerning various aspects of life, such as, for example, spatial exploration and interactions.  
397 The responses obtained for each group are presented in **Table 3d**. Significantly more sensory  
398 impaired than sensory normal dogs were reported as living with congeners (frequencies =  
399 80% and 62%, respectively;  $X^2 = 17.55$ ,  $p = 0.002$ ). This difference may be explained by the  
400 above-mentioned recommendation, provided that many sensory impaired dogs were adopted  
401 from rescues/fosters. An additional, related explanation is that the adoption of a sensory  
402 impaired dog needs prior experience in dog-human communication and dog training. As a  
403 result, sensory impaired dogs are more frequently adopted by persons that already have had,  
404 or presently have, dogs. However, we have no hypothesis as to whether the presence of  
405 congeners at home could have differently affected the responses for sensory impaired and  
406 sensory normal dogs for the various data compared below. This point is therefore not  
407 analysed in further detail.

## 409 **Determination of sensory impairments**

### 410 **Severity of the impairment**

411 As mentioned above, owners were asked to report the sensory status of their dog, at each ear  
412 and each eye separately, by choosing one of three possible responses:

- 413 ● normal
- 414 ● partially impaired
- 415 ● totally impaired (deaf/blind).

416 **Table 4** shows how the responses were used to provide a “severity” score to hearing  
417 and vision impairments. Scores 1 and 2 mean that the impairment is unilateral. Scores 3 and 4  
418 mean that both ears/eyes are impaired but at possibly different degrees. Score 5 means that  
419 the impairment is both total (*i.e.*, deafness/blindness) and bilateral.

420 **Table 4. Score of severity of hearing and vision impairments determined from owners’**  
421 **responses to the sensory status of their dog at each ear/eye.**

| Score of severity | Sensory status at one ear/eye | Sensory status at the other ear/eye |
|-------------------|-------------------------------|-------------------------------------|
| 1                 | normal                        | partially impaired                  |
| 2                 | normal                        | totally impaired                    |
| 3                 | partially impaired            | partially impaired                  |
| 4                 | partially impaired            | totally impaired                    |
| 5                 | totally impaired              | totally impaired                    |

422 The left panel in **Fig 2a** shows the distributions of severity scores for the two hearing  
423 impaired groups. Scores were equally distributed in the two groups (mean scores of severity  $\pm$   
424 1 standard deviation for HIVN and HIVI groups =  $4.6 \pm 0.9$  and  $4.8 \pm 0.7$ , respectively). Most  
425 hearing impaired dogs were reported as being bilaterally deaf (frequencies of score 5 for  
426 HIVN and HIVI groups = 81% and 87%, respectively). The right panel in **Fig 2a** shows the  
427 distributions of severity scores for the two vision impaired groups. Only 25% of the vision

428 impaired dogs were reported as being bilaterally blind. Thus, most vision impaired dogs had  
429 residual, unilateral or bilateral, vision. The two vision impaired groups showed no clear  
430 difference in score distributions, in spite of the trend for score 3 to be slightly more frequent  
431 for the HIVI group (mean scores of severity  $\pm$  1 standard deviation for HNVI and HIVI  
432 groups =  $3.3 \pm 1.5$  and  $3.4 \pm 1.3$ , respectively).

433 **Fig 2. Frequencies of responses, in percentages, obtained for hearing impaired groups**  
434 **(left panels) and for vision impaired groups (right panels) for the following data: (a)**  
435 **score of severity of the impairment, (b) type of diagnosis test, and (c) operator of the**  
436 **subjective test.** HNVI = hearing normal vision impaired (grey), HIVN = hearing impaired  
437 vision normal (orange), HIVI = hearing impaired vision impaired (red).

#### 438 **Diagnosis test**

439 Owners who reported sensory impairment(s) in their dog were asked to indicate whether the  
440 impairment(s) had been diagnosed using either:

- 441 ● objective testing (*i.e.*, BAER test in certified clinic for hearing; Canine Eye Registration  
442 Foundation – CERF – or equivalent standardised ophthalmic test in certified clinic for vision)
- 443 ● subjective testing (*i.e.*, someone produced sounds/visual signals and observed the dog’s  
444 reaction to these signals).

445 For vision impairments, an additional response choice was available:

- 446 ● “diagnosis of vision impairment just based on abnormal eye(s) aspect”. This response was  
447 for dogs having severe ophthalmic abnormalities, such as for example no eyeball, which  
448 noticeably affect visual function (see pictures of vision impaired dogs in **S1 Fig**; see also  
449 section “Ophthalmic abnormalities” below).

450 The responses obtained for hearing impaired and vision impaired groups are presented  
451 in the left and right panels of **Fig 2b**, respectively. Sensory impairments were seldomly  
452 diagnosed using objective testing (frequencies of BAER tested dogs for HIVN and HIVI

453 groups = 17% and 8%, respectively; frequencies of CERF-like tested dogs for HNVI and  
454 HIVI groups = 17% and 29%, respectively). The finding that hearing impaired dogs were  
455 mostly diagnosed using subjective testing can easily be explained by the small number of  
456 veterinary clinics that propose BAER testing (see [19] for United States of America and  
457 several other countries; see [https://www.centrale-canine.fr/lofselect/actualites/la-surdite-](https://www.centrale-canine.fr/lofselect/actualites/la-surdite-comment-la-depister)  
458 [comment-la-depister](https://www.centrale-canine.fr/lofselect/actualites/la-surdite-comment-la-depister) for France). Vision impairments were almost equally diagnosed from  
459 CERF-like testing, subjective testing and aspect of the eye(s).

## 460 **Operator of the subjective test**

461 Owners who responded that the sensory impairment(s) of their dog had been diagnosed using  
462 subjective testing were asked to indicate who had conducted that subjective test by choosing  
463 one the following responses:

- 464 ● a veterinary
- 465 ● an employee or a volunteer in a rescue centre/foster
- 466 ● the owner of the dog (themselves)
- 467 ● the breeder of the dog.

468 The responses obtained for hearing impaired and vision impaired groups are presented  
469 in the left and right panels of **Fig 2c**, respectively. Subjective testing was performed by a  
470 veterinary in 61 to 67% of the cases. Subjective testing was otherwise more frequently  
471 performed by owners to evaluate vision than to evaluate hearing. Accordingly, unilateral  
472 and/or partial impairments are more easily noticeable when they concern vision. Unilateral  
473 hearing impairments mainly affect sound source localisation while having less noticeable  
474 effect on sound detection. Unilateral – and/or partial – vision impairments affect the  
475 stereoscopic processing of space, objects, human gestures, *etc*, which has a visible impact on  
476 both the motion and the posture of the dog. Moreover, subjective testing of monocular vision

477 is much easier to conduct than subjective testing of monaural hearing. A visual source  
478 presented on the edge of the visual field can exclusively be processed by the ipsilateral eye.  
479 Conversely, a sound reaches the two ears regardless of the spatial position from which it is  
480 presented. This explains why BAER testing is currently the only test of unilateral hearing  
481 impairments. However, it should be mentioned that most clinical BAER tests use a single  
482 sound (*e.g.*, a click) presented at either fixed or few different level(s), which does not allow  
483 assessing partial hearing impairments at one ear. This could possibly explain in part with it is  
484 often stated that congenital hearing impairments in dogs can be unilateral but are always total  
485 in the impacted ear [27].

#### 486 **Stimuli and conditions of the subjective test**

487 The 171 owners who indicated that the hearing impairment of their dog had been diagnosed  
488 using subjective testing were asked to “describe in a few words what the test consisted of”.  
489 This open question was asked in order to get insight on the sounds, sites and conditions of the  
490 subjective tests that are performed in the numerous dogs that have no access to BAER testing.  
491 In total, 109 responses were unexploitable, because either the subjective test had been  
492 conducted prior to adoption of the dog by the respondent or the response given was too vague  
493 (*e.g.*, “my vet made different noise to observe my dog’s reaction”, “my dog has never reacted  
494 to any sound”, *etc*).

495         According to the 62 exploitable responses, most sounds used in subjective testing of  
496 hearing were natural sounds. These natural sounds were produced by either  
497 clapping/snapping/banging hands or fingers (22 responses), shaking/striking/dropping on the  
498 floor a metal object (12 responses), calling/talking to the dog out loud (11 responses), ringing  
499 a doorbell or an alarm (5 responses), producing whistles (5 responses), using a clicker (1  
500 response) or a tuning fork (1 response), or turning on a vacuum cleaner (1 response). Seven



501 other respondents indicated that sounds were produced using an automated device, such as a  
502 smartphone application or an audiometer, which allowed playing tonal or narrowband  
503 “artificial” sounds of different frequencies at several levels. On the subject of the test  
504 conditions, 14 respondents indicated that sounds were intentionally produced while the dog  
505 was sleeping. These 14 dogs were considered as hearing impaired because the presented  
506 sound(s) did not wake them up. Regardless of dog arousal, sounds were produced either very  
507 close to the dog’s ear (7 responses) or out of sight from several locations and distances (18  
508 responses). Only one respondent mentioned occlusion of one ear during sound presentation,  
509 but without specifying how exactly the ear had been occluded.

## 510 **Morphology**

511 The survey was specifically addressed to owners of dogs with no or congenital sensory  
512 impairments. As detailed in the Introduction, most congenital impairments in dogs are  
513 associated with genetic-related deletion of pigments in hair and irises. Below, we therefore  
514 assessed to what extent sensory impairments were associated with discolouration of the coat  
515 and irises. Ophthalmic abnormalities, which are consistently reported in dogs with mutation  
516 of one pigment deletion gene, namely in homozygous Merles, were also assessed.

### 517 **Excess white coat**

518 Owners were asked to indicate what surface of the dog’s coat was white, on the body and  
519 head separately, by choosing one of the following responses:

- 520 ● less than 50%
- 521 ● between 50 and 75%
- 522 ● more than 75%.

523 Because all dogs belonged to breeds whose standard coat includes only minor areas of white,  
524 dogs reported as having 50% or more of white were considered as “excess white”.

525 The results obtained for each group for the body and head are presented in **Fig 3a** and  
526 **Fig 3b**, respectively. Few sensory normal dogs (frequencies for the HNVN group  $\approx 10\%$ ) but  
527 most sensory impaired dogs (frequencies for HNVI, HIVN and HIVI groups ranging from  
528 74% to 97%) had excess white coat. There was a non-significant trend for higher frequencies  
529 for the HIVI group than for HNVI and HIVN groups ( $X^2 \leq 9.75$ ,  $p \geq 0.07$ ). Pictures of 88  
530 dogs sent by their owners can be seen in **S1 Fig** as illustrative examples of the coat colours  
531 most frequently reported for each group.

532 **Fig 3. Frequencies of responses, in percentages, obtained for each group for the**  
533 **following morphological data: (a) excess white coat on body, (b) excess white coat on**  
534 **head, (c) discoloured or indiscernible iris, (d) ophthalmic abnormalities.** HNVI = hearing  
535 normal vision impaired (grey), HIVN = hearing impaired vision normal (orange), HIVI =  
536 hearing impaired vision impaired (red), HNVN = hearing normal vision normal (green), ns =  
537 not significant. Horizontal brackets show two-by-two comparisons assessed using Chi<sup>2</sup> tests.

### 538 **Iris colour**

539 Owners were asked to indicate whether the colours of the left and right irises of their dog  
540 were either:

- 541 ● normal for the breed standard (*e.g.*, brown, green, deep blue)
- 542 ● discoloured to extreme light blue
- 543 ● indiscernible (due to absence of eyeball, covering by eyelid or membrane, *etc.*).

544 The frequencies of dogs with discoloured or indiscernible iris were assessed regardless of  
545 whether the “discoloured” or “indiscernible” response was selected for one or both eyes.

546 The results obtained for each group are provided in **Fig 3c**. Few sensory normal dogs  
547 (frequency = 12%) but most sensory impaired dogs (frequencies  $> 80\%$ ) had discoloured or  
548 indiscernible iris. Frequencies were similar for the two vision impaired groups (91% and

549 96%, respectively;  $X^2 = 1.20$ ;  $p = 1.0$ ), and were slightly lower for HIVN group (81%;  
550 comparison with HIVI group:  $X^2 = 13.16$ ,  $p = 0.01$ ; comparison with HNVI group:  $X^2 = 1.32$ ,  
551  $p = 1.0$ , *ns*).

## 552 **Ophthalmic abnormalities**

553 Owners were asked to indicate whether their dog had, at the left and right eyes separately, the  
554 following ophthalmic abnormalities:

- 555 ● microphthalmia
- 556 ● misshapen pupil
- 557 ● cataract
- 558 ● absence of eyeball
- 559 ● other than those mentioned above
- 560 ● the dog has no, listed or “other”, ophthalmic abnormalities.

561 Multiple responses were allowed. The list was based on pilot data on 40 excess white dogs  
562 collected by the second author and their veterinaries, and was followed by a field for manual  
563 report of the type(s) of “other”, non-listed, ophthalmic abnormalities.

564 The frequencies of dogs having at least one ophthalmic abnormality, regardless of  
565 whether this was at one or both eyes, are presented for each group in **Fig 3d**. Ophthalmic  
566 abnormalities were seldom for the HNVI group (frequency = 8%) but were extremely  
567 frequent for vision impaired groups (frequencies for HNVI and HIVI groups = 83% and 91%,  
568 respectively). There was no statistical difference between the two vision impaired groups ( $X^2$   
569 = 1.30,  $p = 1.0$ ). Compared to vision impaired groups, the HIVN group showed ophthalmic  
570 abnormalities to a significantly smaller frequency (30%;  $X^2 \geq 18.75$ ,  $p \leq 0.0005$ ).

571 **Fig 4** shows the frequencies at which each ophthalmic abnormality was reported for  
572 sensory impaired groups. There was no difference between the two vision impaired groups

573 (HNVI vs. HIVI:  $X^2 \leq 1.45$ ,  $p = 1.0$ ). For these two groups, the most frequent abnormality  
 574 was microphthalmia (frequencies = 70% and 64%, respectively), followed from afar by  
 575 misshapen pupil, cataract, absence of eyeball, and “other” (frequencies ranging from 12% to  
 576 27%). The HIVN group significantly differed from either one or both vision impaired groups  
 577 in the responses relative to microphthalmia ( $X^2 \geq 29.39$ ,  $p \leq 0.0001$ ), cataract ( $X^2 \geq 8.54$ ,  $p \leq$   
 578  $0.02$ ) and absence of eyeball ( $X^2 = 9.10$ ,  $p = 0.03$ ), but not in those relative to misshapen pupil  
 579 ( $X^2 \leq 3.94$ ,  $p = 1.0$ ) and “other” ophthalmic abnormalities ( $X^2 \leq 4.45$ ,  $p = 1.0$ ). **Table 5** details  
 580 the types of “other” ophthalmic abnormalities manually reported by owners.

581 **Fig 4. Frequencies of responses, in percentages, obtained for each sensory impaired**  
 582 **group for the following ophthalmic abnormalities: (a) microphthalmia, (b) misshapen**  
 583 **pupil, (c) cataract, (d) absence of eyeball, and (e) other.** HNVI = hearing normal vision  
 584 impaired (grey), HIVN = hearing impaired vision normal (orange), HIVI = hearing impaired  
 585 vision impaired (red), ns = not significant. Horizontal brackets show the two-by-two  
 586 comparisons that were statistically assessed using Chi<sup>2</sup> tests.

587 **Table 5. Raw number of dogs from sensory impaired groups obtained for each “other”**  
 588 **ophthalmic abnormalities as manually reported by owners.**

|                                 | HNVI | HIVN | HIVI |
|---------------------------------|------|------|------|
| <b>coloboma</b>                 | --   | 1    | 3    |
| <b>corectopia</b>               | --   | 1    | 3    |
| <b>detached retina</b>          | --   | --   | 3    |
| <b>dropped or fixated pupil</b> | --   | --   | 5    |
| <b>entropion or ectropion</b>   | --   | --   | 8    |
| <b>glaucoma</b>                 | --   | --   | 3    |
| <b>strabismus</b>               | --   | 1    | --   |
| <b>unspecified</b>              | 3    | 3    | 10   |

589 Abnormalities are listed in alphabetic order. The “unspecified” response was for owners who  
 590 responded "other ophthalmic abnormality than those mentioned above" but without  
 591 specifying the exact type of the abnormality(s). The “--” symbol means that no dog was  
 592 concerned.

## 594 **Possible genetic cause**

595 All the ophthalmic abnormalities that are depicted in **Fig 4** and **Table 5** are frequently  
596 observed in homozygous Merles [7], but are not associated with the two other pigment  
597 deletion genes that are possibly present in the breeds under study (piebald, Irish spotting).  
598 Among the 160 vision impaired dogs (23 HNVI, 137 HIVI), 131 (82%) had excess white  
599 heads, discoloured or indiscernible iris(es), and ophthalmic abnormalities. Thus, we suggest  
600 that these 131 dogs were likely double Merles, although few of them have been directly tested  
601 as double Merles on the M locus (9) or at least bred from two parents with Merle phenotype  
602 according to their owners (38).

## 603 **Health troubles**

604 Owners were asked to indicate whether their dog had ever suffered from the following type(s)  
605 of health trouble:

- 606 ● neurological (*e.g.*, seizure, epilepsy, *etc.*)
- 607 ● heart (*e.g.*, heart murmur, malformation, *etc.*)
- 608 ● bones/joints (*e.g.*, dysplasia, *etc.*)
- 609 ● skin
- 610 ● digestive
- 611 ● other than those mentioned above
- 612 ● the dog has never suffered of any, listed or “other”, health troubles.

613 Multiple responses were allowed. The list was based on both assumptions on the poor health  
614 of double Merles (see Introduction) and unpublished data from a survey of 110 presumed  
615 double Merle owners conducted by the second author. The list was followed by a field for  
616 manual report of “other”, non-listed, troubles. To note, assumptions predict that double

617 Merles also have issues in their reproductive systems [5]. This point has not been investigated  
618 in the present study because many excess white dogs with congenital sensory impairments are  
619 neutered early so as to avoid at-risk breeding.

620 **Fig 5a** presents the frequencies of dogs, for each group and for the IMP cohort, with  
621 no health trouble reported. These dogs are labelled below as “healthy”. **Fig 5b-5g** present the  
622 frequencies at which the different types of health troubles were reported for the remaining  
623 dogs.

624 **Fig 5. Frequencies of responses, in percentages, obtained for each group and for the**  
625 **IMP cohort for the following health troubles: (a) none, (b) neurological, (c) heart, (d)**  
626 **bones/joints, (e) skin, (f) digestive, and (g) other.** The ordinate width is larger in panel (a)  
627 than in panels (b) to (g). HNVI = hearing normal vision impaired (grey), HIVN = hearing  
628 impaired vision normal (orange), HIVI = hearing impaired vision impaired (red), HNVN =  
629 hearing normal vision normal (green), IMP = impaired (HNVI, HIVN and HIVI gathered,  
630 purple), ns = not significant. Horizontal brackets show comparisons between HNVN and IPM  
631 assessed using Chi<sup>2</sup> tests.

### 632 **Healthy dogs**

633 Seventy-five percent of the sensory normal dogs showed no health trouble according to their  
634 owners and were therefore considered as healthy (see **Fig 5a**). Similar results have been  
635 previously reported for comparable breeds in a survey at large scale (*e.g.*, 65% to 75% of  
636 “unaffected” dogs within groups of 1,005 Border Collies, 360 Shetland Sheepdogs, and 785  
637 Dachshunds; frequency of unaffected dogs within the group of 71 Australian Shepherds not  
638 provided; [23]). Fifty-nine percent of the sensory impaired dogs were healthy, which  
639 significantly differs from sensory normal dogs ( $X^2 = 11.86, p = 0.02$ ).

### 640 **Neurological troubles**

641 **Fig 5b** shows the frequencies of neurological troubles reported by owners for each group and  
642 for the IMP cohort. Overall, neurological troubles were reported for 6.8% of the entire

643 sample. This percentage is substantially higher than those reported in a past survey of about  
644 43,000 dog owners for a large number of diseases of the nervous system (prevalence  $\leq 1\%$ ,  
645 [23]). However, data comparison between the two studies is rendered difficult by several  
646 differences. First, Australian Shepherds and Border Collies represented less than 3% of Wiles  
647 and colleagues' sample while representing 82% of the present sample. Second, the survey by  
648 Wiles and colleagues exclusively revolved around health, and listed more than 700 specific  
649 diseases. In the present study, the section on health troubles was only one of a seven-section  
650 questionnaire, and listed only six main categories of health troubles. The two studies had very  
651 distinct goals. The study by Wiles and colleagues aimed to quantify the prevalence, across  
652 and within breeds, of a variety of specific diseases in the general population of domestic dogs.  
653 The small health section in the present study was designed only to assess the veracity of the  
654 following assumption: excess white dogs, particularly double Merles, suffer from severe  
655 neurological, heart and bones/joints troubles. The present study is therefore not further  
656 compared below to that by Wiles and colleagues.

657         If both the above-mentioned assumption and our suggestion that at least 131 of the  
658 sensory impaired dogs in the sample were double Merles were true, then the frequency of  
659 neurological troubles reported for sensory impaired dogs (HNVI = 9%, HIVN = 2%, HIVI =  
660 15%, IMP = 11%) should have been higher. However, neurological troubles were  
661 significantly less frequently reported for sensory normal dogs (3%) than for sensory impaired  
662 ones ( $X^2 = 11.07$ ,  $p = 0.04$ ). Whether – and to what extent – this difference is related to the  
663 double Merle genotype, as suggested by the assumption, is undetermined. Reports of  
664 neurological troubles indeed mainly concerned vision impaired, possibly double Merle, dogs.  
665 Among the 131 dogs presumed above to be double Merles according to their morphological  
666 data, 19 (14.5%) had neurological troubles. On the other hand, only two of the 16 sensory  
667 impaired dogs that have been tested on the M locus as double Merles showed neurological

668 troubles. Below, we propose two possible, complementary explanations as to why  
669 neurological troubles were more frequently reported for sensory impaired dogs than for  
670 sensory normal ones.

### 671 **Undiagnosed MDR1-related drug sensitivity**

672 All except three of the 31 dogs for which neurological troubles were reported (25 sensory  
673 impaired, 6 sensory normal) were Australian Shepherds, Border Collies or Rough Collies. As  
674 mentioned in the Introduction, mutation of the MDR1 gene is frequent in these breeds [14-  
675 15]. This mutation prevents the blood-brain barrier from blocking chemical agents at the  
676 entrance of the central nervous system. As a result, commonly administered drugs (including  
677 antibiotics, anti-diarrheal, parasite control products, pain medications, sedatives and  
678 tranquilisers) that rouse no deleterious reaction in dogs with normal MDR1 elicit severe  
679 neurological symptoms (*i.e.*, seizure, tremors, disorientation) in dogs with mutated MDR1.

680 Owners were asked to indicate whether their dogs had been tested for the MDR1 gene,  
681 and, if so, whether the result indicated either normal or – heterozygous or homozygous –  
682 mutated allele(s). The frequency of dogs tested for MDR1 was low in the entire sample  
683 (26%), and was significantly lower for sensory impaired than for sensory normal dogs (14%  
684 and 38%, respectively;  $\chi^2 > 50$ ,  $p < 0.00001$ ). The few impaired and normal dogs that have  
685 been tested showed statistically similar frequencies of MDR1 mutation, and hence of drug  
686 sensitivity (19% and 31%, respectively;  $\chi^2 = 1.60$ ,  $p = 1.0$ ). The smaller frequency of MDR1  
687 testing for sensory impaired dogs that possibly have ophthalmic abnormalities, sensitivity of  
688 the skin and eyes to UVs, *etc.*, could be explained by the numerous veterinary exams (sensory  
689 impairment diagnosis, ophthalmological tests, *etc.*) and specific equipment (sunglasses,  
690 vibrating collar, *etc.*) that their owners and rescue centres already incur. Testing these dogs  
691 for the MDR1 mutation could possibly be considered as being of secondary importance.



692 In summary, we suggest that an undetermined part of the dogs from the entire sample  
 693 could have been undiagnosed for MDR1-related drug sensitivity. The greater report of  
 694 neurological troubles for sensory impaired dogs than for sensory normal ones could be  
 695 partially accounted for by their lower frequency of MDR1 testing, and hence by a greater risk  
 696 of “missing” their drug sensitivity. Accordingly, **Table 6** presents summary data for the 25  
 697 sensory impaired dogs for which neurological troubles were reported. Only three of them  
 698 have been MDR1 tested.

699 **Table 6. Summary data for the 25 sensory impaired dogs for which neurological**  
 700 **troubles were reported by their owners.**

| Group | Breed   | Age (yrs) | Excess white body/head | Abn. of iris(es) colour | Oph. abn. | Objective indication for double Merle | MDR1 tested  | OCD diagnosed |
|-------|---------|-----------|------------------------|-------------------------|-----------|---------------------------------------|--------------|---------------|
| HNVI  | AS      | 5.9       | Y/Y                    | Y                       | N         | ?                                     | N            | N             |
| HNVI  | CHI     | 2.4       | Y/Y                    | Y                       | N         | 2 parents are Merle                   | N            | N             |
| HIVN  | AS      | 6.6       | Y/Y                    | Y                       | N         | ?                                     | N            | N             |
| HIVN  | BC      | 1.1       | Y/Y                    | Y                       | Y         | Dog is M/M                            | <b>Y neg</b> | <b>Y</b>      |
| HIVI  | AS      | 6.7       | Y/Y                    | Y                       | Y         | ?                                     | N            | N             |
| HIVI  | GD      | 3.8       | Y/Y                    | Y                       | Y         | 2 parents are Merle                   | N            | N             |
| HIVI  | RC      | 7.6       | Y/Y                    | Y                       | Y         | ?                                     | N            | N             |
| HIVI  | AS      | 2.0       | Y/Y                    | Y                       | Y         | ?                                     | N            | N             |
| HIVI  | AS      | 9.6       | Y/Y                    | Y                       | Y         | Dog is M/M                            | N            | N             |
| HIVI  | BC      | 4.1       | Y/Y                    | Y                       | Y         | ?                                     | N            | N             |
| HIVI  | AS      | 6.3       | N/N                    | Y                       | Y         | ?                                     | N            | <b>Y</b>      |
| HIVI  | AS      | 9.5       | Y/N                    | Y                       | Y         | ?                                     | N            | <b>Y</b>      |
| HIVI  | AS      | 1.6       | Y/Y                    | Y                       | N         | ?                                     | N            | <b>Y</b>      |
| HIVI  | AS      | 1.0       | Y/Y                    | Y                       | Y         | ?                                     | N            | N             |
| HIVI  | BC      | 2.5       | Y/Y                    | Y                       | Y         | ?                                     | N            | <b>Y</b>      |
| HIVI  | AS      | 3.2       | Y/Y                    | Y                       | Y         | ?                                     | N            | N             |
| HIVI  | AS x ?  | 1.3       | Y/Y                    | Y                       | Y         | ?                                     | N            | N             |
| HIVI  | AS      | 1.0       | Y/Y                    | Y                       | Y         | ?                                     | <b>Y neg</b> | N             |
| HIVI  | AS      | 1.9       | Y/Y                    | Y                       | Y         | ?                                     | N            | <b>Y</b>      |
| HIVI  | AS      | 7.7       | Y/Y                    | Y                       | Y         | ?                                     | N            | N             |
| HIVI  | AS x BC | 1.2       | N/Y                    | Y                       | Y         | ?                                     | N            | N             |
| HIVI  | CAT     | 2.9       | Y/Y                    | Y                       | Y         | ?                                     | N            | N             |
| HIVI  | AS x BC | 4.0       | Y/Y                    | Y                       | Y         | 2 parents are Merle                   | N            | N             |
| HIVI  | BC x ?  | 2.2       | Y/Y                    | Y                       | Y         | ?                                     | N            | N             |
| HIVI  | BC      | 3.0       | Y/Y                    | Y                       | Y         | ?                                     | <b>Y neg</b> | N             |

701 Abn = abnormalities/abnormal. Oph = ophthalmic. AS = Australian Shepherd. BC = Border  
 702 Collie. CHI = Chihuahua. GD = Great Dane. RC = Rough Collie. ? = unknown. Y = yes. N =  
 703 no. neg = negative (no drug sensitivity related to MDR1 mutation).

704 Data incompatible with the hypothesis that the dog is double Merle are underlined. Data  
705 incompatible with our hypothesis that neurological troubles have been confounded with  
706 undiagnosed MDR1 drug sensitivity or undiagnosed OCDs are emboldened.

### 707 **Undiagnosed compulsive behaviours**

708 During the last three years, the second author has regularly followed the 40 congenitally  
709 sensory impaired dogs that have been rescued by and adopted from her organisation. She has  
710 observed behavioural stereotypes, often referred to as obsessive compulsive disorders  
711 (OCDs), in many of the dogs followed. For example, several dogs exhibited compulsive  
712 spinning, circling, tail chasing, star gazing, excessive barking, *etc* (see examples in first part  
713 of **S1 Video**). We suggest that when these types of behaviours are verbally described by  
714 owners to veterinaries or dog trainers/behaviourists, they can be considered, in foremost  
715 instance, as being possibly symptomatic of a neurological disorder. Accordingly, the first part  
716 of **S1 Video** shows the compulsive behaviours of two sensory impaired dogs. Both dogs were  
717 foremost considered as exhibiting neurological signs, which has finally been refuted by  
718 adequate medical screening. More importantly, both dogs showed no more compulsive  
719 behaviour after behavioural adjustments of their owners to their sensory impairments, as  
720 instructed by the second author (see second part of **S1 Video**). In other words, we suggest that  
721 OCDs are frequent in sensory impaired dogs, so that an undetermined part of their reported  
722 neurological troubles could have been confounded with undiagnosed OCDs. Accordingly, it  
723 can be seen in **Table 6** that OCDs have been diagnosed (see details in “Behavioural troubles”  
724 section below) in only six of the 25 sensory impaired dogs for which neurological troubles  
725 were reported.

## 727 **Heart and bones/joints troubles**

728 Excess white, double Merle dogs are assumed to also frequently suffer from cardiac and  
729 skeletal troubles [5]. **Fig 5c** and **5d** indicate that reports of heart and bones/joints troubles  
730 were statistically similar for sensory impaired and sensory normal cohorts (heart = 5% and  
731 1%, respectively,  $X^2 = 6.17$ ,  $p = 0.45$ ; bones/joints = 4% and 8%, respectively,  $X^2 = 2.85$ ,  $p =$   
732 1.0). Results for the vision impaired groups, that include 131 presumed double Merles, are  
733 much lower than those expected from the assumption (frequencies of heart and bones/joints  
734 troubles ranging from 0 and 7%).

## 735 **Skin, digestive and other troubles**

736 Frequencies of skin, digestive and “other” health troubles reported are presented in **Fig 5e**, **5f**  
737 and **5g**, respectively. These frequencies, ranging from 4 to 14%, were statistically similar for  
738 sensory impaired and sensory normal cohorts (skin:  $X^2 = 8.03$ ,  $p = 0.17$ ; digestive:  $X^2 = 4.15$ ,  
739  $p = 1.0$ ; other health troubles:  $X^2 = 2.89$ ,  $p = 1.0$ ), and confirmed the unpublished results from  
740 a survey of 110 owners of excess white and sensory impaired dogs. **Table 7** details the  
741 “other” troubles as manually reported by owners. Sensory impaired and sensory normal dogs  
742 mainly differed in allergies. However, neither the causes nor the symptoms of these allergies  
743 were specified by owners.

745 **Table 7. Raw numbers of IMP and HNVN dogs for each “other” (non-listed) health**  
746 **trouble as manually reported by owners.**

|                             | <b>IMP</b> | <b>HNVN</b> |
|-----------------------------|------------|-------------|
| <b>allergy</b>              | 24         | 12          |
| <b>breath trouble</b>       | 3          | --          |
| <b>hormonal trouble</b>     | 1          | 1           |
| <b>keratoconjunctivitis</b> | --         | 1           |
| <b>leishmaniasis</b>        | --         | 1           |
| <b>runt</b>                 | 1          | --          |
| <b>splenectomy</b>          | 1          | --          |
| <b>urinary incontinence</b> | --         | 2           |
| <b>urinary stones</b>       | --         | 1           |
| <b>uveitis</b>              | 1          | --          |
| <b>vaccinosis</b>           | 1          | --          |

747 Troubles are sorted in alphabetic order. The “--” symbol means that no dog was concerned.

## 748 **Behavioural troubles**

749 Owners were asked to indicate whether their dog had ever suffered from the following  
750 behavioural troubles:

- 751 ● aggressiveness
- 752 ● anxiety, including separation anxiety
- 753 ● attention deficit/hyperactivity disorder (ADHD)
- 754 ● obsessive compulsive disorder (OCD)
- 755 ● other than those mentioned above
- 756 ● the dog has never suffered of any, listed or “other”, behavioural troubles.

757 Multiple responses were allowed. This list was based on:

- 758 ● the common assumption that deaf and/or blind dogs frequently exhibit aggressiveness and  
759 anxiety (see Introduction)
- 760 ● observations of 40 sensory impaired dogs by the second author during three years (see  
761 “Undiagnosed compulsive behaviours” section above)

762 • informal discussions between the two authors and dog trainers, veterinaries and  
763 behaviourists about the behavioural troubles that are frequently observed in Australian  
764 Shepherds and Border Collies with insufficient or inadequate activities and interactions.  
765 The list was followed by a field for manual report of “other”, non-listed, troubles. **Fig 6a**  
766 presents the frequencies of dogs, for each group and for the IMP cohort, with no behavioural  
767 trouble reported. Significantly more sensory normal than sensory impaired dogs had no  
768 behavioural troubles (frequencies = 65% and 48%, respectively;  $X^2 = 13.64$ ,  $p = 0.01$ ). **Figs**  
769 **6b-6f** present the frequencies at which the different behavioural troubles were reported for the  
770 remaining dogs.

771 **Fig 6. Frequencies of responses, in percentages, obtained for each group and for the**  
772 **IMP cohort for the following behavioural troubles: (a) none, (b) aggressiveness, (c)**  
773 **anxiety, (d) obsessive-compulsive disorder (OCD), (e) attention-deficit/hyperactivity**  
774 **(ADHD), and (f) other.** The ordinate width is larger in panel (a) than in panels (b) to (f).  
775 HNVI = hearing normal vision impaired (grey), HIVN = hearing impaired vision normal  
776 (orange), HIVI = hearing impaired vision impaired (red), HNVN = hearing normal vision  
777 normal (green), IMP = impaired (HNVI, HIVN and HIVI gathered, purple), ns = not  
778 significant. Horizontal brackets show comparisons between HNVN and IMP assessed using  
779  $\text{Chi}^2$  tests.

780 Aggressiveness was likewise seldom for sensory normal and sensory impaired cohorts  
781 (frequencies = 7% and 12%, respectively;  $X^2 = 2.93$ ,  $p = 1.0$ ; see **Fig 6b**), which is opposite to  
782 the above-mentioned assumption. There is only one past study that we are aware of that  
783 compared behavioural troubles in sensory impaired and sensory normal dogs [22]. As for the  
784 present study, the authors conducted an owner survey. However, there are four main  
785 differences between the study by Farmer-Dougan and colleagues and the present one. First,  
786 the authors used a previously existing questionnaire (*i.e.*, Canine Behavioural Assessment and  
787 Research Questionnaire, C-BARQ [28]). Second, their respondents had to quantify the  
788 severity or frequency of each behavioural trouble listed using 0–4 scales. Third, the authors  
789 had no inclusion criteria regarding the type of sensory impairment (*i.e.*, congenital or late

790 onset, hereditary or acquired, sensorineural or conductive). Fourth, they investigated a much  
791 larger variety of dog breeds (see Table 3 in [22]). Farmer-Dougan and colleagues found  
792 smaller scores of aggressiveness for sensory impaired than for sensory normal dogs, which  
793 differs from the present finding of similar frequencies of aggressiveness for both cohorts.  
794 However, both studies refute the above-mentioned assumption.

795 Anxiety was likewise frequent for sensory normal and sensory impaired cohorts  
796 (frequencies = 23% and 31%, respectively;  $X^2 = 3.48$ ,  $p = 1.0$ ; see **Fig 6c**). Farmer-Dougan  
797 and colleagues found lower anxiety scores for sensory impaired than for sensory normal dogs  
798 [22]. Both studies thus refute the above-mentioned assumption. However, Farmer-Dougan  
799 and colleagues assessed the behavioural traits that are listed in the C-BARQ, while we have  
800 determined our list of behavioural troubles from common assumptions, pilot observations,  
801 and informal discussions with professionals. The behavioural data of the two studies are  
802 therefore not further compared below. The high prevalence of anxiety in our sensory normal  
803 cohort (23%) is similar to that previously reported in various breeds for three items relative to  
804 anxiety (*i.e.*, separation anxiety, fearfulness and noise sensitivity, see [29]).

805 Reports of OCDs were seldom for sensory normal dogs (frequency = 4%) but were  
806 five times more frequent for sensory impaired dogs (frequency = 19%;  $X^2 = 26.10$ ,  $p <$   
807  $0.0001$ , see **Fig 6d**). This finding is in agreement with both past observations by the second  
808 author (see examples of OCDs in the first part of **S1 Video**) and our hypothesis that part of  
809 the neurological troubles reported for sensory impaired dogs could have been confounded  
810 with – impairment-related – undiagnosed OCDs.

811 ADHDs (frequencies = 10% and 13%, respectively;  $X^2 = 64$ ,  $p = 1.0$ ; see **Fig 6e**) and  
812 “other” behavioural troubles (frequencies = 2% and 6%, respectively;  $X^2 = 5.51$ ,  $p = 0.62$ ; see  
813 **Fig 6f**) were reported at similar frequencies for sensory normal and sensory impaired cohorts.

814 **Table 8** details the “other” behavioural troubles as manually reported by owners. Excessive  
815 barking, as well as certain eating disorders (*e.g.*, pica), can be parts of compulsive behaviours.

816 **Table 8. Raw numbers of IMP and HNVN dogs for each “other” (non-listed)**  
817 **behavioural trouble as manually reported by owners.**

|                          | IMP | HNVN |
|--------------------------|-----|------|
| <b>depression</b>        | --  | 1    |
| <b>eating disorder</b>   | 7   | 3    |
| <b>excessive barking</b> | 2   | --   |
| <b>sleep disorder</b>    | 5   | --   |

818 Troubles are sorted in alphabetic order. The “--” symbol means that no dog was concerned.

819 Owners who reported behavioural troubles in their dog were asked to indicate who  
820 had “diagnosed” the trouble(s) by choosing one of the following responses:

- 821 ● a veterinary specialised in behaviour
- 822 ● a general veterinary
- 823 ● a dog trainer or a dog behaviourist
- 824 ● the owner of the dog (themselves).

825 They were also asked whether drugs had been prescribed for this/these trouble(s). The  
826 responses obtained for sensory impaired and sensory normal cohorts are presented in **Table 9**.  
827 Almost 60% of the behavioural troubles have been “diagnosed” by owners. Behavioural  
828 troubles have been otherwise diagnosed by a general veterinary (27% of sensory impaired  
829 dogs) or a dog trainer/behaviourist (33% of sensory normal dogs). Drugs have been  
830 prescribed to only 15% of the dogs with behavioural troubles. To note, the behavioural  
831 troubles of many sensory normal dogs that have been prescribed drugs have *not* been  
832 diagnosed by a veterinary.

834 **Table 9. Frequencies of responses, in percentage, obtained for IMP and HNVN dogs**  
835 **concerning behavioural troubles: (a) operator of the diagnosis and (b) drugs**  
836 **prescription.**

|                                            | IMP | HNVN |
|--------------------------------------------|-----|------|
| <b>a. Operator of the diagnosis</b>        |     |      |
| <b>veterinary specialised in behaviour</b> | 5   | 1    |
| <b>general veterinary</b>                  | 27  | 7    |
| <b>dog trainer or behaviourist</b>         | 12  | 33   |
| <b>owner</b>                               | 56  | 58   |
| <b>b. Drugs prescription</b>               |     |      |
| <b>yes</b>                                 | 16  | 15   |

837 Frequencies were assessed from the number of dogs for which behavioural troubles were  
838 reported by owners.

## 839 **Activities**

### 840 **Leisure and sport activities**

841 Owners were asked to indicate how frequently their dog was practicing each of the following  
842 leisure/sport activities:

- 843 ● canicross, bikejoring, scootering
- 844 ● agility
- 845 ● sheep herding
- 846 ● dog dancing
- 847 ● tracking of objects or persons
- 848 ● frisbee, flyball, treiball

849 This list included the activities that are mostly practiced worldwide by the breeds under study,  
850 and was followed by an open question that allowed reporting all non-listed activities. To  
851 provide their responses, owners had to select one of the following response choices:

- 852 ● several times a day



- 853 ● once a day
- 854 ● several times a week
- 855 ● once a week
- 856 ● every two weeks
- 857 ● once a month
- 858 ● less frequently than once a month
- 859 ● never.

860 We considered that the dog was practicing the activity under examination for all responses  
861 except “less frequently than once a month” and “never”.

862 **Fig 7a** presents the frequencies of dogs, for each group and for the sensory impaired  
863 groups gathered (IMP), for which no – listed or “other” – activity was reported. **Figs 7b-7h**  
864 present the response frequencies obtained for each activity. **Table 10** details the “other”  
865 activities as manually reported by owners.

866 **Fig 7. Frequencies of responses, in percentages, obtained for each group and for the**  
867 **IMP cohort for the following leisure/sport activities: (a) none, (b)**  
868 **canicross/bikejoring/scootering, (c) agility, (d) sheep herding, (e) dog dancing, (f)**  
869 **tracking of objects or persons, (g) Frisbee/flyball/treiball, and (h) other.** The ordinate  
870 width is larger in panel (a) than in panels (b) to (h). HNVI = hearing normal vision impaired  
871 (grey), HIVN = hearing impaired vision normal (orange), HIVI = hearing impaired vision  
872 impaired (red), HNVN = hearing normal vision normal (green), IMP = impaired (HNVI,  
873 HIVN and HIVI gathered, purple), ns = not significant. Horizontal brackets show  
874 comparisons between HNVN and IMP assessed using Chi<sup>2</sup> tests.

876 **Table 10. Raw numbers of IMP and HNVN dogs for each “other” (non-listed) activity as**  
 877 **manually reported by owners.**

|                      | IMP | HNVN |
|----------------------|-----|------|
| <b>Barn hunt</b>     | 2   | 1    |
| <b>Cani-roller</b>   | --  | 1    |
| <b>Cani-walk</b>     | --  | 1    |
| <b>Dog diving</b>    | 1   | --   |
| <b>Hiking</b>        | 8   | --   |
| <b>Hoopers</b>       | --  | 3    |
| <b>Jumping</b>       | 1   | --   |
| <b>Kayak</b>         | --  | 1    |
| <b>Lure course</b>   | 2   | 1    |
| <b>Nosework*</b>     | 5   | 1    |
| <b>Obedience</b>     | 2   | 13   |
| <b>Paddle</b>        | --  | 4    |
| <b>Paragliding</b>   | --  | 1    |
| <b>Parkour</b>       | 1   | 1    |
| <b>Rally-O</b>       | 3   | 2    |
| <b>Retrieving*</b>   | 1   | 2    |
| <b>Ring</b>          | --  | --   |
| <b>Seek*</b>         | 2   | --   |
| <b>Skijoring</b>     | 1   | --   |
| <b>Sled</b>          | 1   | --   |
| <b>Swimming</b>      | 6   | 8    |
| <b>Trail running</b> | 4   | 3    |
| <b>Tricks</b>        | 9   | 2    |

878 Activities are sorted in alphabetic order. Activities followed by an asterisk strongly rely on  
 879 olfactory capacities. The “--” symbol means that no dog was concerned.

880 Twenty percent of the sensory normal dogs, against 40% of the sensory impaired  
 881 dogs, were involved in absolutely no canine activity according to their owners ( $X^2 = 20.10$ ,  $p$   
 882  $= 0.0004$ ). This large difference can easily be explained by both the assumption that sensory  
 883 impaired dogs are poorly capable of practicing activities and the fact that many official  
 884 competitions in the countries under study have long been inaccessible to dogs that are sensory  
 885 impaired and/or unregistered in kennel clubs. Accordingly, the following three activities were  
 886 significantly more frequently practiced by sensory normal dogs than by sensory impaired

887 ones: canicross/bikejoring/scootering (frequencies = 24% and 9%, respectively;  $X^2 = 18.45$ ,  $p$   
888 = 0.001), agility (frequencies = 30% and 15%, respectively;  $X^2 = 14.59$ ,  $p = 0.006$ ) and sheep  
889 herding (frequencies = 13% and 3%, respectively;  $X^2 = 15.31$ ,  $p = 0.004$ ). However, the  
890 following four activities were practiced at statistically comparable frequencies by sensory  
891 normal and sensory impaired dogs: dog dancing (frequencies = 12% and 8%, respectively;  $X^2$   
892 = 1.48,  $p = 1.0$ ), tracking (frequencies = 23% and 21%, respectively;  $X^2 = 0.25$ ,  $p = 1.0$ ),  
893 frisbee/flyball/treibball (frequencies = 25% and 16%, respectively;  $X^2 = 5.76$ ,  $p = 0.56$ ) and  
894 “other” (frequencies = 22% and 17%, respectively;  $X^2 = 1.22$ ,  $p = 1.0$ ). It is noteworthy that  
895 tracking, the activity that sensory impaired dogs practiced the most, as well as three other  
896 activities listed in **Table 10** (*i.e.*, nosework, retrieving, seek), essentially rely on olfactory  
897 capacities. It is also noteworthy that 58% of the sensory impaired dogs that practiced no  
898 activity, against 36% of the sensory normal dogs that practiced no activity, exhibited  
899 behavioural troubles.

900 For each above-listed activity, owners were also asked to indicate the dog’s level in  
901 that activity by choosing one of the following responses:

- 902 ● not concerned, because response “never” or “less frequently than once a month” given  
903 above
- 904 ● just for fun, at home or during walks
- 905 ● beginner in a club
- 906 ● intermediate in a club
- 907 ● experienced in a club
- 908 ● competition/championship.

909 **Table 11** shows the frequencies of “high level” responses (*i.e.*, responses  
910 “experienced” and “competition/championship” gathered) obtained for sensory impaired and  
911 sensory normal cohorts. No general pattern emerges from these data. Compared to those for

912 sensory normal dogs, frequencies of high level responses for sensory impaired dogs were  
913 lower for agility, dog dancing and tracking, were conversely higher for frisbee, and were  
914 similar for canicross and sheep herding.

915 **Table 11. Frequencies, in percentages, of HNVN and IMP dogs for which the level in the**  
916 **activity practiced was reported as being either “experienced” or**  
917 **“competition/championship”.**

|                          | HNVN | IMP |
|--------------------------|------|-----|
| Canicross                | 6    | 5   |
| Agility                  | 30   | 18  |
| Sheep herding            | 14   | 14  |
| Dog dancing              | 12   | 6   |
| Tracking                 | 10   | 6   |
| Frisbee/flyball/treiball | 8    | 12  |

918 Frequencies were assessed from the number of dogs from each group that practice the activity  
919 at a minimum frequency of once a month.

## 920 **Assistance and therapy activities**

921 Owners were asked to indicate whether their dog was involved in assistance/therapy activities  
922 with:

- 923 ● elderly persons or groups
- 924 ● a blind person
- 925 ● a diabetic or epileptic person, with the role of detecting crises and alerting.

926 Responses indicated that no dog was engaged in activities with blind persons. Eight  
927 percent of the sensory impaired dogs, against 4% of the sensory normal dogs, were involved  
928 in therapy/assistance activities with elderly persons or groups. Only two dogs in the entire  
929 sample, both being hearing and vision impaired (HIVI), were involved with diabetic/epileptic  
930 persons. Accordingly, in the study by Farmer and colleagues, about 3% of 183 hearing and/or  
931 vision impaired dogs had therapy or working – rather than family pet – roles at home [22]. It  
932 is noteworthy that the ability of assistance dogs to detect epileptic and diabetic crises is based

933 on their ability to perceive small variations in the chemical signals produced by the human's  
934 body, and thus on their olfactory capacities.

## 935 **Interspecific communication**

936 Dogs with congenital hearing and/or vision impairments are often believed to have poorer  
937 abilities to communicate with congeners and humans. Another belief is that because they had  
938 no possibility to benefit from auditory-based vocal learning during early ontogenesis,  
939 congenitally deaf dogs are less “talkative” than sensory normal ones. The present study  
940 focused on communication with humans, provided the various social and medical roles that  
941 dogs are acknowledged to play in working activities with humans. We investigated two  
942 aspects of dog-human communication: vocalisations addressed by the dog to the owner  
943 during interactions, and communication/training signs addressed by the owner to the dog.

## 944 **Dog vocalisations**

945 Owners were asked to answer to the following question: “Is your dog talkative with you? In  
946 other words, which of the following vocalisations does your dog frequently produce in order  
947 to communicate with you?”

- 948 ● barks
- 949 ● whines, whimpers, moans
- 950 ● yelps, yaps
- 951 ● growls, grunts
- 952 ● other than those mentioned above
- 953 ● “your dog never produces any vocalisation during interactions with you”.

954 Multiple responses were allowed. This list of canine vocalisations was based on literature (see  
955 review in chapter on communication in [21]), and was followed by a field for manual report  
956 of “other”, non-listed, vocalisations.

957 The responses “no vocalisation” (9 and 4%, respectively, of sensory normal and  
958 sensory impaired cohorts) and “other” (4% of both sensory normal and sensory impaired  
959 cohorts) were infrequently chosen. **Fig 8** shows the response frequencies obtained for each  
960 vocalisation listed. Whines/whimpers/moans (frequencies = 57 to 61%) and yelps/yaps  
961 (frequencies = 39 to 48%) were reported at similar frequencies for all groups. However, barks  
962 (frequencies for HNVI, HIVN, HIVI and HNVN groups = 74, 90, 85 and 62%, respectively)  
963 and growls/grunts (frequencies = 43, 60, 46 and 30%, respectively) were significantly more  
964 frequently reported for hearing impaired dogs than for sensory normal ones ( $X^2 \geq 18.58$ ,  $p \leq$   
965 0.001). One exception to this is noted for the non-significant difference between HIVI and  
966 HNVN groups in growls/grunts ( $X^2 = 8.79$   $p = 0.12$ ). The two hearing impaired groups did  
967 not statistically differ from the HNVI group ( $X^2 \leq 3.85$ ,  $p = 1.0$ ). Thus, the present data do not  
968 confirm the assumption that congenitally deaf dogs are less talkative than sensory normal or  
969 vision impaired dogs.

970 **Fig 8. Frequencies of responses, in percentages, obtained for each group for the**  
971 **following dog vocalisations: (a) barks, (b) whines, whimpers, moans, (c) yelps, yaps, and**  
972 **(d) growls, grunts.** HNVI = hearing normal vision impaired (grey), HIVN = hearing  
973 impaired vision normal (orange), HIVI = hearing impaired vision impaired (red), HNVN =  
974 hearing normal vision normal (green), ns = not significant. Brackets show the two-by-two  
975 comparisons that were assessed using Chi<sup>2</sup> tests following visual inspection of the data.

## 976 **Human signs**

977 There are four main types of signs that humans can use to communicate with, and train, dogs:

- 978 • Gesture, which includes arm, hand, finger or object position and movement, as well as hand  
979 sign language

- 980 ● Sounds, which includes natural and artificial sounds, such as voice, whistle, clicker, *etc*
- 981 ● Touch, which includes direct touch of the dog's body with the hand or a stick, remote-
- 982 controlled vibrating collars, *etc*
- 983 ● Odours, which includes all odour sources that are manipulated by owners for interactions
- 984 with their dogs, such as smelling boxes, food pieces, clothes, *etc*.

985 Owners were asked to indicate which sign(s) they used with their dogs by choosing  
986 one response within a long list of unique signs, and combinations of two, three and four  
987 above-listed signs (see **S2 Fig**). **Fig 9** shows the responses obtained for each group. For  
988 HNVN dogs, the most frequent response was for the “classical” combination of gesture and  
989 sounds (frequency = 62%), followed from afar by the combination of all four signs  
990 (frequency = 32%). For HNVI dogs, the most frequent response was for sounds only  
991 (frequency = 48%), followed by the combination of all four signs (frequency = 26%). For  
992 HIVN dogs, the most frequent response was for gesture only (frequency = 63%), followed  
993 from afar by the combination of gesture and touch (frequency = 22%). For HIVI dogs,  
994 responses were distributed between the touch and odour combination (frequency = 38%),  
995 gesture only (23%), touch only (13%), the gesture and touch combination (12%), and the  
996 combination of all four signs (9%). In summary, “preferred” signs clearly emerged for dogs  
997 with either no or one sensory impairment, but not for dogs with both hearing and vision  
998 impairments. Gesture, either alone or in combination with another sign, was almost never  
999 used by owners of HNVI dogs, in spite of the large number of dogs with residual vision (see  
1000 right panel in **Fig 2a**). Odours were almost exclusively used by owners of HIVI dogs, in  
1001 combination with touch. Thus, odours were almost never used by owners of HNVI and HIVN  
1002 dogs as communication/training signals, in spite of the different olfaction-based activities in  
1003 which many of these sensory impaired dogs were involved.

1005 **Fig 9. For each group (panels), frequencies at which different unique signs (left) and**  
1006 **combinations of signs (right) were used by owners to communicate with their dogs.**  
1007 HNVN = hearing normal vision normal (green), HNVI = hearing normal vision impaired  
1008 (grey), HIVN = hearing impaired vision normal (orange), HIVI = hearing impaired vision  
1009 impaired (red).

## 1010 **Summary and conclusions**

1011 In this study, we addressed online an international questionnaire to owners of dogs with either  
1012 no or congenital hearing and/or vision impairments. The main goal of the study was to gain  
1013 insight on the veracity of various popular assumptions concerning congenitally sensory  
1014 impaired dogs, that often have dramatic consequences on the future of these dogs (*i.e.*, early  
1015 euthanasia, placement in rescue centres or foster programs with strict adoption criteria, or  
1016 lack of activities and interactions after adoption). In addition, we aimed to examine both the  
1017 tools used for determination, and the pigment deletion genetic causes, of the sensory  
1018 impairments.

## 1019 **Demographics**

1020 As expected, the present study compared two cohorts of congenitally sensory impaired and  
1021 sensory normal dogs, respectively, that were well matched in size, age, lifetime with owner,  
1022 breed, and sex. All breeds were possibly concerned by three genes, namely Merle, piebald  
1023 and Irish spotting, whose mutations are known to produce pigment deletion in hairs and irises  
1024 and congenital hearing impairments (plus, for Merle, ophthalmic abnormalities associated  
1025 with vision impairments). The main demographic difference found between the two cohorts  
1026 was about the site of acquisition of the dog, which was explained by the fact that the births of  
1027 congenitally sensory impaired dogs often result from irregular breeding.



## 1028 **Determination of sensory impairments**

1029 Hearing impairments were often reported as being both total and bilateral, but were  
1030 infrequently diagnosed using objective, BAER testing. Veterinary clinics that propose BAER  
1031 testing are not numerous. Most BAER tests cannot evaluate partial hearing impairments at  
1032 one ear. Owner responses indicated that subjective testing of hearing was not always  
1033 performed by a veterinary, and, regardless of the operator, never fulfilled the following three  
1034 criteria:

- 1035 ● monaural testing with total occlusion of one ear
- 1036 ● presentation of different sounds with various spectral characteristics and levels
- 1037 ● absence of non-auditory – visual and nearfield/floor vibration – cues.

1038 Therefore, we suggest that the capacity of subjective tests to accurately distinguish unilateral  
1039 from bilateral and partial from total hearing impairments, and hence the reliability of owner  
1040 reports of these hearing impairments, are low. Vision impairments were almost equally  
1041 diagnosed using objective (CERF-like) testing, subjective testing, and abnormal aspect of the  
1042 eye. Most vision impaired dogs in the sample had residual vision.

## 1043 **Morphology and possibly responsible genes**

1044 Coat with excessive white was almost systematically reported for sensory impaired dogs,  
1045 although sensory impaired and sensory normal cohorts both belonged to breeds in which the  
1046 normal, standard coat colour pattern is not predominantly white. In addition to this  
1047 discoloration of the coat, sensory impaired dogs frequently had discoloured or indiscernible  
1048 iris(es). Both findings are compatible with the hypothesis that the sensory impairments  
1049 reported had a pigment deletion genetic basis. Normally sighted but hearing impaired dogs  
1050 showed much fewer ophthalmic abnormalities than vision impaired dogs while showing  
1051 equally frequent discoloration of the coat and iris(es). Thus, vision impairments in the present

1052 sample were likely related to ophthalmic abnormalities. We explained in the Introduction that  
1053 the mutations of four canine genes, namely Merle, piebald, Irish spotting and KIT, are known  
1054 to produce pigment deletion in hairs and irises, as well as hearing impairments as a result of a  
1055 lack of pigments in the stria vascularis of the inner ear. Merle, piebald and Irish spotting are  
1056 all possibly present in the breeds examined, while KIT only occurs in German Shepherds and  
1057 is therefore not considered here. Among the three remaining genes, only Merle is additionally  
1058 associated with ophthalmic abnormalities and concomitant vision impairments. Although few  
1059 sensory impaired dogs were tested on the M locus as homozygous, double Merles, we  
1060 suggested that at least 85% of the vision impaired dogs were likely double Merles. If this  
1061 were true, then the lower number of HNVI dogs compared to that of HIVI dogs could indicate  
1062 that Merle-related hearing issues are more frequent than Merle-related vision issues.  
1063 Alternatively, many congenital ophthalmic abnormalities in double Merles are susceptible to  
1064 worsen over age, and hence to result in a growing, or even late onset, impact on vision. This  
1065 could not solely explain why so few dogs in the sample only had vision impairments, but also  
1066 why total blindness was seldomly reported. Further research is needed to quantify the exact  
1067 prevalence of excess white coat, ophthalmic abnormalities, hearing impairments and vision  
1068 impairments within a large sample of dogs of various breeds and ages that have all been  
1069 tested as homozygous for Merle and non-carriers for piebald (as no genetic test is yet  
1070 available for Irish spotting, and KIT is exclusively present in German Shepherds).

## 1071 **Health troubles**

1072 Significant differences between sensory impaired and sensory normal dogs in health troubles  
1073 were found for neurological troubles only. Based on morphological data, we have suggested  
1074 above that (i) most sensory impairments under study were related to pigment deletion gene(s),  
1075 and (ii) most vision impaired dogs – with either impaired or normal hearing – were likely

1076 double Merles. In that event, health troubles were less frequently reported for vision impaired  
1077 dogs than expected from the common assumption that double Merles suffer from  
1078 neurological, heart and bones/joints troubles. We propose that the greater report of  
1079 neurological troubles for sensory impaired dogs than for sensory normal ones may be  
1080 partially accounted for by their greater lack of diagnosis of both breed-related drug sensitivity  
1081 and impairment-related compulsive behaviours. Overall, the present data do not confirm the  
1082 above-mentioned assumption. As explained in the Introduction, this assumption essentially  
1083 results from multiple citations of a single study [5] that just contained a short statement  
1084 supported by the citations of few and outdated studies [16-18]. Further research is needed to  
1085 either refute or confirm assumptions of the poor health of double Merles. The best manner to  
1086 proceed would be to assess a detailed list of various diseases in a large number of dogs of  
1087 various breeds and ages that have all been tested as homozygous for Merle, non-carriers for  
1088 piebald and normal for MDR1, as well as diagnosed for compulsive behaviours.

## 1089 **Behavioural troubles**

1090 Aggressiveness was never reported for HNVI dogs, but was reported at similarly low  
1091 frequencies for HIVN, HIVI and HNVN dogs. Anxiety was high in all groups. These two  
1092 findings refute the common assumption that deaf and/or blind dogs exhibit greater  
1093 aggressiveness and anxiety as a result of the greater frustration caused by their sensory  
1094 impairments. Prevalence of anxiety in the entire sample is in agreement with past studies. The  
1095 only difference found between sensory impaired and sensory normal dogs in behavioural  
1096 troubles was for OCDs, which were considerably more frequent for sensory impaired dogs.  
1097 This finding is compatible with (i) pilot observations by the second author of frequent OCDs  
1098 in 40 sensory impaired dogs, and (ii) our hypothesis that undiagnosed OCDs in sensory  
1099 impaired dogs could have been foremost considered as neurological signs. Responses relative

1100 to the diagnosis and medication of behavioural troubles showed that the different behavioural  
1101 troubles reported by owners were not frequently considered to be severe enough to require  
1102 professional consultation and chemical treatment, and were otherwise treated using a non-  
1103 chemical, possibly behavioural, approach.

## 1104 **Activities**

1105 It is generally assumed that sensory impaired dogs cannot be safely and efficaciously engaged  
1106 in any activity. In the present study, a total lack of activity was twice more frequently  
1107 reported for sensory impaired dogs than for sensory normal ones. This finding likely reflects  
1108 the deleterious impact that the general assumption has on the quality of life of sensory  
1109 impaired dogs. However, the present results indicated that specific leisure activities were  
1110 practiced at either smaller or equivalent frequencies/levels by the two cohorts.  
1111 Assistance/therapy activities were even more frequently practiced by sensory impaired dogs.  
1112 In other words, contrary to the general belief, sensory impaired dogs may be as capable as  
1113 sensory normal ones of both practicing and achieving good levels of competence in the  
1114 activities in which their owners engage them. Accordingly, an increasing number of  
1115 competitions, non-competitive activities and certifications are rendered open to deaf dogs in  
1116 United States of America (see list in [19]). These positive outcomes may hopefully encourage  
1117 more owners to engage their sensory impaired dogs in canine activities, which would  
1118 ultimately reduce the difference between sensory impaired and sensory normal “inactive”  
1119 dogs. It is noteworthy that most dogs in the entire sample belonged to herding breeds, for  
1120 which the need for regular physical and mental activities to prevent behavioural troubles  
1121 related to frustration or boredom (*e.g.*, anxiety, ADHD, OCD) has largely been proven.  
1122 Greater involvement of sensory impaired dogs in activities may therefore have the beneficial  
1123 effect of reducing their behavioural troubles. Accordingly, recent studies have demonstrated

1124 the inverse relationship between engagement in activities and behavioural troubles in sensory  
1125 normal dogs [30-31].

1126 Moreover, the results indicated that sensory impaired dogs can actually be engaged in  
1127 both leisure/sport and therapy/assistance cooperative activities that rely on olfactory  
1128 capacities. There are numerous studies of olfactory capacities in dogs, due to the important  
1129 social and medical roles that these capacities can play for humans (*e.g.*, rescue of missing or  
1130 enshrouded persons, detection of cancer cells, explosives and toxic fumes, *etc.*, see review in  
1131 [21]). However, there is no data on olfactory capacities in dogs with congenital hearing  
1132 and/or vision impairments. Brain plasticity during early ontogenesis could possibly have  
1133 resulted in overdeveloping their olfactory capacities. We suggest that not solely sensory  
1134 impaired dogs should not be excluded from, but may also exhibit super normal capabilities in,  
1135 olfaction-based cooperative activities with humans. This that not mean, of course, that we  
1136 encourage at-risk breeding or births of congenitally sensory impaired dogs. Instead, we  
1137 expect that present and future research will ultimately reduce the numbers of early euthanasia,  
1138 placements in rescue centres, and adoptions in overprotective environments, of the numerous  
1139 sensory impaired puppies that are still born despite the recent developments of knowledge on  
1140 canine genetics.

## 1141 **Interspecific communication**

1142 The results indicated a trend for hearing and vision impaired dogs to produce more barks and  
1143 growls/grunts during interactions with their owners than sensory normal dogs. This finding is  
1144 opposite to the assumptions that congenitally deaf dogs are less “talkative” and that sensory  
1145 impaired dogs are less capable of communicating with their owners. However, the present  
1146 study is, to our knowledge, the first attempt to investigate vocalisations in sensory impaired  
1147 dogs. We cannot determine whether respondents to our survey actually understood the

1148 vocalisation terminology used in the questionnaire, whether the vocalisations reported  
1149 actually had interspecific communication functions, and what emotional valence and arousal  
1150 had the different vocalisations reported. Also, whether greater barking for sensory impaired  
1151 dogs is related to compulsive behavioural troubles is undetermined.

1152 Responses concerning human signs to dogs showed that owners are capable of  
1153 adapting their behaviours to the sensory status of their dogs so as to efficiently communicate  
1154 with, and train, them. Similar conclusions have previously been drawn from the results of an  
1155 owner survey [22]. The common assumption that sensory impaired dogs cannot be trained is  
1156 therefore refuted. To note, for sensory impaired dogs, olfaction was more frequently used in  
1157 canine activities than in owner communication/training signs.

## 1158 **Acknowledgments**

1159 The authors are grateful to the numerous owners who took time to fill the questionnaire, to  
1160 the administrators of social media who shared the calls for participation in the survey, and to  
1161 Thierry Legou for his intensive reading of this manuscript.

## 1162 **References**

- 1163 1. Asher L, Diesel G, Summers JF, McGrevy PD, Collins LM. Inherited defects in pedigree  
1164 dogs. Part 1: disorders related to breed standards. *Vet J.* 2009; 182(3):402-411. doi:  
1165 10.1016/j.tvjl.2009.08.033.
- 1166 2. Strain GM. The genetics of deafness in domestic animals. *Front Vet Sci.* 2015. 2(29). doi:  
1167 doi.org/13389/fvets.2015.00029.
- 1168 3. Langevin M, Synkova H, Jancuskova T, Pekova S. Merle phenotypes in dogs – *SILV* SINE  
1169 insertions from Mc to Mh. *PLoS ONE.* 2018; 13(9): doi: 11371/journal.pone.0198536.
- 1170 4. Langevin M. Merle - SINE Insertion from Mc - Mh “The Incredible Story of Merle”. 2018.  
1171 Library and Archives Canada Cataloguing in Publication. 130 pages. Available from:  
1172 <https://www.merle-sine-insertion-from-mc-mh.com/order/>.

- 1173 5. Clark LA, Wahl JM, Rees CA, Murphy KE. Retrotransposon insertion in SILV is  
1174 responsible for merle patterning of the domestic dog. *Proceedings of the National*  
1175 *Academy of Sciences of the United States of America*. 2006; 103: 1376-1381.
- 1176 6. Wong AK, Ruhe AL, Robertson KR, Loew ER, Williams DC, Neff MW. A de novo  
1177 mutation in KIT causes white spotting in a subpopulation of German Shepherd dogs.  
1178 *Anim Genet*. 2012; 44, 305–31 doi: 11111/age.12006.
- 1179 7. Bauer BS, Sandmayer LS, Grahn BH. Diagnostic Ophthalmology. *Can Vet J*. 2015. 56(7):  
1180 767–768.
- 1181 8. Gwin RM, Wyman M, Lim DJ, Ketring K, Werling K. Multiple ocular defects associated  
1182 with partial albinism and deafness in the dog. *J Am Anim Hosp Assoc*. 1980. 17:401–  
1183 408.
- 1184 9. Murphy SC, Evans JM, Tsai KL, Clark LA. Length variations within the Merle  
1185 retrotransposon of canine PMEL: correlating genotype with phenotype. *Mobile DNA*.  
1186 2018. 9:26. pmid:30123327.
- 1187 10. Ballif BC, Ramirez CJ, Carl CR, Sundin K, Krug M, Zahand A, Shaffer LG, Flores-Smith  
1188 H. The PMEL Gene and Merle in the Domestic Dog: A Continuum of Insertion Lengths  
1189 Leads to a Spectrum of Coat Color Variations in Australian Shepherds and Related  
1190 Breeds. *Cytogenet Genome Res*. 2018. doi: 10.1159/000491408.
- 1191 11. Langevin M. Unraveling the mysteries of merle. Australian Shepherd Club of America.  
1192 2019. 12 pages. Available from: [https://merle-sine-insertion-from-mc-](https://merle-sine-insertion-from-mc-mh.com/_files/200000312-8a1128a114/Unraveling%20the%20Mysteries%20of%20Merle.pdf)  
1193 [mh.com/\\_files/200000312-](https://merle-sine-insertion-from-mc-mh.com/_files/200000312-8a1128a114/Unraveling%20the%20Mysteries%20of%20Merle.pdf)  
1194 [8a1128a114/Unraveling%20the%20Mysteries%20of%20Merle.pdf](https://merle-sine-insertion-from-mc-mh.com/_files/200000312-8a1128a114/Unraveling%20the%20Mysteries%20of%20Merle.pdf).
- 1195 12. McCabe L, Griffin LD, Kinzer A, Chandler M, Beckwith JB, McCabe RB. Overo lethal  
1196 white foal syndrome; equine model of aganglionic megacolon (Hirschsprung disease).  
1197 *Am J Med Genet*. 1990. 36:336–340.
- 1198 13. Hülsmeier V-I, Fischer A, Mandigers PJJ, DeRisio L, Berendt M, Rusbridge C, Bhatti  
1199 SFM, Pakozdy A, Patterson EE, Platt S, Packer RMA, Volk HA. International Veterinary  
1200 Epilepsy Task Force’s current understanding of idiopathic epilepsy of genetic or  
1201 suspected genetic origin in purebred dogs. *BMC Vet. Res*. 2015; 11:175.
- 1202 14. Geyer J, Döring B, Godoy JR, Leidolf R, Moritz A, Petzinger E. Frequency of the nt230  
1203 (del4) MDR1 mutation in Collies and related dog breeds in Germany. *J. Vet.*  
1204 *Pharmacology and Therapeutics*. 2005; 28(6):545-51. doi: doi.org/11111/j.1439-  
1205 0531.1976.tb00313.x.
- 1206 15. Gramer I, Leidolf R, Döring B, Klintzsch S, Krämer E-M, Yalcin E, Petzinger E, Geyer J.  
1207 Breed distribution of the nt230(del4) MDR1 mutation in dogs. *Vet. J*. 2011. 189(1): 67-  
1208 71. doi: <https://doi.org/11016/j.tvjl.20106.012>.
- 1209 16. Sorsby A, Davey JB. Ophthalmic associations of dappling or merling in the coat color of  
1210 dogs. *J. Genet*. 1954.;54, 425-44.
- 1211 17. Little CC. *The Inheritance of Coat Color in Dogs*. Howell Book House, New York. 1957.
- 1212 18. Sponenberg DP, Bowling, AT. Heritable Syndrome of Skeletal Defects in a Family of  
1213 Australian Shepherd dogs. *J. Hered*. 1985; 76, 393-394.
- 1214 19. Cope Becker S. *Living with a deaf dog: A book of training advice, facts and resources*  
1215 *about canine deafness caused by genetics, aging, illness*. 2nd ed. Vonore (TN): Susan  
1216 Cope. 2017. 151 pages.

- 1217 20. Ferrara M, Alnan CRE. Congenital structural brain defects in the deaf dalmatian. Vet  
1218 record. 1983. 112: 344-6. DOI:10.1136/vr.112.15.344.
- 1219 21. Miklósi Á. 2015. Dog behaviour, evolution, and cognition. 2nd ed. Oxford (UK): Oxford  
1220 University Press.
- 1221 22. Farmer-Dougan V, Quick A, Harper K, Schmidt K. Behaviour of hearing or vision  
1222 impaired and normal hearing and vision dogs (*Canis lupus familiaris*): Not the same, but  
1223 not that different. J Vet Behav. 2014; 9(6); 316-323.
- 1224 23. Wiles BM, Llewellyn-Zaidi AM, Evans KM, O'Neill DG, Lewis TW. Large-scale survey  
1225 to estimate the prevalence of disorders for 192 Kennel Club registered breeds. Canine  
1226 Genetics and Epidemiology. 2017; 4:8. doi: 11186/s40575-017-0047-3.
- 1227 24. Gaunet F. How do guide dogs of blind owners and pet dogs of sighted owners (*Canis*  
1228 *familiaris*) ask their owners for food? Anim Cogn. 2008; 11:475-483. doi: 11007/s10071-  
1229 008-0138-3.
- 1230 25. Strain GM, Clark LA, Wahl JM, Turner AE, Murphy KE. Prevalence of deafness in dogs  
1231 heterozygous or homozygous for the Merle allele. J Vet Intern Med. 2009; 23:282–286.
- 1232 26. Scandurra A, Alterisio A, Di Cosmo A, D'Aniollo B. Behavioural and perceptual  
1233 differences between sexes in dogs: An overview. Animals. 2018; 8(151).  
1234 doi:13390/ani8090151.
- 1235 27. Strain GM. Aetiology, prevalence and diagnosis of deafness in dogs and cats. Br Vet J.  
1236 1996. 1523: 17–36.
- 1237 28. Hsu, Y. Serpell, J.A. Development and validation of a questionnaire for measuring  
1238 behavior and temperament traits in pet dogs. J Am Vet Med Assoc. 2003. 223: 1293–  
1239 1300.
- 1240 29. Tiira K, Sulkama S, Lohi H. Prevalence, comorbidity, and behavioral variation in canine  
1241 anxiety. J. Vet. Behav. 2016; 36–44. doi: <http://dx.doi.org/11016/j.jveb.2016.06.008>.
- 1242 30. Puurunen J, Hakanen E, Salonen MK, Mikkola S, Sulkama S, Araujo C, Lohi H.  
1243 inadequate socialisation, inactivity, and urban living environment are associated with  
1244 social fearfulness in pet dogs. Nature. 2020. 10:3527. doi.org/10.1038/s41598-020-  
1245 60546-w.
- 1246 31. Bennet PC, Rohlf VI. Owner-companion dog interactions: relationships between  
1247 demographic variables, potentially problematic behaviours, training engagement and  
1248 shared activities. Appl. Anim. Behav. Sci. 2007. 102: 65–84.

## 1249 **Supporting information**

1250 **S1 Fig. Screenshot of the English version of the online questionnaire.**

1251 **S2 Fig. Pictures of 55 sensory impaired and 33 sensory normal dogs from the present**  
1252 **study illustrating the most typical coat colour patterns.** Pictures are sorted by group  
1253 (HNVI, HIVN, HIVI, HNVN). Pictures of sensory impaired dogs with lesser white in the coat  
1254 are framed in red. Pictures of sensory normal dogs with excess white coat are framed in  
1255 green.



1256 **S1 Video. Compulsive behaviours of two sensory impaired dogs filmed before and after**  
1257 **behavioural adjustments by owners to the sensory impairments of their dogs.** The  
1258 “initial” compulsive behaviours of these two dogs had been foremost considered as  
1259 neurological signs prior to medical screening.

# Human signs

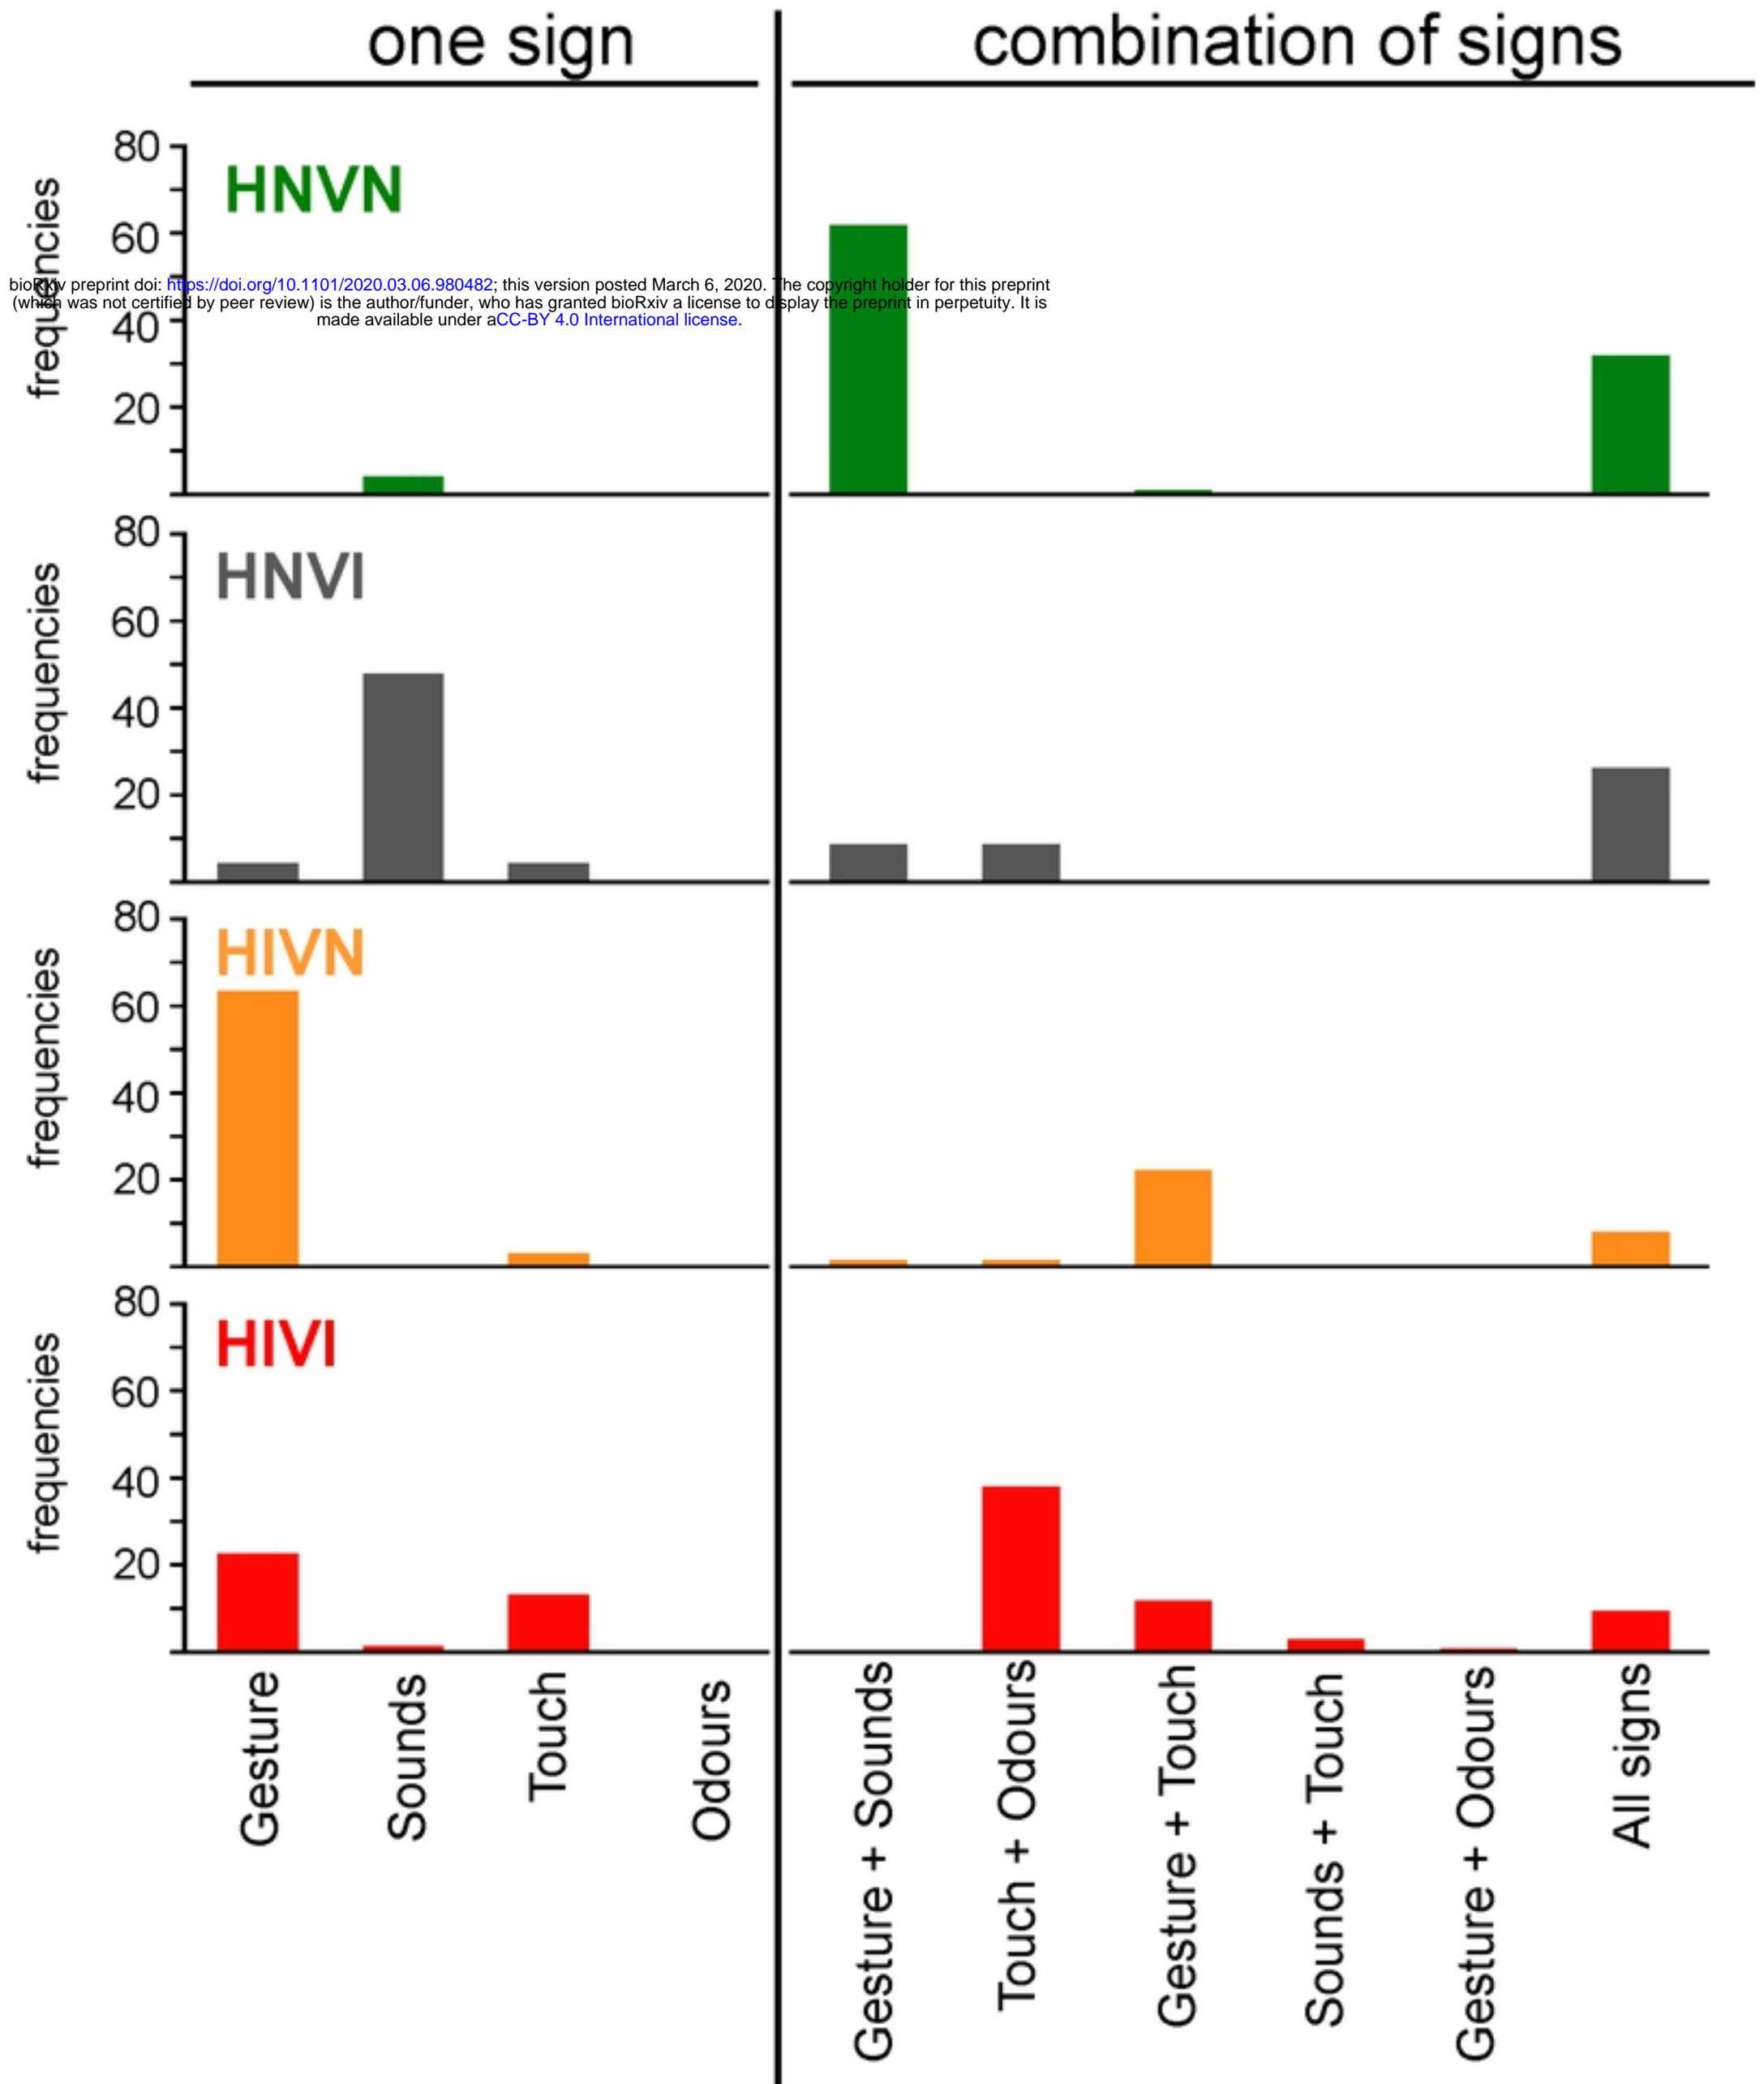

# Dog vocalisations

(a) bark

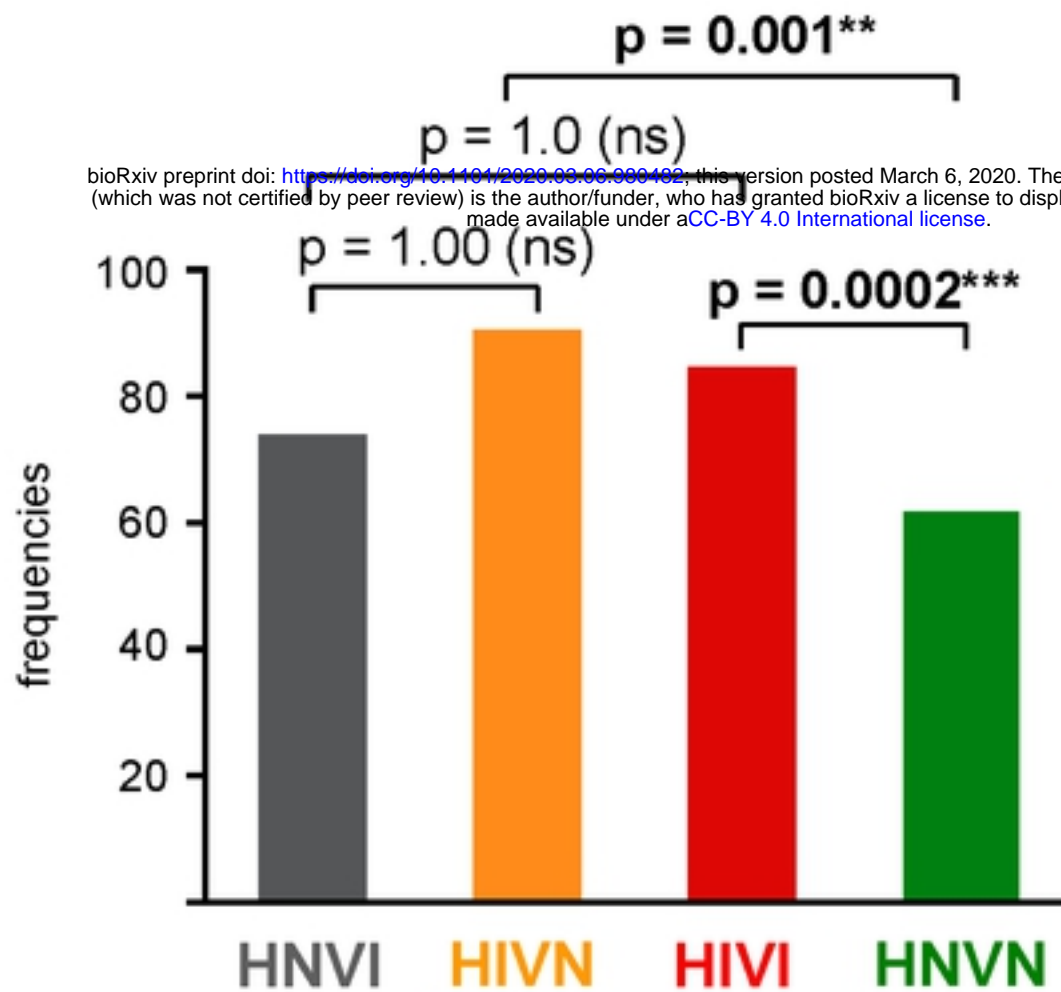

(b) whine, whimper, moan

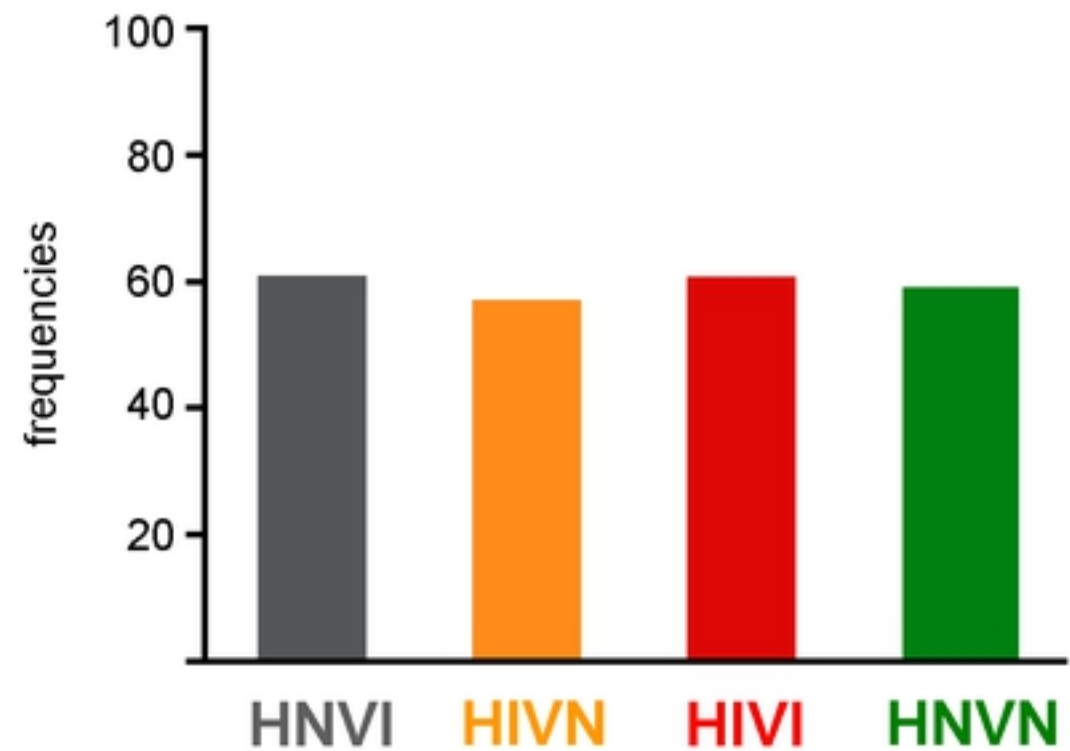

(c) yelp, yap

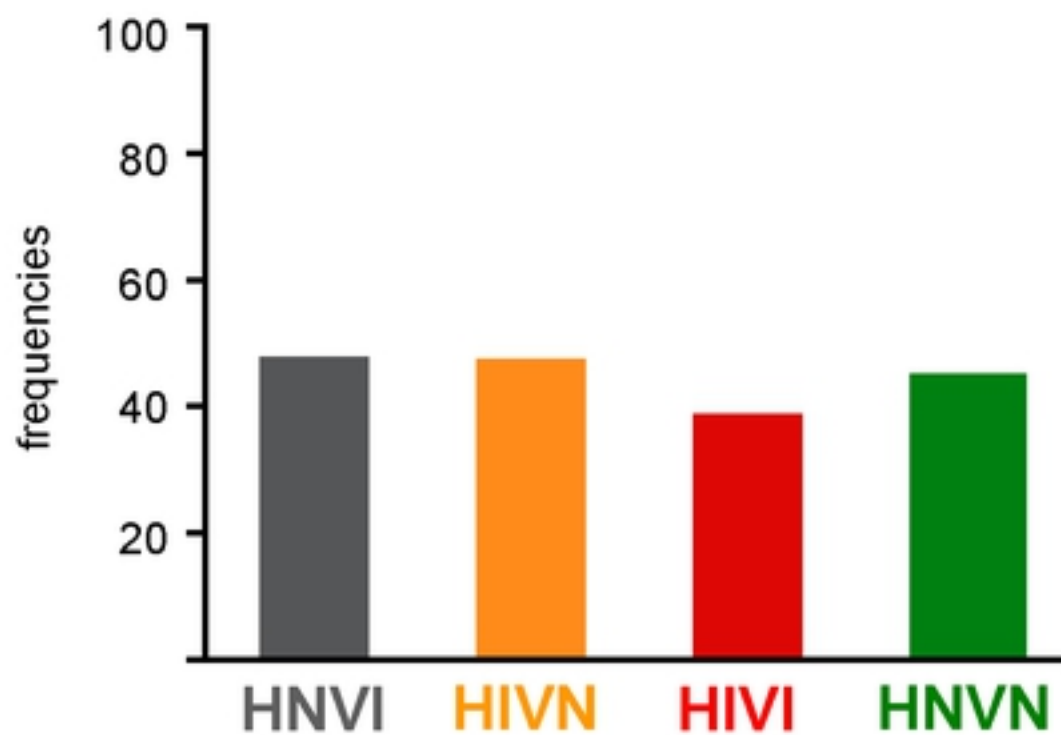

(e) growl, grunt

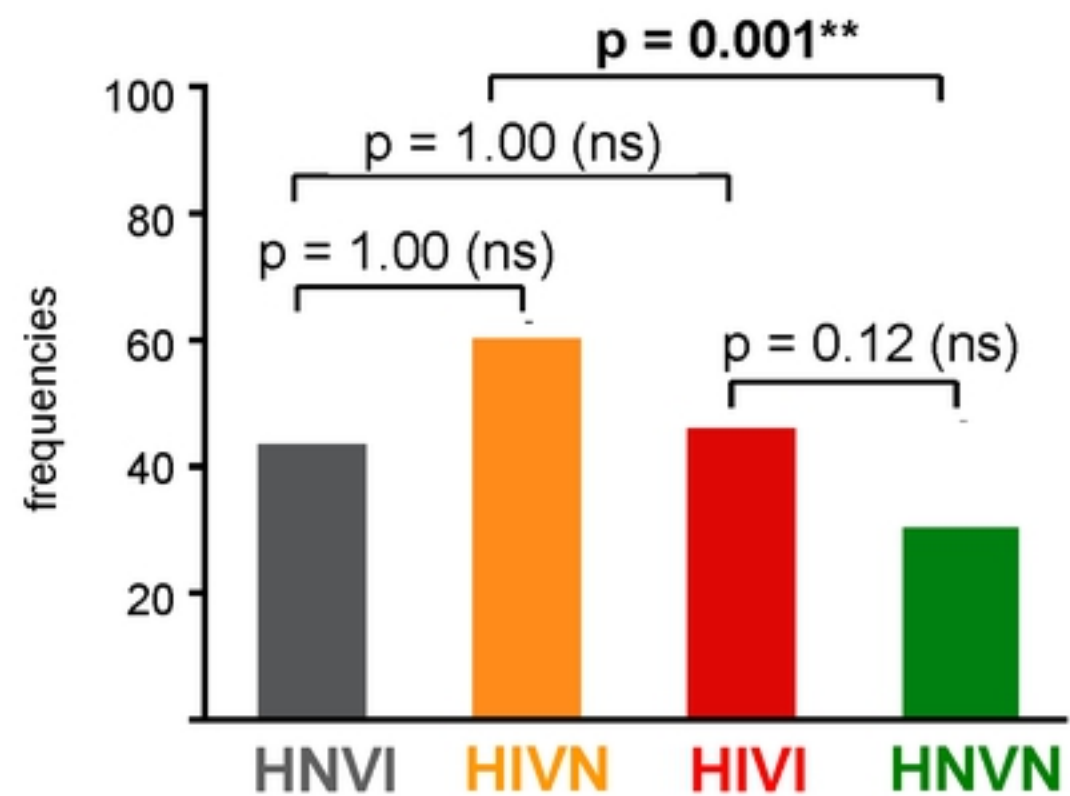

# Activities

(a) none

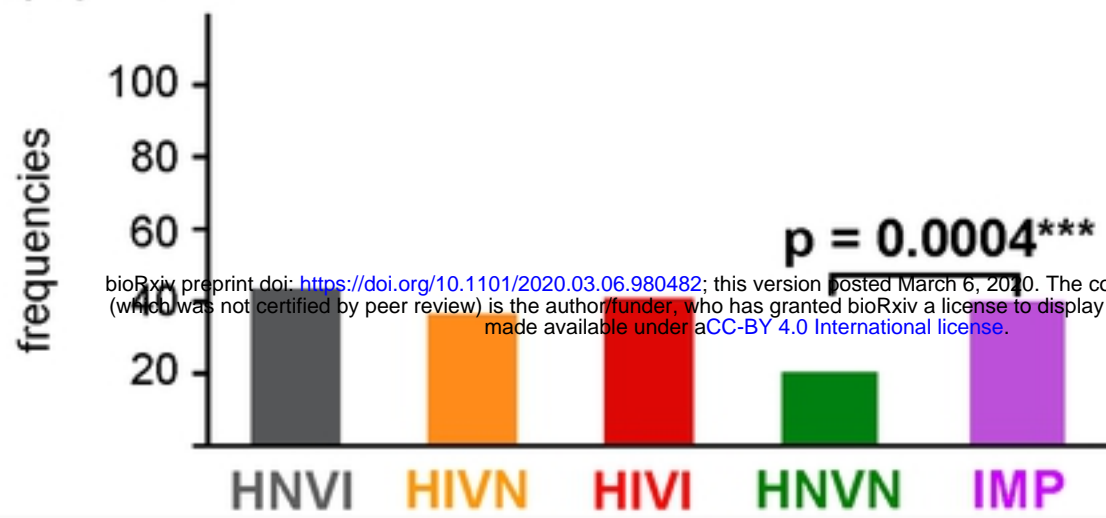

(b) canicross, bike, scootering

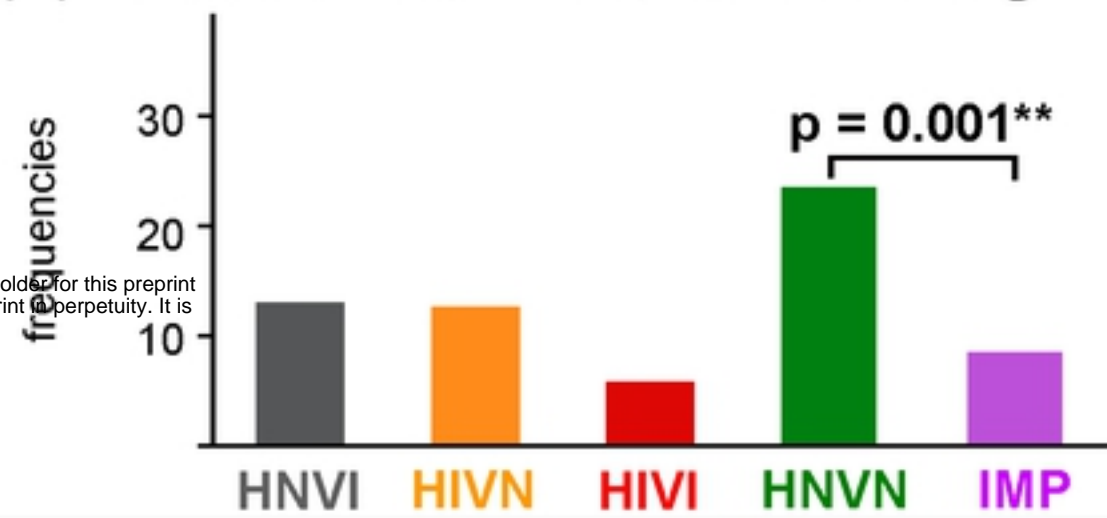

(c) agility

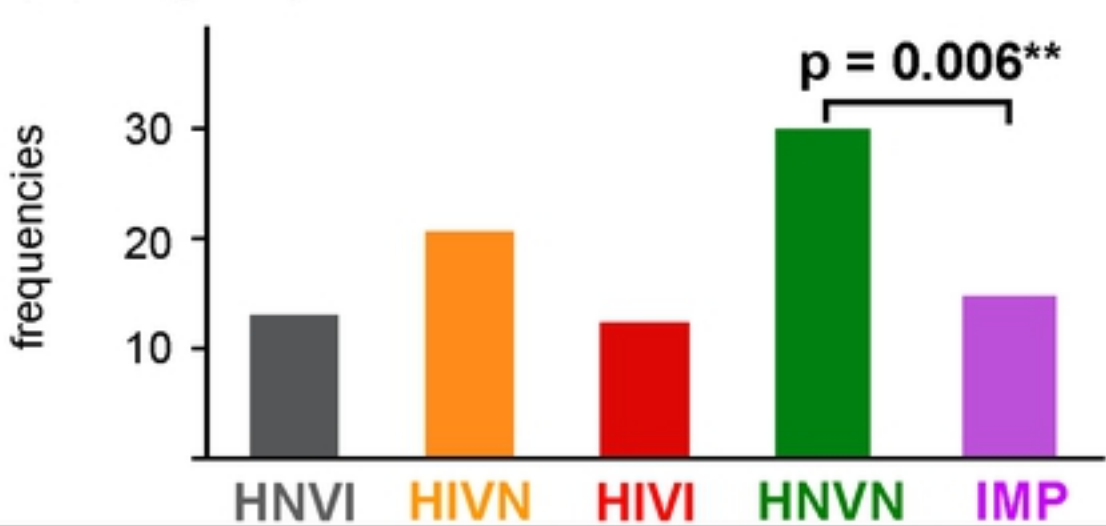

(d) sheep herding

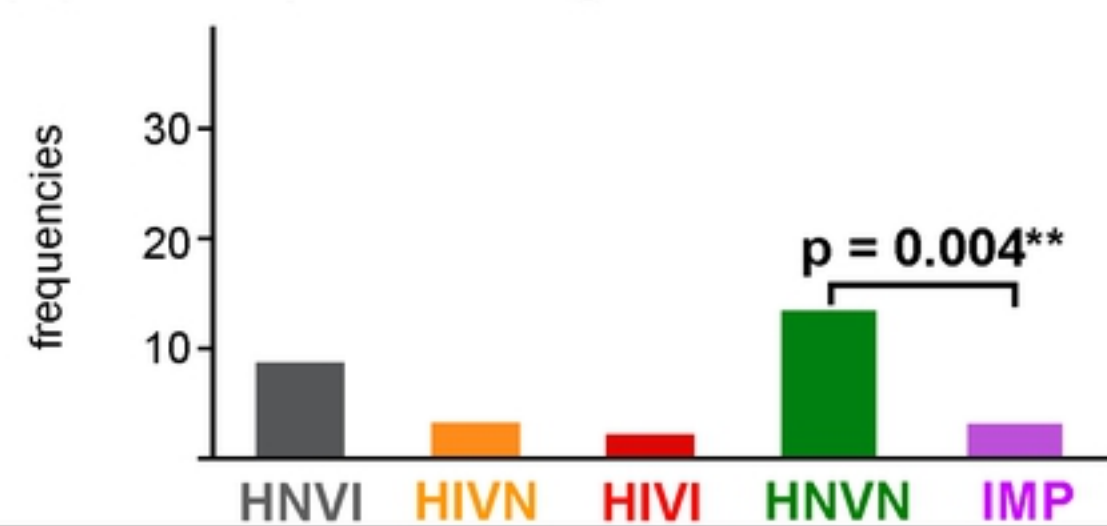

(e) dog dancing

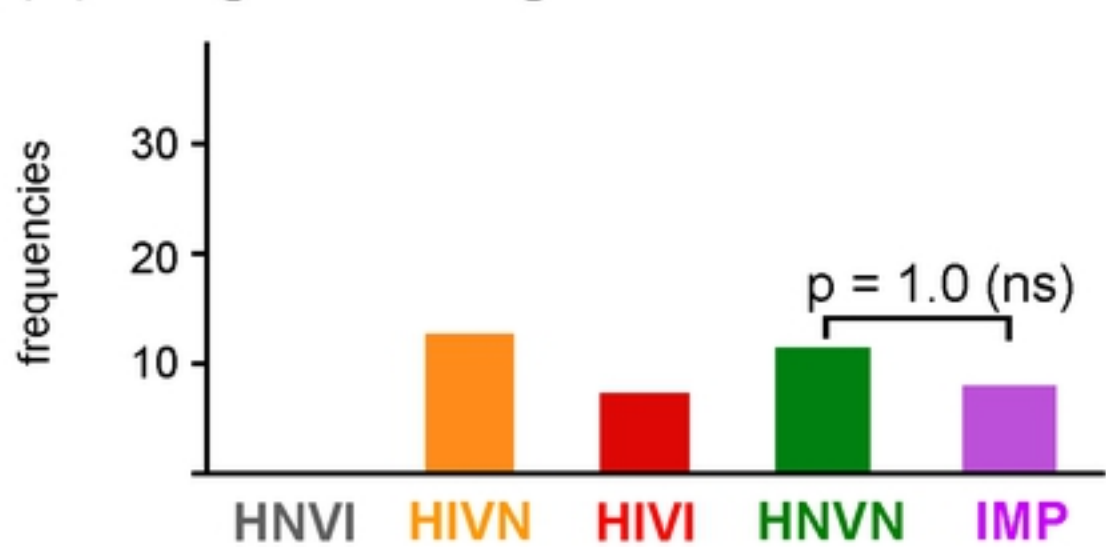

(f) tracking

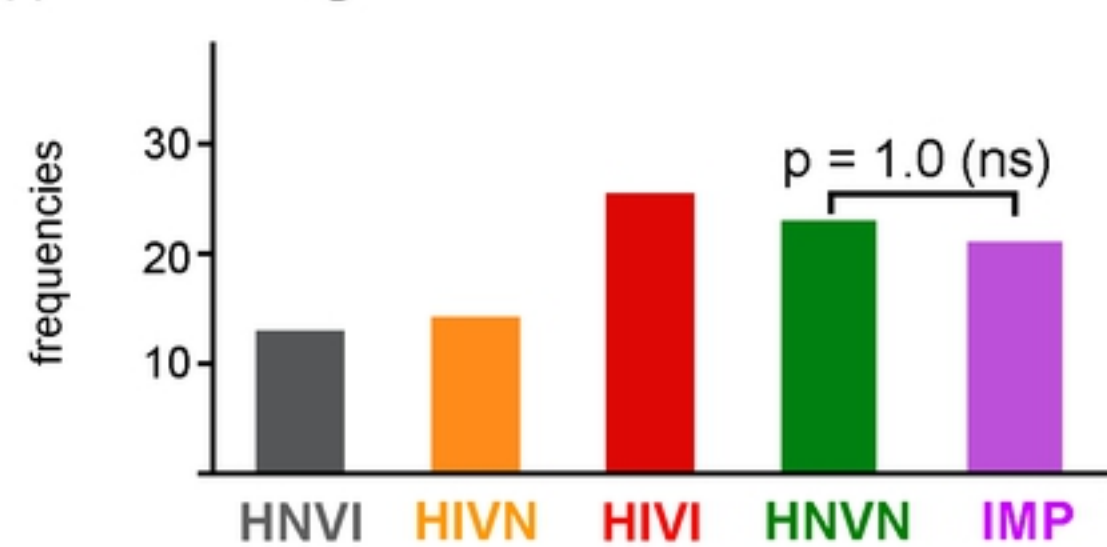

(g) frisbee, flyball, treibball

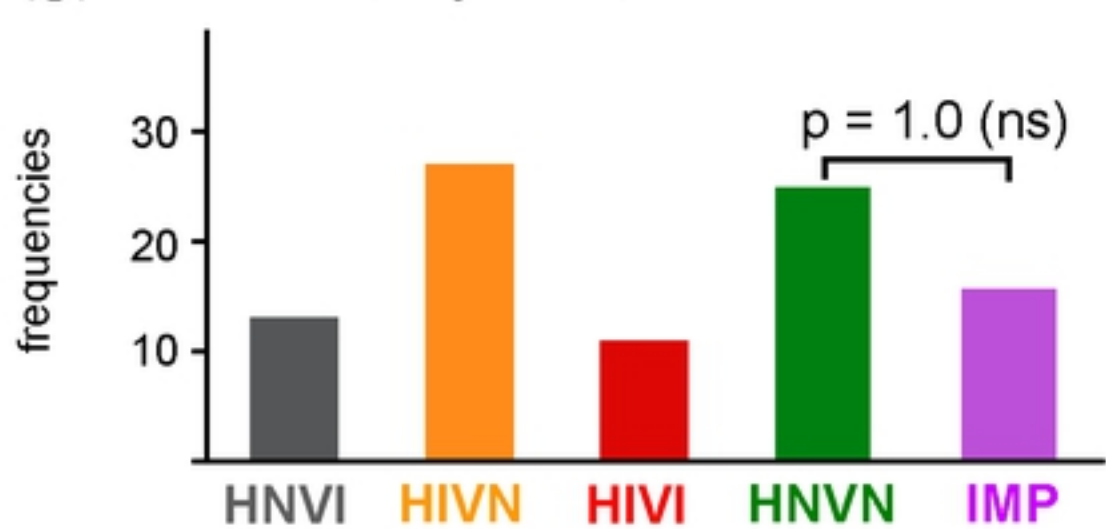

(h) other

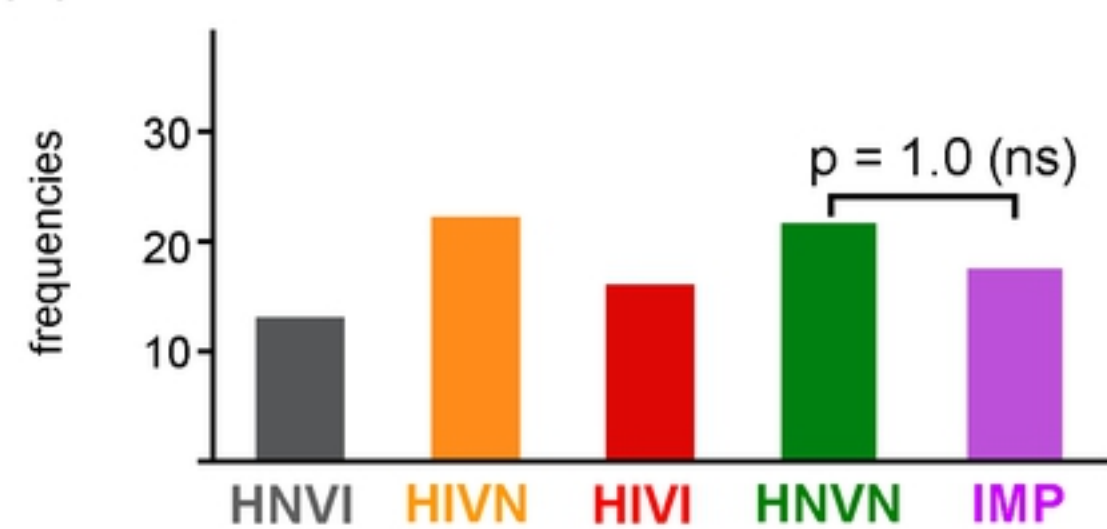

# Behavioural troubles

(a) none

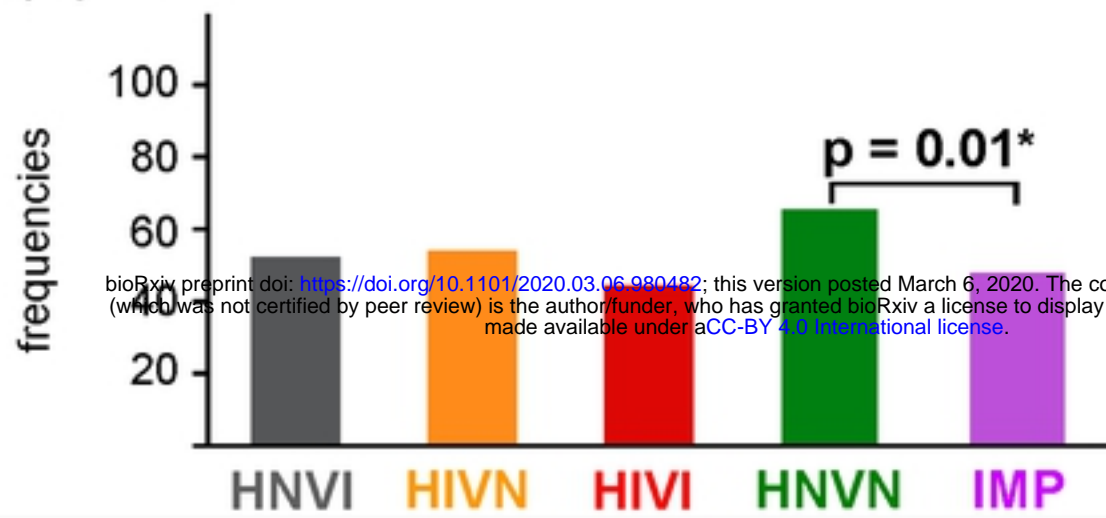

(b) aggressiveness

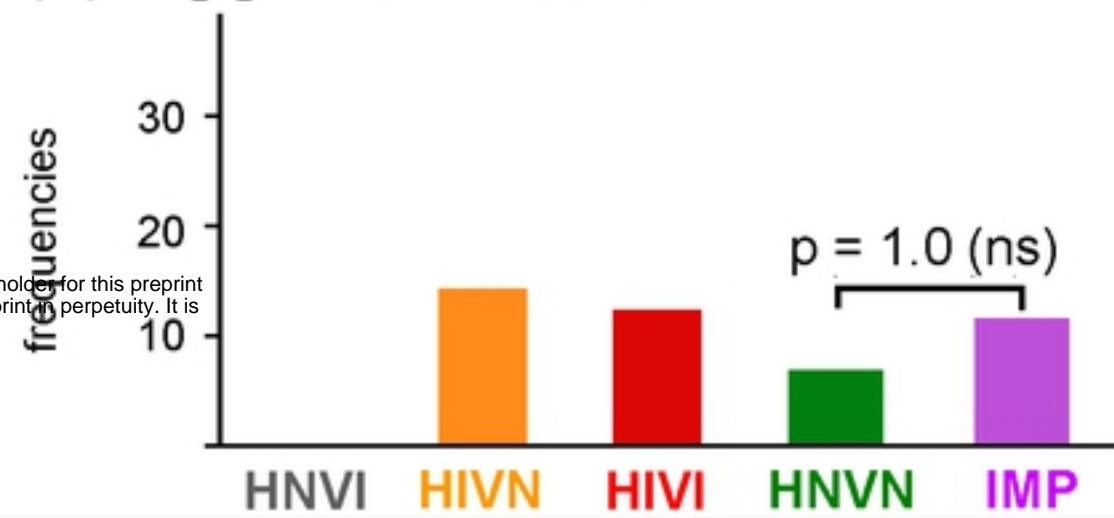

(c) anxiety

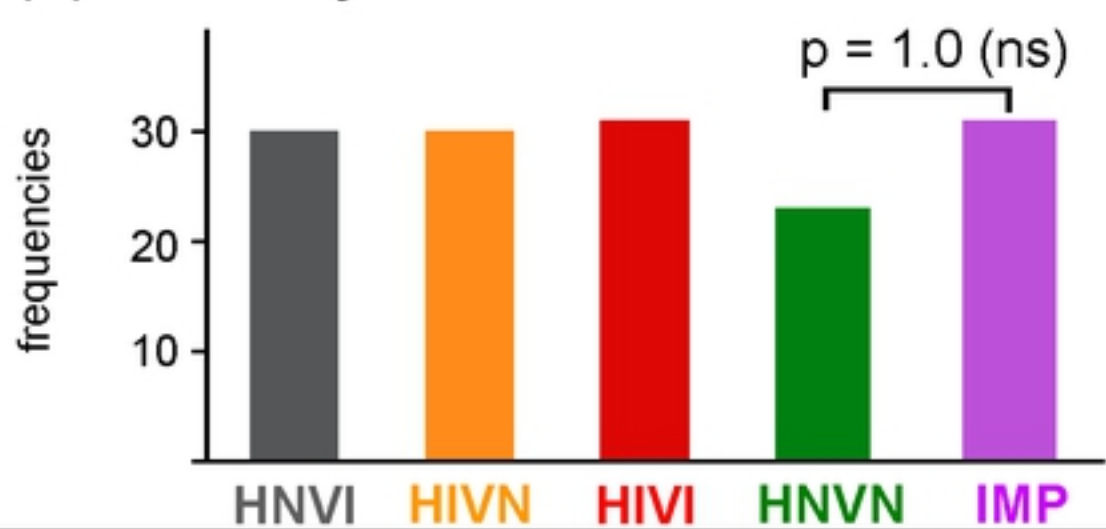

(d) OCD

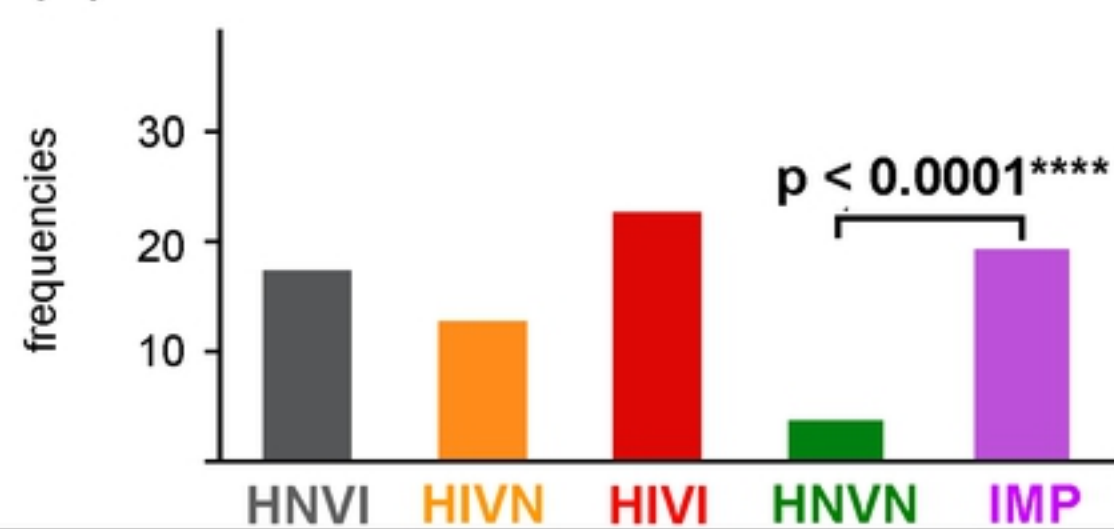

(e) ADHA

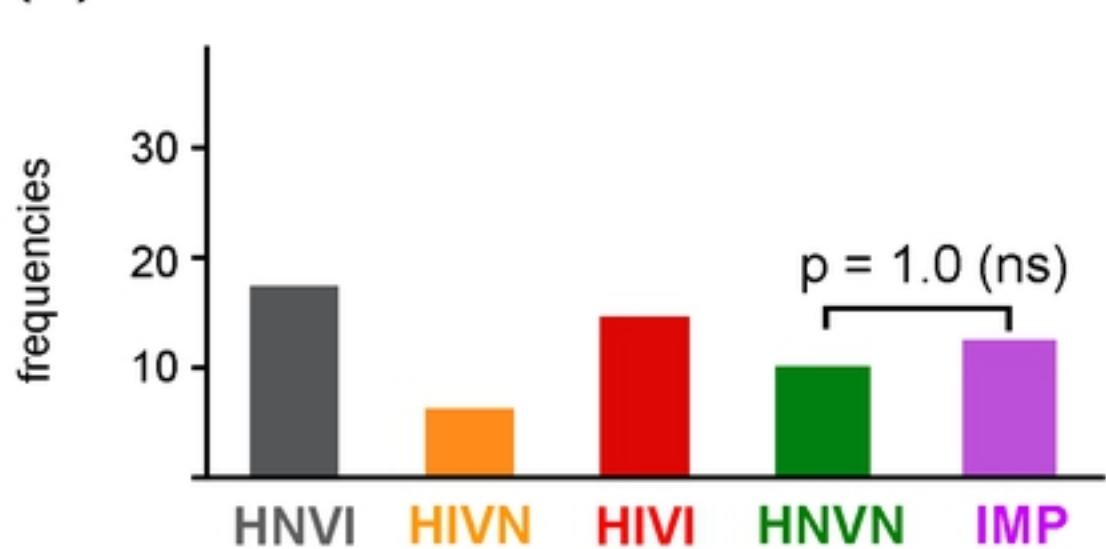

(f) other

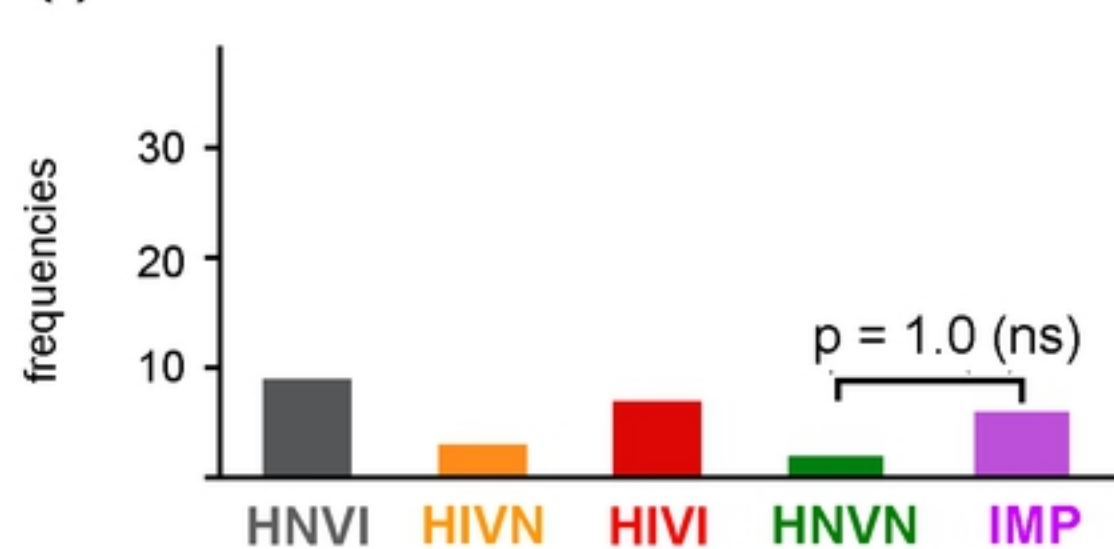

# Types of ophthalmic abnormalities

(a) microphthalmia

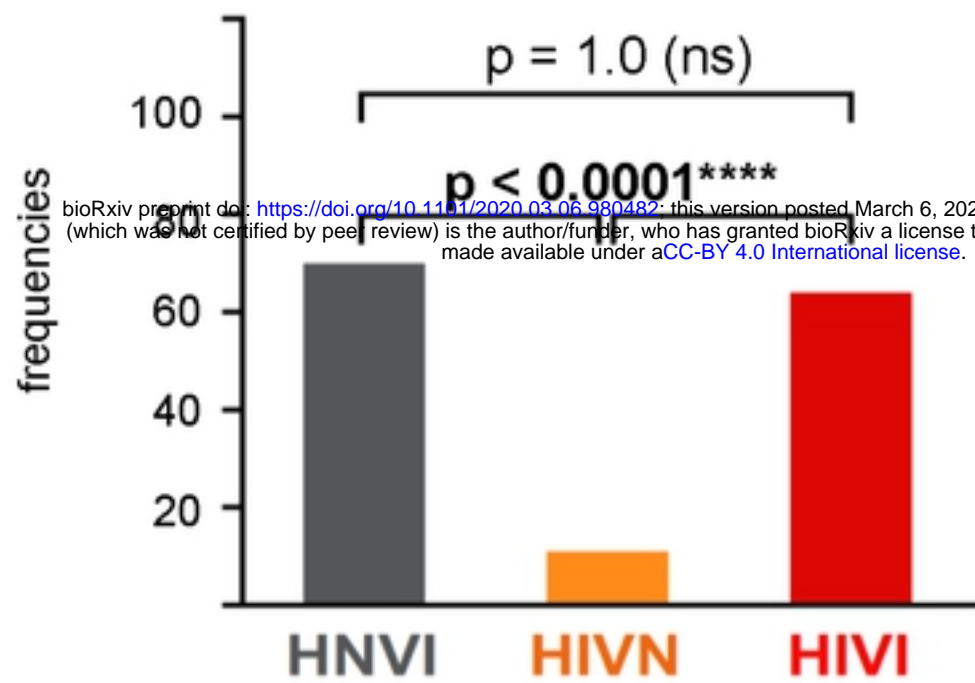

(b) misshapen pupil

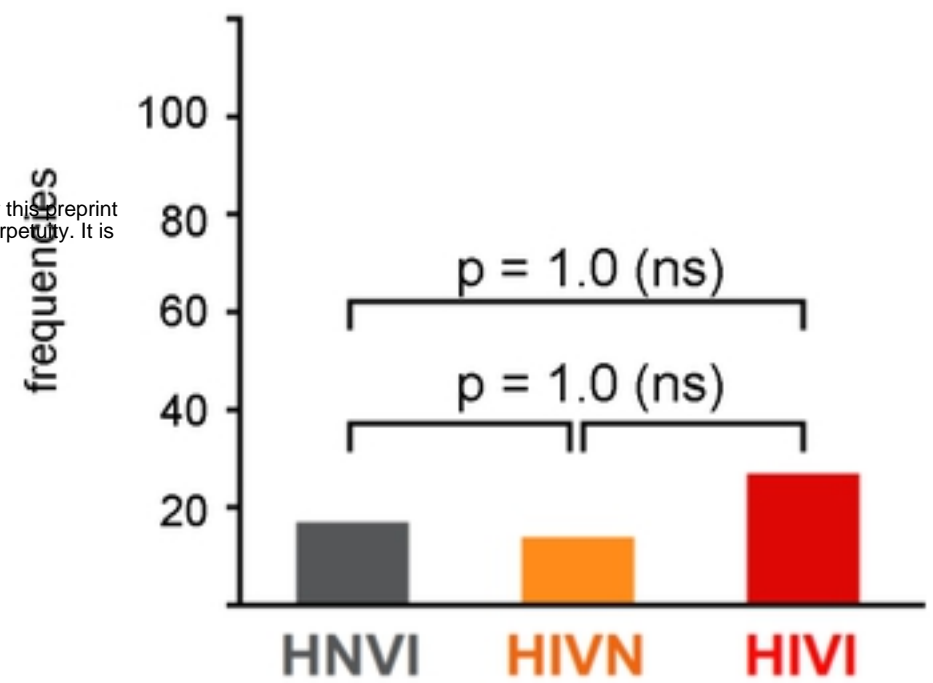

(c) cataract

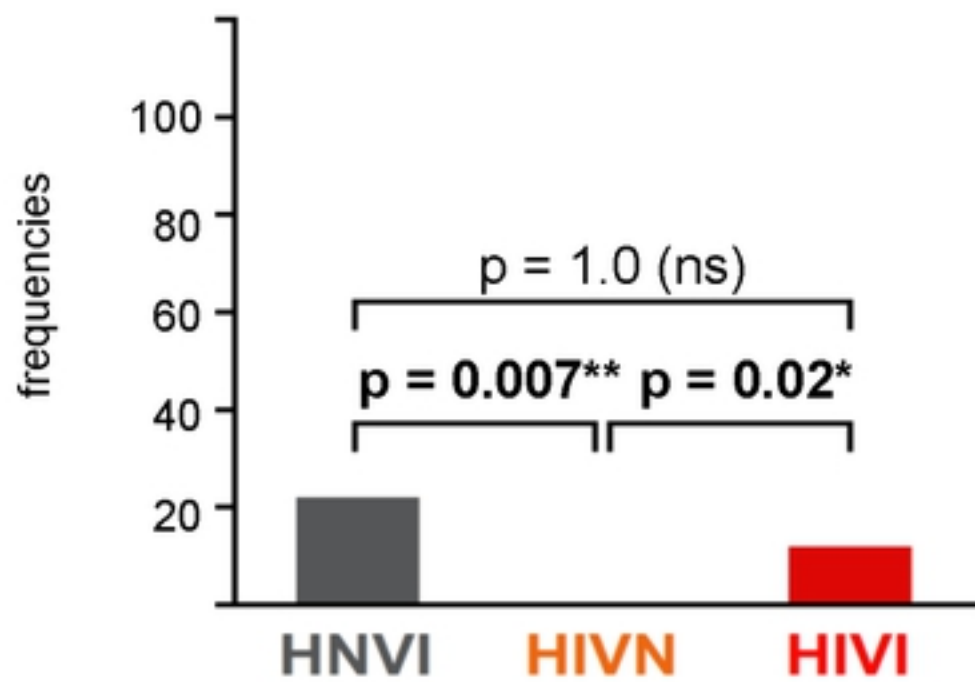

(d) absence of eyeball

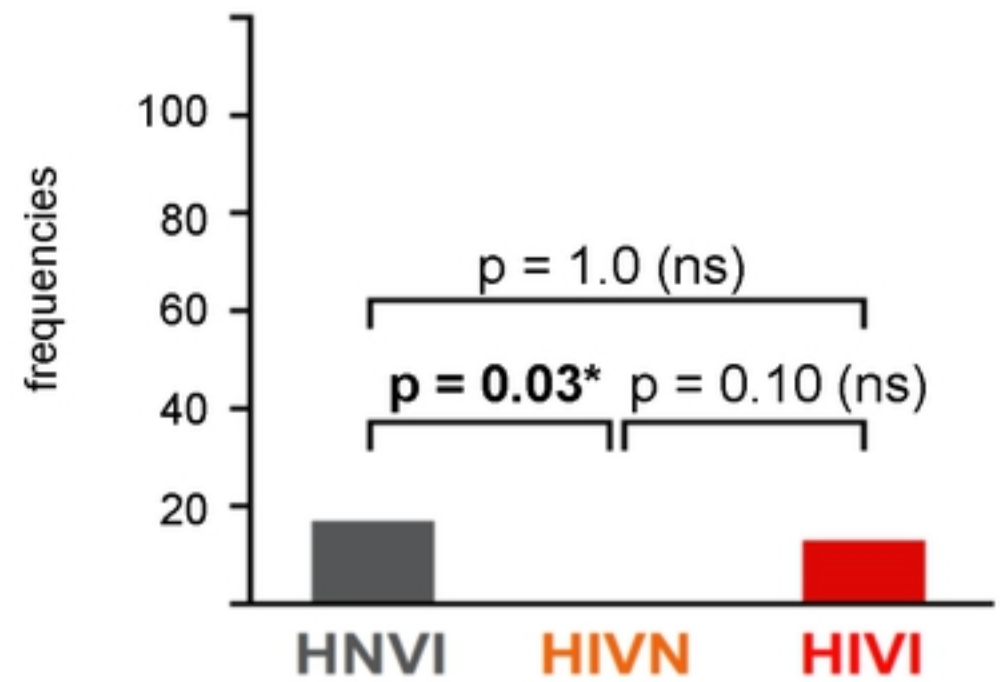

(e) other

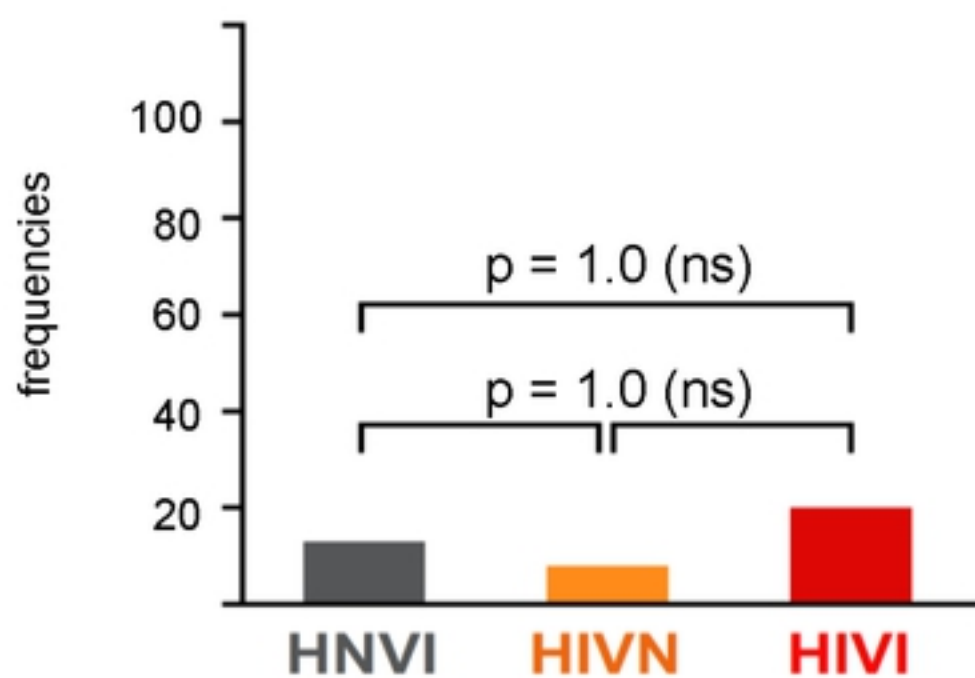

# Determination of sensory impairments

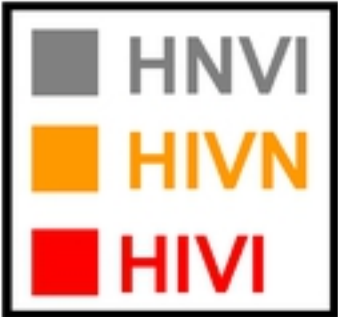

(a) score of severity

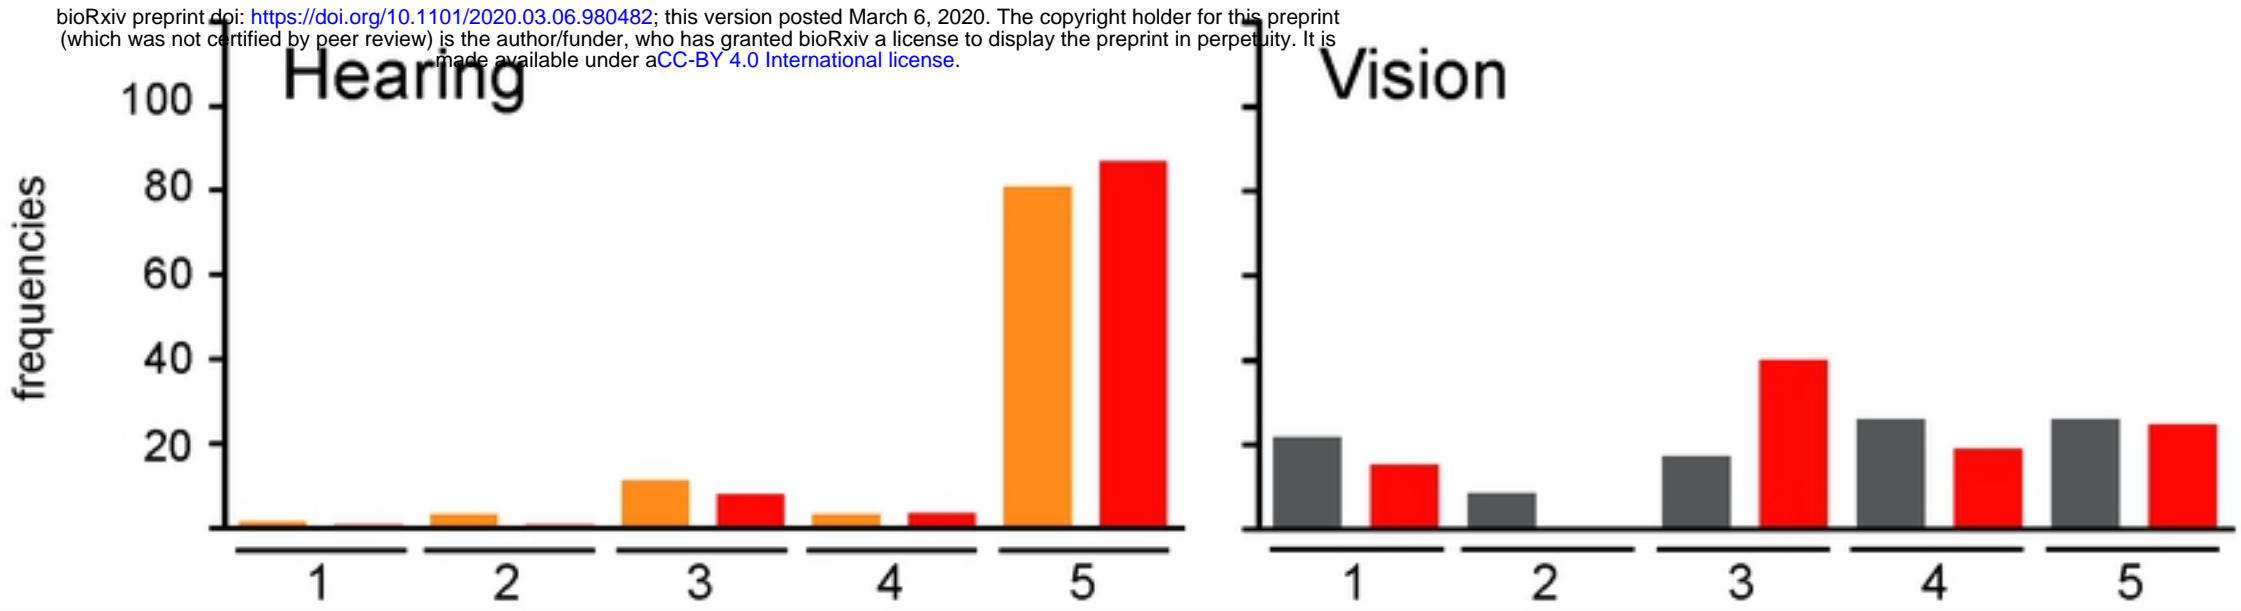

(b) type of diagnosis test

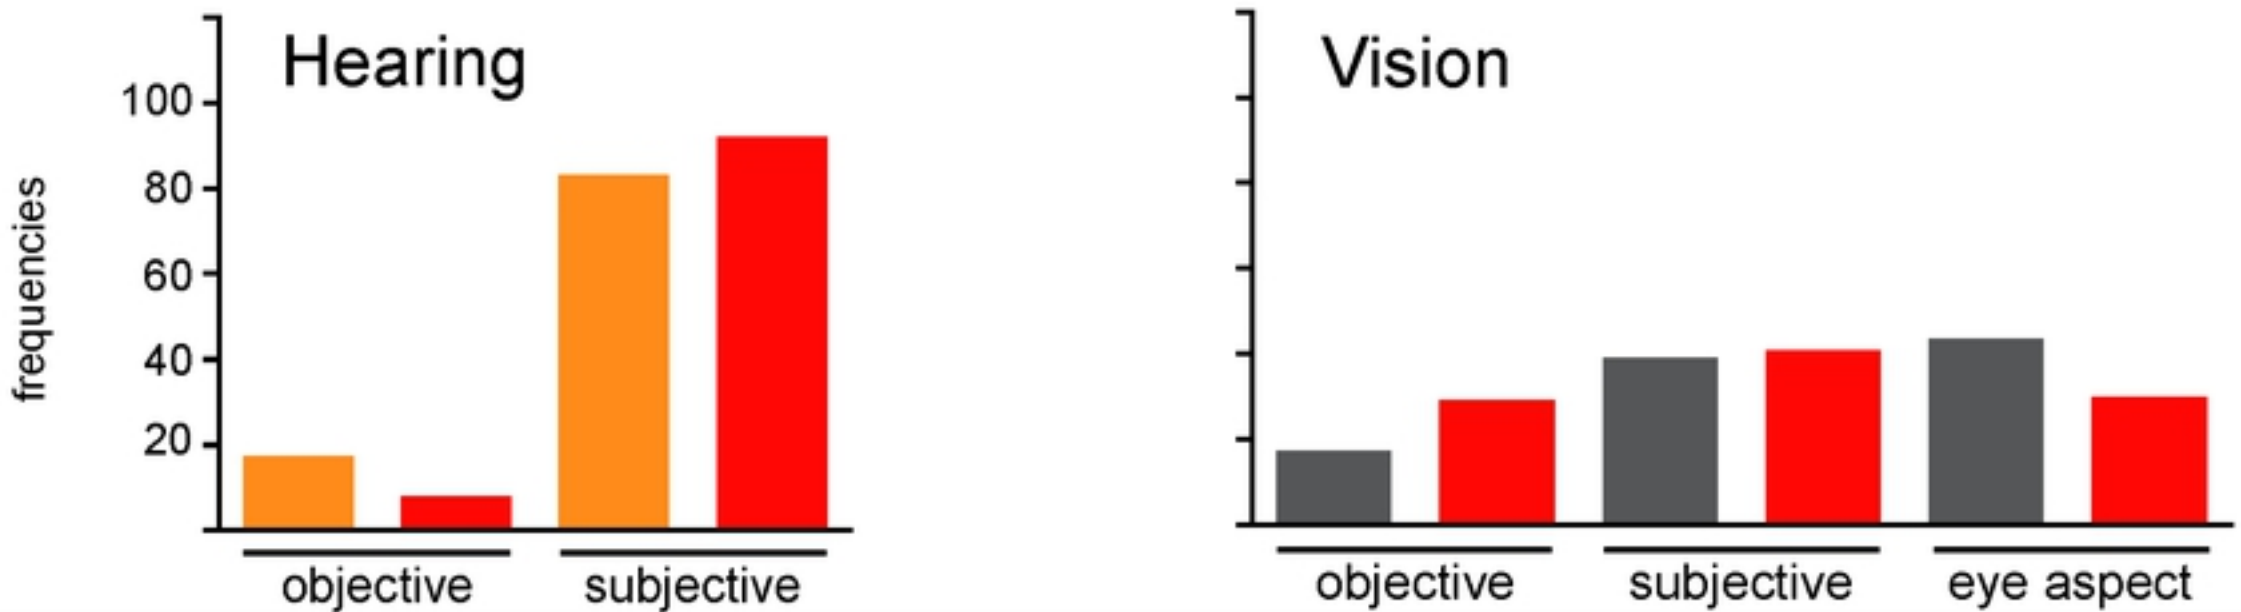

(c) operator of subjective test

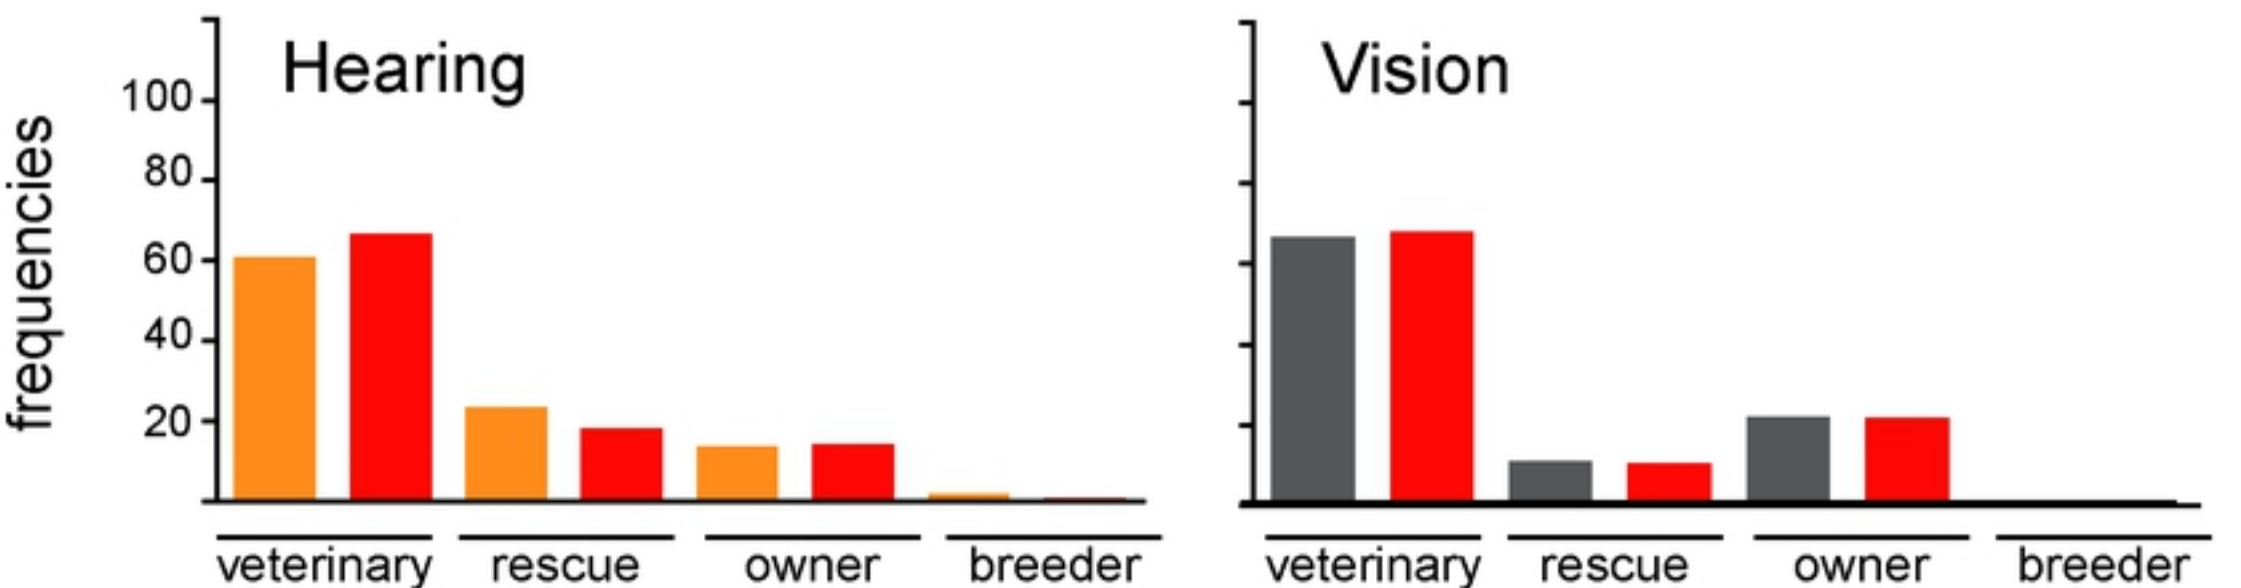

# Demographics

(a) age

bioRxiv preprint doi: <https://doi.org/10.1101/2020.03.06.980482>; this version posted March 6, 2020. The copyright holder for this preprint (which was not certified by peer review) is the author/funder, who has granted bioRxiv a license to display the preprint in perpetuity. It is made available under aCC-BY 4.0 International license.

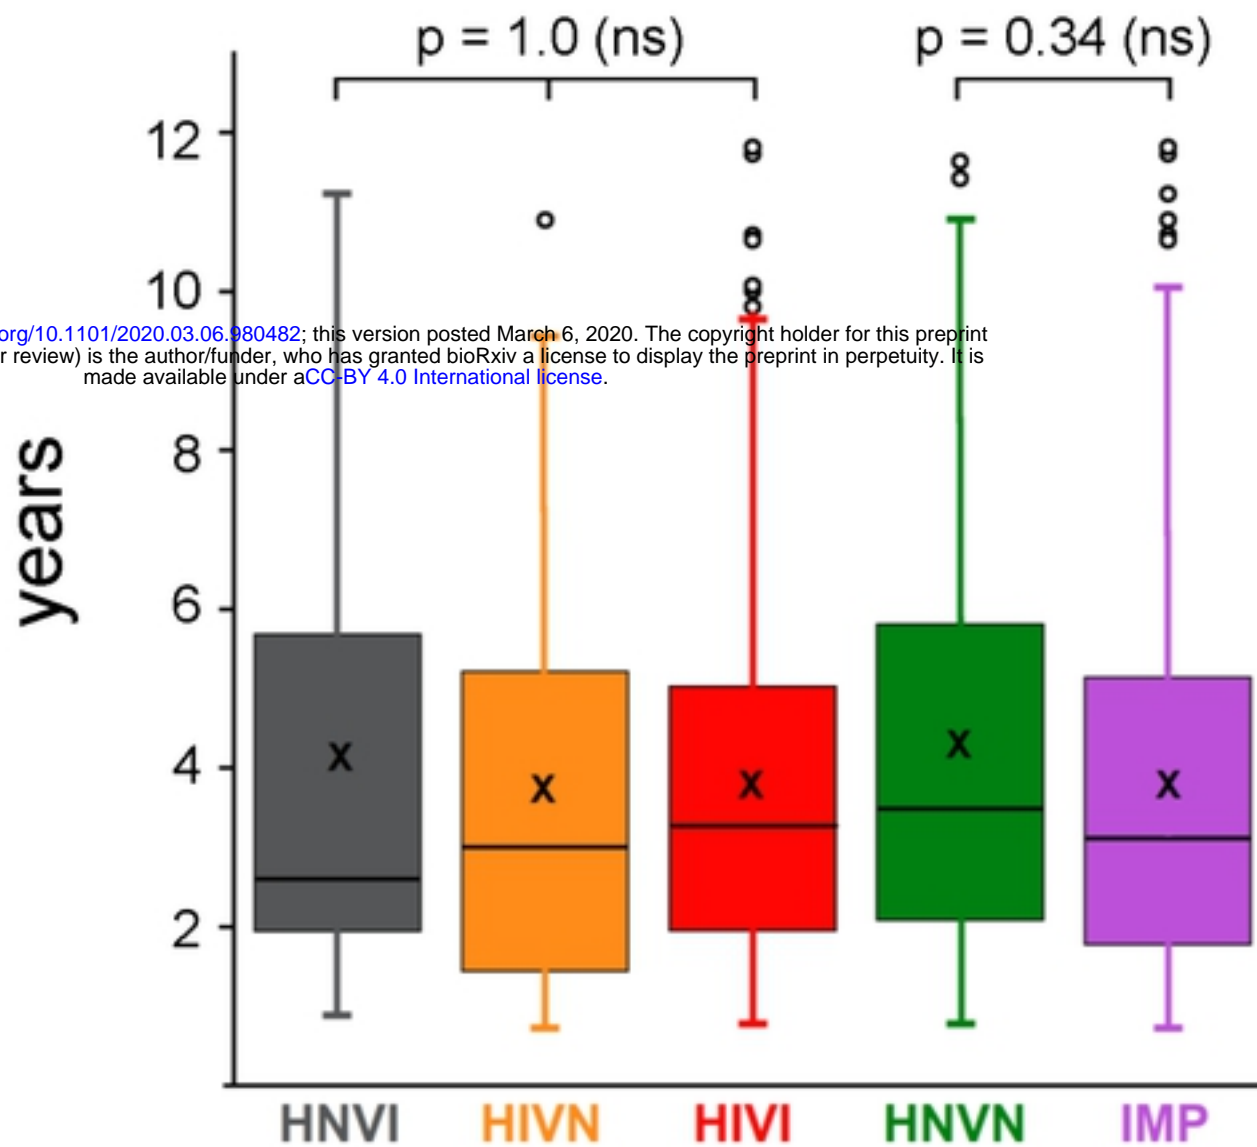

(b) lifetime with owner

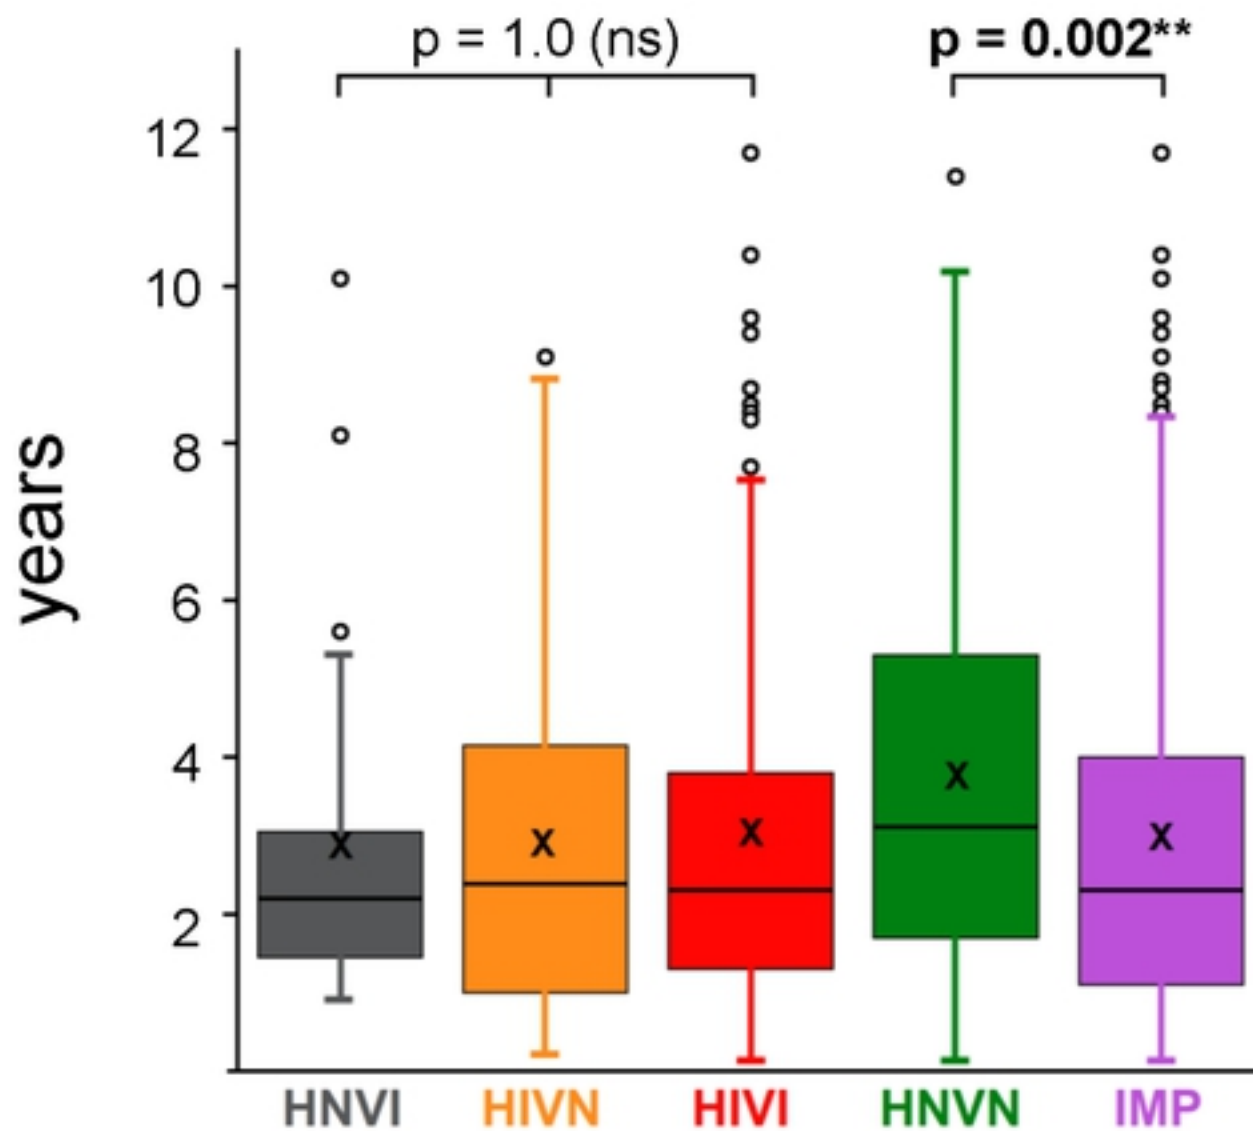



# Morphology

(a) excess white on body

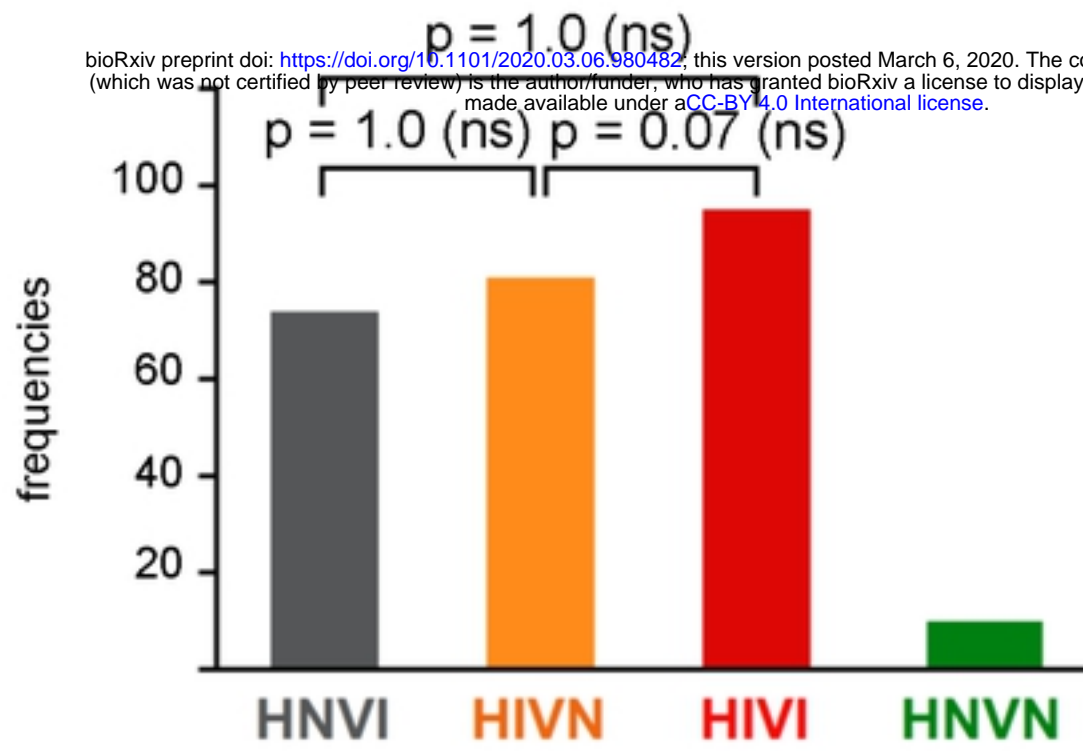

(b) excess white on head

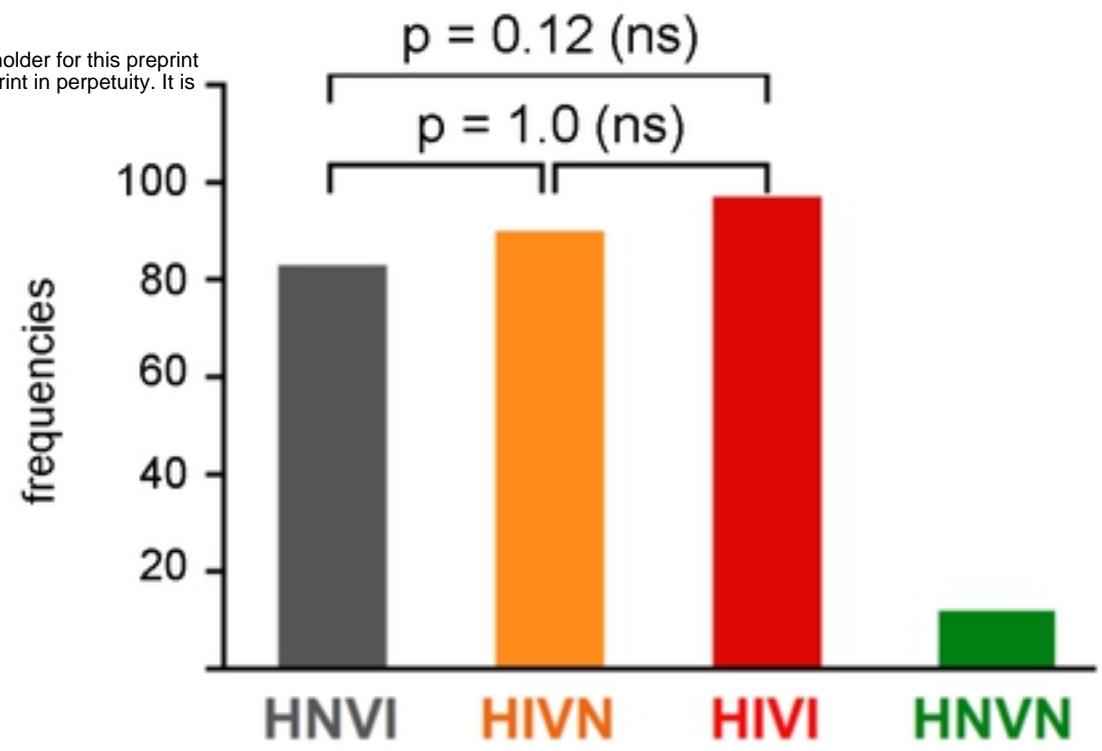

(c) discoloured or indiscernible iris(es)

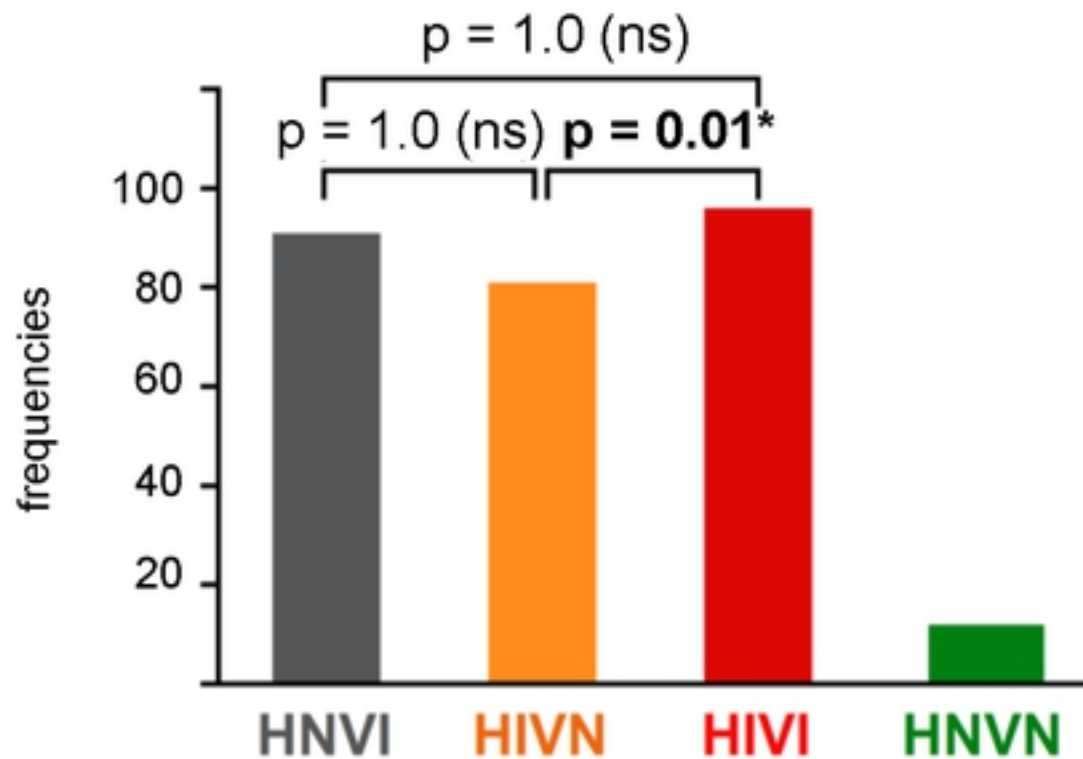

(d) ophthalmic abnormalities

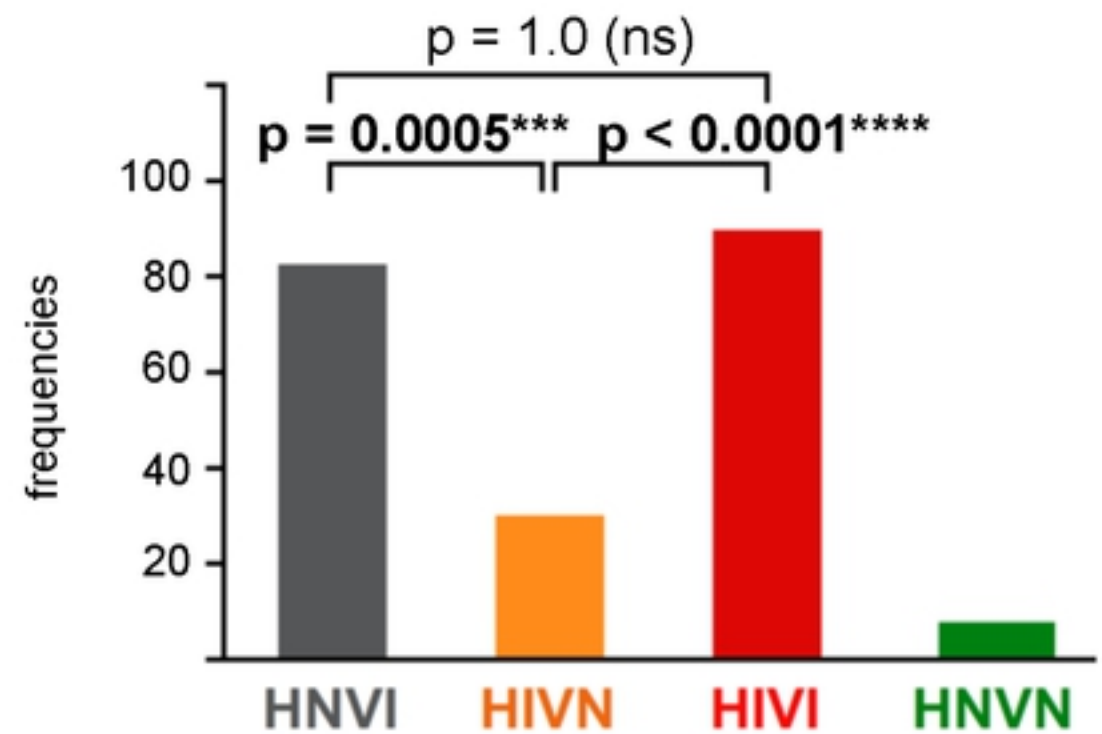

# Health troubles

(a) none

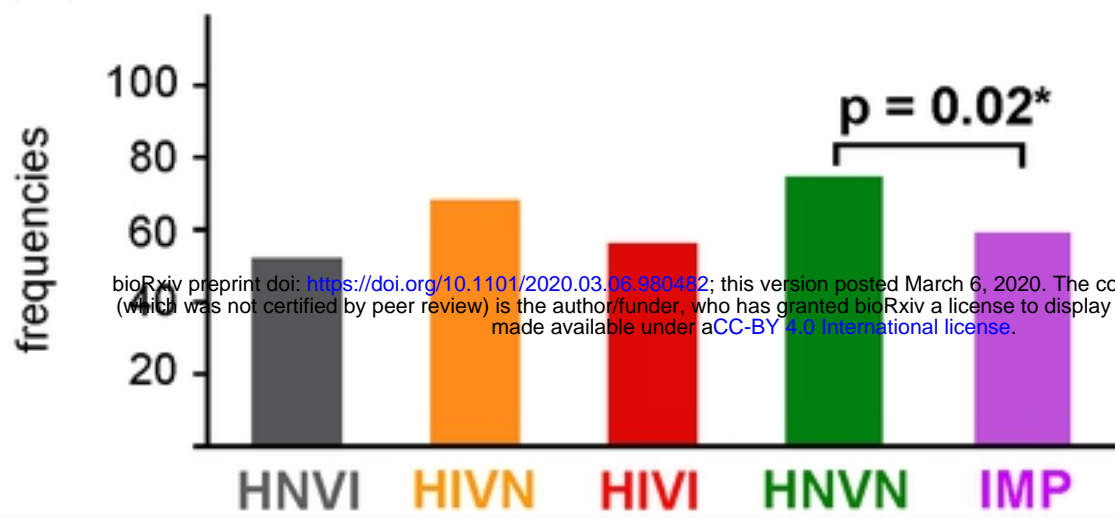

(b) neurological

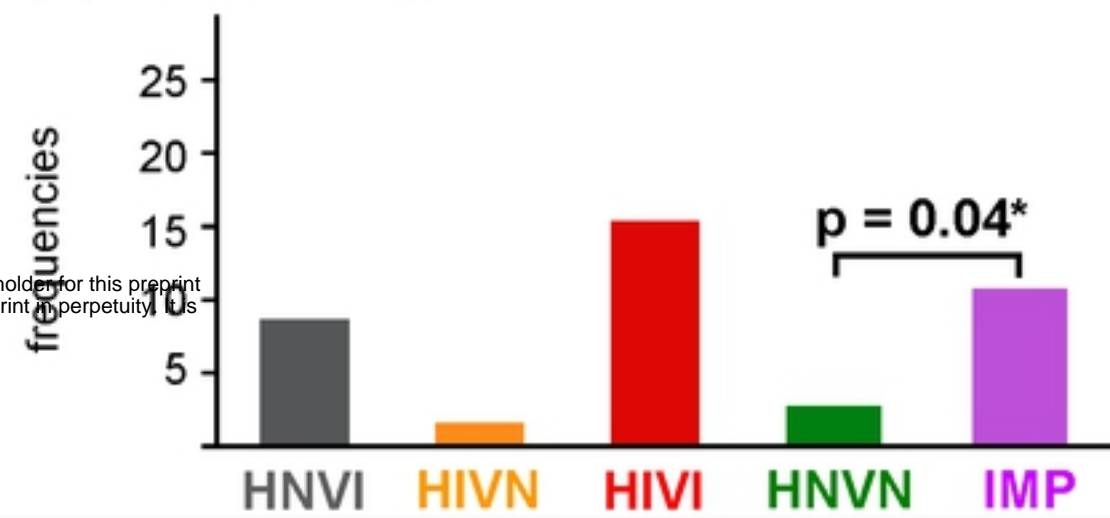

(c) heart

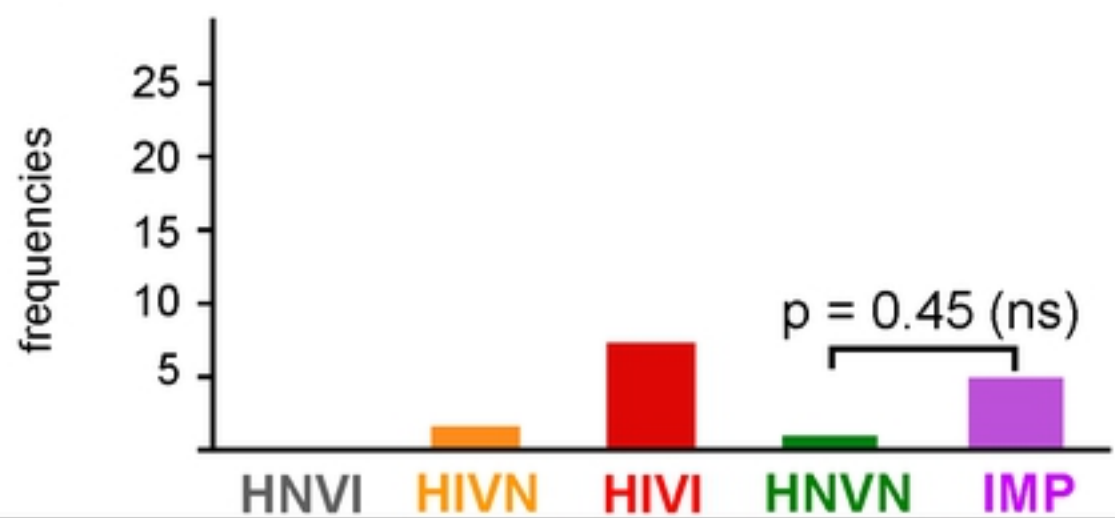

(d) bones/joint

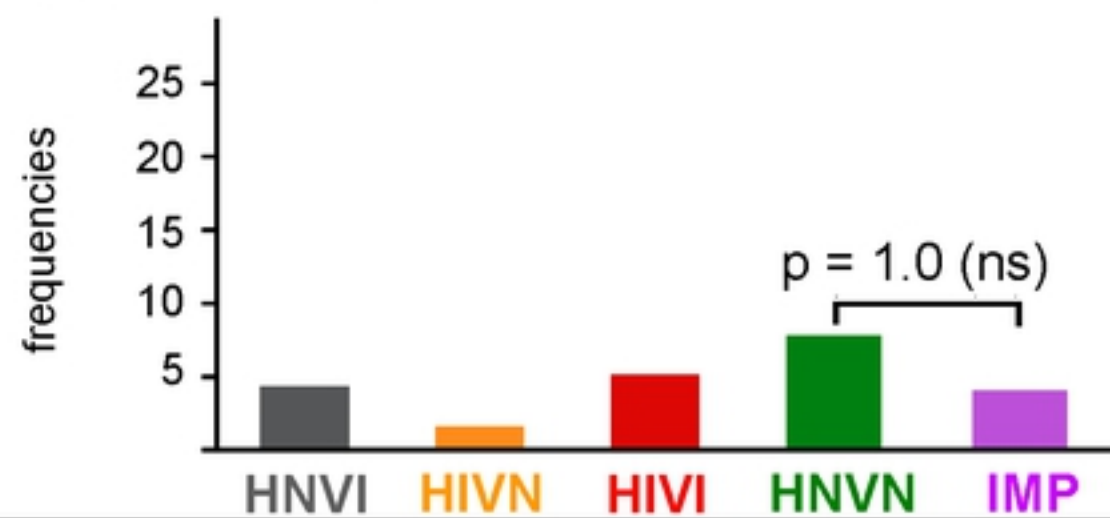

(e) skin

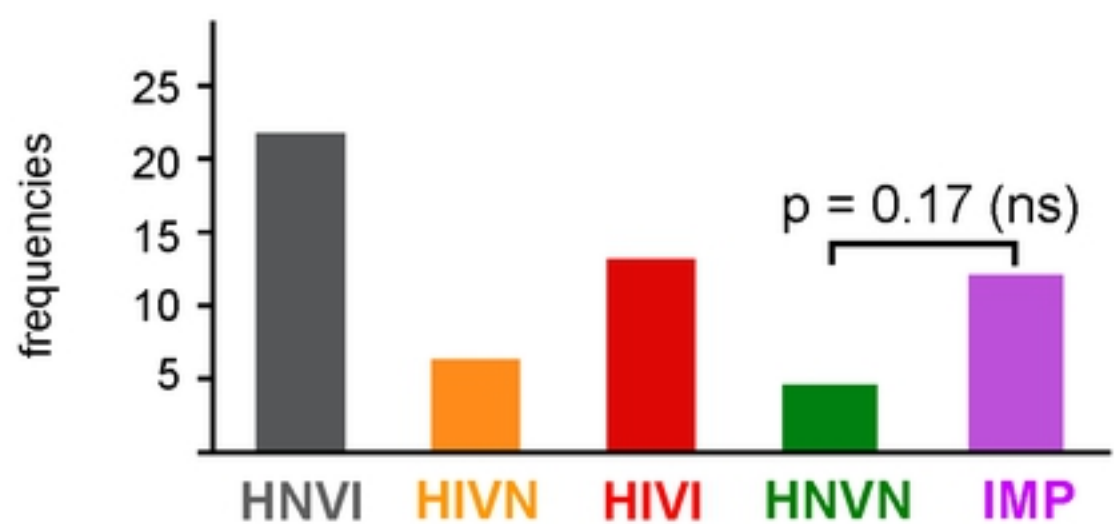

(f) digestive

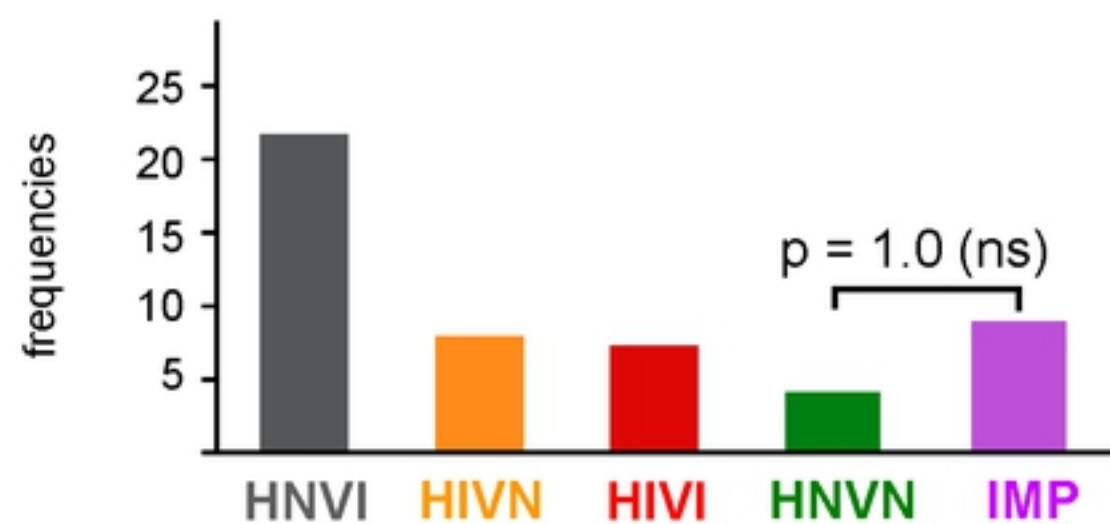

(g) other

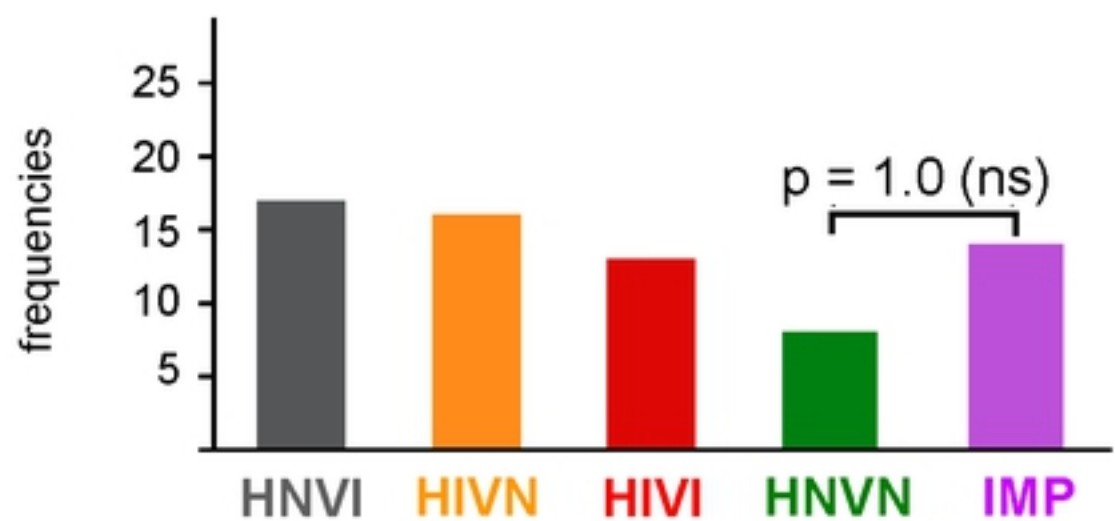

Source: http://biorxiv.org/content/10.1101/2020.03.06.980482v1.full.pdf
